1  
2  
3  
4  
5  
6  
7  
8  
9  
10  
11  
12  
13  
14  
15  
16  
17  
18  
19  
20  
21  
22  
23  
24  
25  
26  
27  
28  
29  
30  
31  
32  
33

## **Disruption of the grid cell network in a mouse model of early Alzheimer’s disease**

**Authors:** Johnson Ying<sup>1,2</sup>, Alexandra T. Keinath<sup>1</sup>, Raphael Lavoie<sup>1</sup>, Erika Vigneault<sup>1</sup>, Salah El Mestikawy<sup>1,2</sup>, Mark P. Brandon<sup>1,2,\*</sup>

### **Affiliations:**

<sup>1</sup>Department of Psychiatry, Douglas Hospital Research Centre, McGill University, Montreal, QC, Canada.

<sup>2</sup>Integrated Program in Neuroscience, McGill University, Montreal, QC, Canada.

\*Correspondence to: [mark.brandon@mcgill.ca](mailto:mark.brandon@mcgill.ca)

34 **Abstract**

35           Early-onset familial Alzheimer’s disease (AD) is marked by an aggressive buildup of  
36 amyloid beta (A $\beta$ ) proteins, yet the neural circuit operations impacted during the initial stages of  
37 A $\beta$  pathogenesis remain elusive. Here, we report a coding impairment of the medial entorhinal  
38 cortex (MEC) grid cell network in a transgenic mouse model of familial AD that over-expresses  
39 A $\beta$  throughout the hippocampus and entorhinal cortex. Grid cells showed reduced spatial  
40 periodicity, spatial stability, and synchrony with interneurons and head-direction cells. In contrast,  
41 the spatial coding of non-grid cells within the MEC, and place cells within the hippocampus,  
42 remained intact. Grid cell deficits emerged at the earliest incidence of A $\beta$  fibril deposition and  
43 coincided with impaired spatial memory performance in a path integration task. These results  
44 demonstrate that widespread A $\beta$ -mediated damage to the entorhinal-hippocampal circuit results  
45 in an early impairment of the entorhinal grid cell network.

46

47

48

49

50

51

52

53

54

55

56

57 **Main Text**

58 The molecular and synaptic underpinnings of A $\beta$  pathology during the earliest stages of  
59 familial AD are well-documented, but the impact that these changes have on neural coding  
60 has not been resolved<sup>1,2</sup>. The emergence of spatial memory deficits in patients with preclinical  
61 AD and those with Mild Cognitive Impairment with high levels of cerebrospinal fluid A $\beta$   
62 suggest that initial A $\beta$  pathology exerts its earliest impact on the neural systems that support  
63 spatial memory<sup>3,4</sup>. Extensive work in both animals and humans have pinpointed the MEC-  
64 hippocampal circuit as essential brain regions for spatial memory performance<sup>5-7</sup>. At the level  
65 of neural coding, the MEC-hippocampal circuit contains a myriad of spatially-tuned cell types  
66 including place cells in the hippocampus, as well as grid cells, head direction cells, and non-  
67 grid spatially-selective cells in the MEC<sup>8-12</sup>. Decades of theoretical work have proposed how  
68 these functional cell types work in concert to support spatial memory<sup>13-17</sup>. Yet, it remains  
69 unknown how these spatially-tuned populations are impacted at the earliest stages of A $\beta$ -  
70 mediated pathogenesis when spatial memory is impaired.

71 To address this, we used a J20 transgenic mouse model of familial AD that expresses a  
72 mutant form of human amyloid precursor protein (APP), referred to here as ‘APP mice’<sup>18</sup>. In  
73 this model, elevated and comparable levels of soluble A $\beta$  throughout the entorhinal cortex  
74 and hippocampus are present at 3 months of age<sup>19</sup>. By 5-7 months of age, small A $\beta$  fibrils are  
75 detectable in the hippocampus but neither of these regions demonstrate widespread amounts of  
76 A $\beta$  plaques that are indicative of late AD pathology<sup>19</sup>. We confirmed that APP mice expressed  
77 little-to-no plaques by 6 months of age in the MEC and hippocampus (**Supplementary Fig.**  
78 **1**). Between 3-7 months of age, APP mice exhibit several amyloid-related processes that we  
79 refer to collectively as ‘early A $\beta$  pathology’. These include neuroinflammation, 10-20%

80 neuronal loss, and reduced presynaptic terminal density throughout the entorhinal cortex and  
81 hippocampus (detailed pathology description in Methods, *Subjects*)<sup>20-23</sup>.

82 We obtained *in vivo* recordings of MEC neurons (n cells = 4524) from 38 APP transgenic  
83 and 30 non-transgenic (nTG) littermates as they foraged for water droplets in an open field arena  
84 (*Summary of MEC recordings, Tables 1, 2; MEC Tetrode locations, Supplementary Fig. 2*). We  
85 observed an age-related disruption in the spatial periodicity of grid cells in APP mice (**Fig. 1a-d,**  
86 **Supplementary Figs. 3, 4, 5**). Young APP mice (3-4.5 months) had grid cells with tuning  
87 comparable to those of age-matched nTG mice (**Fig. 1**). In contrast, grid cells recorded in adult  
88 (4.5-7 months) APP mice exhibited reduced spatial periodicity and spatial information (bits/spike)  
89 in comparison to those from young APP mice and age-matched nTG mice (**Fig. 1**). Peak spatial  
90 firing and mean firing rates of grid cells did not reliably differ between groups and across age (**Fig.**  
91 **1e**). A two-way ANOVA was conducted to determine the effects of age and genotype on grid score  
92 between groups. A significant interaction effect was discovered, supporting the view that grid cell  
93 spatial periodicity is reduced across age in APP mice (*ANOVA*, age main effect:  $P = 0.0000002$ ;  
94 genotype main effect:  $P = 0.024$ ; interaction effect:  $P = 0.00062$ , **Supplementary Fig. 6**). To  
95 ensure that these results are not biased by oversampling the same cells across days, we removed  
96 duplicate grid cells and re-ran our analyses. Grid cell spatial periodicity remained impaired in adult  
97 APP mice, and the significant interaction effect persisted (*ANOVA*, age main effect:  $P = 0.00045$ ;  
98 genotype main effect:  $P = 0.013$ ; interaction effect:  $P = 0.046$ , **Supplementary Fig. 7**).

99 In contrast to the age-dependent impairment observed in grid cells, entorhinal head  
100 direction cells, which encode the orientation of the animal's head in polar coordinates<sup>10</sup>, did not  
101 differ in their directional tuning or firing rates between groups or across age (**Fig. 2a,**  
102 **Supplementary Fig. 8**). Similarly, there was no difference between groups in the average firing

103 field size of non-grid spatially-tuned neurons, which fire in a non-periodic but spatially reliable  
104 manner (**Fig. 2b, Supplementary Fig. 8**). Mean firing rates did not differ between groups, but  
105 spatial peak firing rates were, however, oddly elevated in adult nTG mice (**Fig. 2b**).

106 To examine if spatial coding by downstream hippocampal place cells was disrupted when  
107 adult APP mice exhibit a degraded grid cell code, we obtained *in vivo* recordings from region CA1  
108 of the hippocampus (n cells = 992) from 6 adult APP and 6 adult nTG mice (*Summary of CA1*  
109 *recordings, Tables 3, 4; CA1 Tetrode locations, Supplementary Fig. 9*). Place cells in adult APP  
110 and nTG mice were similarly tuned for spatial location and had similar peak spatial and mean  
111 firing rates (**Fig. 2c, Supplementary Fig. 8**). Spatial tuning remained largely preserved across  
112 groups when varying our cell selection threshold (spatial peak firing rates between 0 and 8 Hz),  
113 with the exception of thresholds less than 1 Hz (**Fig. 2d**). Mean firing rates were higher in APP  
114 place cells at peak firing selection thresholds of 6 Hz and greater, suggesting that the overall mean  
115 firing rate is higher in adult APP mice than those in adult nTG mice (**Fig. 2d**). These results  
116 demonstrate that the hippocampal place code remains grossly intact when the entorhinal grid code  
117 is degraded in adult APP mice, mirroring findings observed in early development and during  
118 inactivation of the medial septum<sup>24–26</sup>. Our findings are consistent with previous work showing  
119 that the spatial tuning of place cells in Tg2576 APP mice remained intact at the earliest  
120 incidence of A $\beta$  plaques, but was subsequently impaired when A $\beta$  plaques become  
121 widespread<sup>27</sup>. Moreover, our results suggest that impaired grid coding in adult APP mice is not  
122 the result of disrupted feedback from the hippocampus<sup>28</sup>.

123 Prior work has reported a selective disruption of grid cell spatial periodicity without  
124 impairment of other spatial codes when the power of entorhinal theta oscillations (6-10 Hz) is  
125 reduced via inactivation of the medial septum<sup>25,26</sup>. We therefore examined entorhinal theta

126 oscillations across nTG and APP mice and found that theta power remained intact in adult APP  
127 mice across running speeds (ANCOVA, APP-a vs nTG-a, main effect:  $P = 0.99$ ; interaction  
128 between running speed and theta power:  $P = 0.096$ ; APP-a vs APP-y, main effect:  $P = 0.051$ ;  
129 interaction between running speed and theta power:  $P = 0.56$ ; **Fig. 2e**). In both young and adult  
130 APP mice, the overall baseline frequency of theta oscillations was lower while the gain in theta  
131 frequency across running speeds was preserved (ANCOVA, APP-a vs nTG-a, main effect:  $P =$   
132  $0.01$ ; interaction between running speed and frequency:  $P = 0.51$ ; APP-y vs nTG-y, main effect:  
133  $P = 0.0001$ ; interaction between running speed and frequency:  $P = 0.82$ ; **Fig. 2e**), revealing that  
134 the baseline frequency of theta oscillations was reduced in APP mice prior to the onset of grid cell  
135 disruption. Theta frequency reduction in both young and adult APP mice was roughly 0.2 Hz  
136 across all running speeds (**Supplementary Fig. 10**). Assuming that this reduction in theta  
137 frequency has no effect on grid cell periodicity in young APP mice, these results indicate that  
138 impaired grid cell coding in adult APP mice cannot be explained by a disruption of the theta-  
139 generating circuit.

140 Speed cells in the MEC encode the animal's running speed by firing rate and are assumed  
141 to provide a speed signal for grid cell formation<sup>29</sup>. To determine if impaired speed cells could  
142 explain the disrupted grid cell periodicity in adult APP mice, we examined the running speed vs  
143 firing rate correlation of MEC cells that were not characterized as either grid cells, head direction  
144 cells and non-grid spatially-tuned cells (**Supplementary Fig. 11**). No significant differences were  
145 found between groups when varying our cell selection threshold (running speed vs firing rate  
146 correlation values between 0.1 and 0.9), suggesting that MEC speed cells remained unaffected by  
147 APP pathology (**Supplementary Fig. 11a**). Running speed vs firing rate correlations of grid cells

148 was also non-significant between groups, providing further evidence for an intact speed code  
149 **(Supplementary Fig. 11b, c)**.

150 To characterize the nature of reduced grid cell periodicity in adult APP mice, we examined  
151 the spatial firing properties of grid cells in further detail. In contrast to grid cells recorded in adult  
152 nTG mice, grid cells in adult APP mice exhibited larger firing fields when accounting for  
153 differences in spatial scale (**Fig. 3a**). We reasoned that an increase in field size in adult APP mice  
154 could reflect a drifting or unstable grid pattern over time. Consistent with this, a partitioned rate  
155 map stability analysis revealed that the overall grid pattern in adult APP mice exhibited reduced  
156 spatial stability (**Fig. 3b-d**). The reduced stability of grid cells in adult APP mice was not due to  
157 changes in the orientation of grid fields, indicating that instability reflected an inconsistent spatial  
158 phase of the grid pattern over time (**Fig. 3e**). In contrast, non-grid spatially-tuned cells and  
159 hippocampal place cells of adult APP mice remained spatially stable across time (**Fig. 3b-d**). A  
160 two-way ANOVA was conducted to further confirm that the spatial instability was specific to grid  
161 cells, but not non-grid spatially-tuned cells and place cells in adult APP mice. The ANOVA  
162 design's factors consisted of genotype and cell type, and both significant main and interaction  
163 effects were discovered (ANOVA, genotype main effect:  $P = 0.0038$ ; genotype main effect:  $P =$   
164  $0.0084$ ; interaction effect:  $P = 0.013$ , **Supplementary Fig. 12**). Given the significant interaction  
165 effect, post-hoc pairwise comparisons using Tukey's Test revealed greater spatial instability in  
166 APP-a grid cells, but not in APP-a non-grid spatially-tuned cells or place cells (*Tukey's test*, APP-  
167 a grid cells vs. nTG-a grid cells:  $P = 0.0064$ ; APP-a non-grid cells vs. nTG-a non-grid cells:  $P =$   
168  $1$ ; APP-a place cells vs. nTG-a place cells:  $P = 0.99$ ). Instability persisted in adult APP grid cells  
169 when partition lengths were extended from 3 minutes to 5, 6 and 10 minutes (**Supplementary Fig.**  
170 **13**). Consistent with previous literature<sup>30,31</sup>, positional coverage and running speeds were higher

171 in adult APP mice, suggesting that greater displacements were not biased by insufficient  
172 exploration of the open field environment (**Supplementary Fig. 14**).

173 Given that inhibition constitutes a major input for grid cell generation<sup>32,33</sup>, we analyzed the  
174 firing properties of interneurons in APP mice. Across age, mean firing rates became elevated in  
175 adult APP mice (*ANOVA*, genotype main effect:  $P = 0.0038$ ; genotype main effect:  $P = 0.0084$ ;  
176 interaction effect:  $P = 0.013$ , **Supplementary Figs. 15, 16**), alluding to possible changes in  
177 inhibitory networks within the MEC. In particular, we noted that a significant proportion of  
178 interneurons in young and adult APP mice had slower theta rhythmicity and theta power,  
179 suggesting a potential early impairment in spike timing dynamics between grid cells and  
180 interneurons preceding the loss of grid cell spatial periodicity (**Supplementary Fig. 15, 16**). By  
181 computing spike-timing cross-correlations between simultaneously recorded MEC cells, we  
182 observed that synchrony between grid cells and interneurons were qualitatively reduced in young  
183 APP mice in comparison to nTG mice (**Fig. 4a-b**). In fact, young APP grid cells and interneurons  
184 appeared anti-synchronous at a temporal lag of ~25ms, suggesting the start of an early impairment  
185 of the grid cells' ability to integrate inhibitory signals. Surprisingly, the same pattern was also  
186 qualitatively observed between grid cells and head direction cells, which appeared to worsen  
187 across age (**Fig. 4a-b**). However, in both cases, non-parametric statistics between groups could not  
188 directly validate any of these claims (**Fig. 4c**).

189 To better interpret these findings, a two-way ANOVA was conducted to determine the  
190 effects of age and genotype on the mean co-activity within a 25 ms time window for grid cell-  
191 interneuron and grid cell-head direction cell pairs (**Supplementary Fig. 17**). There was no  
192 significant interaction effect in either group (*ANOVA*: grid-interneuron interaction effect:  $P =$   
193  $0.091$ ; grid-head direction interaction effect:  $P = 0.083$ , **Supplementary Fig. 17**), confirming the



194 absence of any age-dependent reduction in synchrony. However, there was a significant main  
195 effect of genotype in both groups, indicating that grid cell-interneuron and grid cell-head direction  
196 cell synchrony were impaired overall in both young and adult APP mice (*ANOVA*: grid-  
197 interneuron genotype main effect:  $P = 0.000013$ ; grid-head direction genotype main effect:  $P =$   
198  $0.012$ , **Supplementary Fig. 17**). In support of this view, synchrony was significantly lower in  
199 adult APP mice compared to adult nTG mice, and was unaffected compared to young APP mice  
200 (**Fig. 4c**). However, the lack of statistical significance between young APP and young nTG mice  
201 implies that this reduction may be milder in the earliest stages of pathology (**Fig. 4c**). These  
202 findings are significant in two ways. First, given the importance of inhibitory and head direction  
203 information for grid cell spatial firing<sup>32-34</sup>, these results suggest that disrupted grid cell spatial  
204 periodicity across age in APP mice (**Fig. 1**) arises in part due to the decoupling of grid cells from  
205 inhibitory and head direction inputs within the local MEC network. Second, this decoupling starts  
206 (albeit mildly) from an age when grid cell spatial periodicity is still intact, suggesting that grid cell  
207 coding is affected at age points preceding the complete loss of spatial periodicity.

208 Prior work has shown that APP mice exhibit spatial memory deficits on the Morris water  
209 maze and the radial arm maze by as early as 3-4 months of age<sup>21,30</sup>. Given the proposed role of  
210 grid cells in supporting path integration<sup>17,35</sup>, we hypothesized that APP mice would also experience  
211 spatial memory deficits related to path integration. To test this hypothesis, we conducted a path  
212 integration task to assess the animals' ability to return directly to their refuge after finding a food  
213 pellet in an open field in complete darkness with an independent, non-implanted cohort of APP  
214 and nTG mice (n mice = 12 APP-y, 9 APP-a, 10 nTG-y, 8 nTG-a; **Fig. 5a, Supplementary Fig.**  
215 **18a**). APP and nTG mice demonstrated a similar inclination to return to the refuge prior to  
216 consumption of the pellet (**Supplementary Fig. 18b-d**). However, we observed that APP mice

217 were impaired in all measures of path integration ability relative to age-matched controls, with the  
218 greatest behavioral deficits in adult APP mice. In particular, the probability of arriving at the  
219 refuge during the initial wall contact decreased in APP mice across age (APP-a: 29%, APP-y:  
220 38%, nTG-y: 58%, nTG-a: 57%; **Fig. 5b, c**), suggesting that they had a greater difficulty in  
221 estimating their position relative to the refuge. In further support of this possibility, adult APP  
222 mice exhibited increased error in both their initial heading direction and the angular difference  
223 between the refuge and the first wall encountered during the return trajectory (**Fig. 5d, e**). With  
224 regards to overall navigational efficiency, adult APP mice travelled longer distances to return to  
225 the refuge and exhibited greater thigmotaxis by spending a larger proportion of the return path  
226 along the periphery of the environment (**Fig. 5d, e**). All groups showed improved performance  
227 when visual cues were made available (**Supplementary Fig. 19**), though APP mice remained  
228 impaired across all measures of task performance which worsened with age (**Supplementary Fig.**  
229 **20**). Together, these results show that path integration abilities decline with age in APP mice,  
230 closely mirroring the time course of the spatial coding deficits observed in the grid cell network.

231 Lastly, we characterized which molecular changes could explain these early network  
232 alterations in the entorhinal-hippocampal circuit. A recent meta-analysis confirmed that synapse  
233 loss and changes in synaptic marker expression are major events in AD pathogenesis<sup>36</sup>. Likewise,  
234 altered synaptic function could also affect circuit function such as grid cell coding that is known  
235 to require both excitatory and inhibitory drive<sup>28,32,33</sup>. For these reasons, we carried out  
236 immunohistochemistry in the MEC and CA1 to visualize and quantify the expression of synaptic  
237 markers that include VGLUT1, VGLUT3, VACHT, VGAT and NR1 (**Supplementary Fig. 21**).  
238 VGLUT1, VGLUT3 VACHT and VGAT are neurotransmitter transporters whereas NR1 is a  
239 subunit of NMDA receptors that was previously shown to be necessary for both grid cell integrity

240 and path integration ability<sup>35</sup> (detailed marker descriptions in Methods,  
241 *Immunohistochemical labelling of synaptic markers*).

242 To interpret the most robust pathological changes, we ran linear mixed models to pinpoint  
243 which marker expression levels were most affected by early A $\beta$  pathology. Out of the ten  
244 experimental groups, two cases were significantly modulated by the effect of the subject's  
245 genotype: VGLUT3 in the MEC and VGLUT1 in CA1 (*VGLUT3 in MEC*, genotype effect:  $P <$   
246  $0.01$ ; *VGLUT1 in CA1*, genotype effect:  $P < 0.01$ ; **Supplementary Fig. 22**). We observed an  
247 increase of VGLUT3 in both young and aged APP mice, indicating that CCK-positive interneurons  
248 are exerting greater influence in inhibitory circuits within the MEC (**Supplementary Fig. 23a,**  
249 **b, Supplementary Fig. 24**). However, VGAT levels were not significantly different  
250 (**Supplementary Figs. 21, 22**), suggesting that early A $\beta$  pathology targets a specific inhibitory  
251 circuit while sparing overall inhibitory drive. Taken together with our spike time cross-correlation  
252 analysis (**Fig. 4**), these findings pinpoint inhibitory mechanisms as one of the earliest network  
253 changes in the MEC. An increase of VGLUT1 was also detected in CA1 of young APP mice that  
254 stayed elevated across age (**Supplementary Figs. 22, 23a, c**). This finding explains the higher  
255 mean firing rate of adult APP place cells (**Fig. 2d**), and supports existing evidence showing that  
256 hyperexcitability is a major pathological symptom of AD<sup>37</sup>. Taken together, these results provide  
257 an in-depth overview of the early network changes in the MEC-hippocampal circuit susceptible to  
258 A $\beta$  pathology at the molecular, physiological, and behavioral levels.

259  
260  
261  
262

263 **Discussion**

264 To identify the impact of A $\beta$  pathology on neural coding in the MEC-hippocampal  
265 circuit, we obtained single-unit recordings during the initial stages of disease in an APP mouse  
266 model of familial AD. These data revealed a disruption in entorhinal grid cell coding when initial  
267 A $\beta$  fibrils are detected. In contrast, the spatial tuning of other functional cell types in the MEC  
268 and region CA1 of the hippocampus was preserved. Theta power and modulation of theta by  
269 running speed remained intact in adult APP mice, yet grid cells exhibited reduced theta  
270 rhythmicity and spatial stability. Grid cells in young and adult APP mice were decoupled from  
271 interneurons and head direction cells. These changes in grid cell coding corresponded with  
272 impaired performance of adult APP mice in a path integration task. Together, these results  
273 reveal that early A $\beta$  pathology targets the entorhinal grid cell network within the MEC-  
274 hippocampal circuit.

275 Our results address several possible circuit-level explanations that could underlie  
276 reduced grid cell coding in APP mice. Prior studies have shown that inputs from the anterior  
277 thalamic nuclei (ATN), the dorsal hippocampus, and the medial septum are each  
278 independently necessary for normal grid cell function. Entorhinal head direction cells, which  
279 are dependent on direct and indirect inputs from the ATN<sup>34</sup>, were preserved in adult APP  
280 mice, suggesting that projections from the ATN were intact. Place cells in the dorsal  
281 hippocampus remained spatially selective, stable, and had high firing rates, indicating that  
282 reduced feedback from the hippocampus cannot explain grid cell deficits in adult APP mice<sup>28</sup>.  
283 Finally, theta power and speed modulation of theta were preserved in adult APP mice,  
284 suggesting that medial septal theta-generating inputs to the MEC are conserved<sup>25,26</sup>.  
285 Nevertheless, our findings could still indicate a subtle impairment of basal forebrain inputs

286 that innervate the grid cell network; one candidate could be decreased septal cholinergic  
287 inputs<sup>38</sup>, as a selective loss of basal forebrain cholinergic neurons in the nucleus basalis of  
288 Meynert is observed in familial AD patients<sup>39,40</sup>.

289 We also observed that grid cells recorded in APP mice had reduced spike-timing  
290 synchrony with interneurons and head direction cells. This is interesting because interneuron  
291 mean firing rates and head direction directional selectivity were not lower in APP mice. These  
292 results are particularly significant because grid cells require excitatory, inhibitory and head  
293 direction inputs<sup>28,32-34</sup>. The decoupling of grid cells from interneurons and head direction cells  
294 therefore provides a network-level explanation for the reduced grid cell spatial periodicity and  
295 stability observed in adult APP mice. On that note, we could not analyze grid cell-place cell  
296 synchrony, given that we did not record from the MEC and CA1 simultaneously. This decoupling  
297 is also weakly present in young APP mice (as suggested by a two-way ANOVA, but  
298 insignificant via direct non-parametric testing), alluding to the possibility that grid cell coding  
299 is impaired prior to the complete loss of spatial periodicity. It could be that the decoupling effect  
300 is progressive and worsens with age, but we cannot directly confirm this idea with the current data  
301 and the lack of a significant effect size in young APP mice.

302 We also characterized whether local network-level changes can be accounted for at the  
303 molecular level. Based on our quantification of synaptic markers, VGLUT3 levels were  
304 pathologically elevated in the MEC of APP mice. These findings pinpoint specific inhibitory  
305 mechanisms as one of the earliest network changes in the MEC, as VGAT levels indicative of  
306 global inhibition were unaltered. However, these findings are hard to relate to the observed grid  
307 cell impairment. On the other hand, an increase of VGLUT1 was also detected in CA1 of young  
308 APP mice that stayed elevated across age. This finding explains the higher mean firing rates of

309 adult APP place cells and is consistent with the hypothesis that hyperexcitability is a major  
310 pathological symptom of AD<sup>37</sup>. We applied a linear mixed model and only considered marker  
311 expression levels that were significantly modulated by the subject's genotype. By doing so, a more  
312 subtle effect amongst other markers might have been deliberately missed. For instance, there was  
313 a slightly lower NR1 expression in adult APP mice relative to adult nTG mice, and it is known  
314 that this NMDA receptor subunit is necessary for grid cell firing<sup>35</sup>.

315 Our results suggest that grid cells contribute to path integration, and possibly other  
316 forms of spatial memory. Young APP mice were modestly impaired in our path integration task  
317 despite an intact grid cell spatial periodicity. In parallel, prior work has shown spatial memory  
318 impairments in this APP mouse line at the same age in the radial arm and Morris water mazes<sup>21,30</sup>.  
319 An early disruption of the spike-timing relationship between grid cells and other MEC cell types  
320 in young APP mice could potentially underlie these behavioral impairments. Likewise, reduced  
321 grid cell spatial periodicity and stability could explain the pronounced path integration  
322 impairments in adult APP mice. Our behavioral data showed that in addition to increased travel  
323 distance and angular errors in the return path, adult APP mice spent more time along the  
324 environment periphery. This suggests that adult APP mice could not plan effective routes back to  
325 the refuge and instead adopted a thigmotaxic strategy. The severity of grid cell deficits paralleling  
326 the worsened behavioral performance provides compelling evidence to suggest that this  
327 microcircuit is linked to path integration and perhaps other forms of spatial memory. There are  
328 likely other undetermined factors that explain the spatial memory impairment observed in these  
329 mice at a young age, but our findings are consistent with the current understanding of how grid  
330 cells are necessary for proper path integration function<sup>17,35</sup>.

331           Of particular importance, our results reveal that A $\beta$ -mediated perturbations at the  
332 synaptic level do not uniformly impact neural computations. APP mice express soluble A $\beta$   
333 oligomers throughout the entorhinal cortex and exhibit a reduced density of presynaptic  
334 terminals and neuronal loss across all entorhinal layers by 6 months of age<sup>20</sup>, yet only the grid  
335 cell subnetwork within the MEC was disrupted. Similar and widespread changes are observed  
336 throughout the hippocampus, but the spatial coding of place cells was not disrupted.

337           Place cells have also been recorded in other APP-related mouse models. The spatial  
338 tuning of place cells in the Tg2576 APP mouse model remained intact at the earliest incidence  
339 of A $\beta$  plaques<sup>27</sup>, similar to our results. However, differences in place cell physiology have  
340 also been reported. In the 3xTg triple transgenic mouse model displaying both APP and tau  
341 pathology, place cells exhibited spatial instability on a linear track preceding the detection of  
342 plaques which seems to be in conflict with our findings<sup>41</sup>. One explanation for this difference  
343 is environmental influence. As the mouse's freedom of movement is constrained on a one-  
344 dimensional track, the direction of instability is spatially restricted. In contrast, instability in an  
345 open field can occur in 360 degrees and averaging these directional shifts over time may ultimately  
346 cancel out to give the impression that APP place cells are stable. It could be that a linear track is  
347 more sensitive at detecting precise changes in place cell stability that may not meaningfully impact  
348 overall spatial coding in a two-dimensional environment. Alternatively, this difference could be  
349 due to the presence of tau pathology in 3xTg mice. In a different study involving a chimeric  
350 APP mouse model where the onset of APP expression could be controlled, place cell stability  
351 was also impaired on a linear track<sup>42</sup>. However, this disruption took place 9.5 months  
352 following APP expression, a pathogenic timepoint that is much later than ours which could  
353 explain their results. Lastly, a study reported that grid cells and place cells were disrupted in an

354 APP knock-in mouse model<sup>43</sup>. Despite already have moderate levels of plaque formation  
355 throughout the brain, these young APP knock-in mice still did not show any impaired place cell  
356 coding, which are consistent with our findings.

357 It is certain that inherent differences within mouse models may contribute to variability  
358 between results<sup>41,42</sup>, but so can the experimental design. Our place cell results are best  
359 comparable to those recorded from Tg2576 mice<sup>27</sup> because recordings were done in an open  
360 field during the earliest detection of amyloid plaques. From this perspective, our results are  
361 consistent with what is currently known about A $\beta$  pathology and place cell coding. To this  
362 growing body of knowledge, we show that impairments in grid cell firing emerge prior to  
363 place cell disruption. Importantly, both extracellular and intracellular A $\beta$ -related processes may  
364 be pathogenic drivers of the reported network changes and should be further investigated.  
365 Despite the popular belief that extracellular A $\beta$  initiates many aspects of pathology, there is a  
366 wide body of evidence showing that intracellular A $\beta$  does the same<sup>44-47</sup>.

367 Importantly, functional magnetic resonance imaging (fMRI) has revealed that the lateral  
368 entorhinal cortex (LEC) could be the first region affected in early AD<sup>48</sup>. The LEC is an important  
369 node in the entorhinal-hippocampal circuit and has also been studied in APP mouse models. In  
370 PDAPP mice, the location of amyloid deposits in the dentate gyrus greatly coincided with the  
371 termination of afferent projections from the LEC<sup>49</sup>. In terms of single-unit physiology, a report  
372 showed cells in Tg2576 mice displayed hyperactivity in the LEC by as early as 3 months of age<sup>50</sup>.  
373 Physiological changes in the LEC as a result of A $\beta$  may precede the reported grid cell impairments  
374 and merit further investigation.

375 There is concern over the use of transgenic APP mouse models that overexpress non-  
376 physiological A $\beta$  given the recent APP mutation knock-in mice which express pathological



377 profiles that are more faithful of AD pathogenesis. Here, we took advantage of the robust  
378 phenotypic nature of transgenic APP mice to identify the specific parts of the MEC-  
379 hippocampal spatial coding circuit most impacted by APP mutations. In parallel, AD is a  
380 multifaceted neurodegenerative disease marked by several mechanisms that contribute to  
381 impaired neural function. In particular, AD is characterized by widespread neurofibrillary  
382 tangles consisting of the hyperphosphorylated-tau protein. Prior work using a tau transgenic  
383 mouse line has shown that grid cell spatial coding is preserved when tau is initially restricted  
384 to axonal and somatodendritic compartments, but is subsequently impaired once tau has  
385 accumulated extensively in entorhinal cell bodies<sup>51</sup>. Our observations are consistent with  
386 reports on multi-study validation of data-driven disease progression in human AD  
387 patients<sup>52,53</sup>. The model predicts that cohorts of familial AD and *APOE*- $\epsilon$ 4-positive subjects  
388 exhibit cerebrospinal fluid biomarkers in a distinct sequence: amyloid- $\beta$ 1–42, phosphorylated  
389 tau, and then total tau. However, in the broader AD population, total tau and phosphorylated  
390 tau are found to be earlier biomarkers than A $\beta$ . The combined findings that early A $\beta$  and  
391 advanced tau pathologies each independently target the grid cell network highlight the  
392 vulnerability of this entorhinal subnetwork and raise the possibility that spatial memory  
393 deficits in AD are linked directly to grid cell integrity. Indeed, functional imaging in young  
394 adults at genetic risk of AD (*APOE*- $\epsilon$ 4 carriers) revealed a reduced grid-like hexa-symmetric  
395 signal in the MEC that correlated with spatial memory and path integration impairments<sup>54–56</sup>.  
396 These convergent lines of evidence support the viability of grid cell integrity and spatial  
397 navigation deficits as early markers of AD<sup>4</sup>, and as dependent variables to assess the efficacy  
398 of AD therapeutics.

399

400 **Methods**

401 ***Subjects***

402 J20 APP male mice (B6.Cg-Zbtb20 Tg(PDGFB-APP<sup>SwInd</sup>) 20Lms/2Mmjax) were obtained  
403 from Jackson Laboratories (MMRRC stock #34836) and bred with female C57/BL6/j mice. Mice  
404 were individually housed on a 12-h light/dark cycle and underwent experiments during the light  
405 cycle. All experimental procedures were performed in accordance with McGill University and  
406 Douglas Hospital Research Centre Animal Use and Care Committee (protocol #2015-7725) and  
407 in accordance with Canadian Institutes of Health Research guidelines.

408 In J20 mice, layers 2, 3 and 5 of the MEC undergo progressive neuronal loss and by 7.5  
409 months of age, all layers experienced a combined loss of 16.3% in comparison to age-matched  
410 controls<sup>18</sup>. The entorhinal cortex as a whole exhibits a reduced density of presynaptic  
411 terminals (quantified by synaptophysin-immunoreactivity) by 7 months of age<sup>20</sup>. Similarly,  
412 by 6 months of age, region CA1 of the hippocampus in APP mice exhibits a 10%+ loss of  
413 neurons compared to age-matched controls<sup>21</sup>. Synapse loss is observed as early as 3 months  
414 of age in CA1, confirmed both by synaptic marker-immunoreactivity and electron  
415 microscopy<sup>22</sup>. In addition to these processes, the complement-dependent pathway and  
416 microglia undergo aberrant upregulation that is dependent on soluble A $\beta$  oligomeric levels in  
417 the hippocampus<sup>22</sup>. Furthermore, gliosis (activated astrocytes) and neuroinflammation  
418 (activated microglia) become elevated across age in the hippocampus of 6-month-old APP  
419 mice<sup>21</sup>. Lastly, *in vitro* slice electrophysiology experiments revealed that both basal synaptic  
420 transmission recorded in CA1 and long-term potentiation in the Schaffer collateral–CA1  
421 synapse are impaired in 3 month-old APP mice<sup>23</sup>. To examine the impact of these A $\beta$ -

422 mediated changes on neural coding circuit during these early stages of A $\beta$  pathology, we  
423 focused on APP mice between 3-7 months of age.

424 Single-unit recording data in the (MEC) were collected from 68 APP mice and littermates with  
425 negative transgene expression across four experimental groups: young APP mice (3-4.5 months of  
426 age), adult APP mice (4.5-7 months of age), young non-transgenic (nTG) mice (3-4.5 months of  
427 age), adult nTG mice (4.5-7 months of age). 31 males and 37 females were used. Some animals  
428 fell into multiple age groups. The male/female ratios were 5:5, 16:16, 4:7, and 9:10 for young APP,  
429 adult APP, young nTG, and adult nTG mice respectively. Single-unit recording data in region CA1  
430 of the hippocampus were collected from six adult APP mice (3:3 male/female ratio) and six adult  
431 nTG mice (2:4 male/female ratio).

432 A separate, non-implanted cohort of APP and nTG mice were tested in the path integration  
433 behavior task. Mice were separated into the same four experimental groups defined above. The  
434 male/female ratios were 6:6, 6:3, 5:5, and 4:4 for young APP, adult APP, young nTG, and adult  
435 nTG mice respectively.

### 436 *Surgery*

437 On the day of surgery, mice were anesthetized with isoflurane (0.5% - 3% in O<sub>2</sub>) and administered  
438 carprofen (0.01 ml/g) subcutaneously. For each mouse, three anchor screws were secured to the  
439 skull and a ground wire was positioned either above the cerebellum at midline position or the left  
440 visual cortex. A 'versadrive' containing four independently movable tetrodes (Axona, Inc) was  
441 implanted on top of the right MEC at the following stereotaxic coordinates: 3.4 mm lateral to the  
442 midline, 0.25-0.40 mm anterior to the transverse sinus. For hippocampal implants, the versadrive  
443 was implanted on top of the right CA1 at the following stereotaxic coordinates: 1.5 mm lateral to

444 the midline, 1.9 mm posterior from bregma. Tetrodes were gold-plated to lower impedances to  
445 150-250 k $\Omega$  at 1 kHz prior to surgery. The versadrive was angled at eight degrees in the posterior  
446 direction for MEC implants and was not angled for CA1 implants. Following placement, the  
447 versadrive was secured in place using Kwik-Sil (to prevent exposure of the brain) and dental  
448 acrylic (to secure the versadrive to the skull and anchor screws). The ground wire was soldered to  
449 the implant, and tetrodes were lowered 1.0 mm and 0.5 mm from the dorsal surface for the MEC  
450 and CA1 respectively. All surgical procedures were performed in accordance with McGill  
451 University and Douglas Hospital Research Centre Animal Use and Care Committee (protocol  
452 #2015-7725) and in accordance with Canadian Institutes of Health Research guidelines.

### 453 ***Neural Recordings***

454 Three days post-surgery, mice were placed on water restriction and maintained at 85% of their *ad*  
455 *libidum* weight for the duration of experiments. Mice were tested in six different open field  
456 environments. The majority of MEC recordings were done in a 75 x 75 cm box (1109 recordings),  
457 but a number of them also took place in a ten-sided maze with a 63.8 diameter (9 recordings), a 50  
458 x 50cm box (121 recordings), a 84 x 84 cm box (23 recordings), a 90 x 90 cm box (1 recording),  
459 and a 100 x 100 cm box (58 recordings). All CA1 recordings were done in the same 75 x 75 cm  
460 box. As mice explored their environments, water droplets were randomly scatter throughout to  
461 motivate the subjects to adequately sample the entire open field. Once mice reliably provided good  
462 trajectory coverage, tetrodes were turned quickly until theta rhythmic units were observed which  
463 indicated that the tetrodes had entered the MEC. Tetrodes were then advanced in increments of 25  
464 microns to sample new putative MEC neurons, which was later confirmed by histology. For the  
465 CA1 cohort, sleep recordings were carried out prior to open field exploration to detect sharp wave  
466 and ripple activity. Once ripple amplitude was stable across days, tetrodes were no longer turned.

467 Occasionally, tetrodes were either advanced or retracted depending on fluctuations in ripple  
468 amplitude and unit activity. In most cases for both MEC and CA1 recordings, neurons were not  
469 stable enough between recordings to reliably determine whether cells were re-sampled across days  
470 and thus we have included all cells recorded into our analysis.

471 To record spikes and local field potentials, versadrives were connected to a multichannel amplifier  
472 tethered to a digital Neuralynx (Bozeman, MT) recording system. Signals were amplified and  
473 band-pass filtered between 0.6 kHz and 6 kHz. Spike waveform thresholds were adjusted before  
474 commencing each recording and ranged between 35-140  $\mu$ V depending on unit activity.  
475 Waveforms that crossed threshold were digitized at 32 kHz and recorded across all four channels  
476 of the given tetrode. Local field potentials were recorded across all tetrodes.

#### 477 *Histology*

478 Animals were anesthetized with Isoflurane and perfused intracardially using saline, followed by  
479 4% paraformaldehyde. Animal heads were left in 4% paraformaldehyde for between 24-72 hours  
480 following perfusion, before brains were extracted. Brains were left to sink in a 30% sucrose  
481 solution, and then frozen and stored in a -80°C freezer. Sagittal brain sections (40 $\mu$ m) were sliced  
482 using a cryostat and Nissl-stained with a Cresyl violet solution. In cases where brain slices  
483 repeatedly came off the glass slides during Nissl-staining, slices were instead mounted using a  
484 fluorescent DAPI labeling mounting medium.

485 Tetrode tracks were characterized to be in either the superficial or deep layers based on the location  
486 of the track tip. Only data collected from tetrodes within the MEC were included in the analysis.

487 For hippocampal recordings, all tetrode tips that picked up single-units were determined to be in  
488 region CA1 of the dorsal hippocampus. Tips from tetrodes located outside of CA1 did not pick up  
489 any single-units.

### 490 *Comparisons*

491 Unit recording data was analyzed and compared across young and aged APP and nTG mice. All  
492 comparisons between baseline and other conditions used unpaired Wilcoxon rank sum tests with  
493 Bonferroni-Holm corrections for multiple comparisons with an alpha value of 0.05. Two-way  
494 unbalanced analysis of variance (ANOVA) tests were performed to detect any interaction effects  
495 between the subject's age and genotype on spatial tuning scores. Two-way unbalanced ANOVA  
496 tests were also performed to detect any interaction effects between the subject's genotype and cell  
497 type on spatial stability of grid, non-grid, and place cells. Analysis of co-variance (ANCOVA)  
498 tests were performed to compare speed modulation of theta power and theta frequency across  
499 groups. Wilcoxon rank sum tests with Bonferroni-Holm corrections for multiple comparisons with  
500 an alpha value of 0.05 were performed for all path integration behavioral and  
501 immunohistochemical analyses. Two-way unbalanced ANOVA tests were performed to detect  
502 any interaction effects between the subject's age and genotype on synaptic marker expression. The  
503 fitlme function in MATLAB was used to perform linear mixed effects analyses on the relationship  
504 between the subjects' genotype, age and synaptic marker expression. The fixed effects of the model  
505 comprised genotype and age (without interaction between the two). The random effects of the  
506 model comprised random intercepts by-subject, random slopes for the effects of genotype and age  
507 by-subject, and independence between the intercepts and slopes. P-values obtained in the model  
508 output were considered as the measurements for significance.

### 509 *Spike sorting*

510 Single-units were isolated ‘offline’ manually using graphical cluster cutting software (Plexon, Inc)  
511 individually for each recording session. Neurons were separated based on the peak amplitude and  
512 principal component measures of spike waveforms. Evaluation of the presence of biologically  
513 realistic interspike intervals, temporal autocorrelations, and cross correlations was used to confirm  
514 single-unit isolation. The experimenter was blind to the age and genotype of the subjects and only  
515 well-separated clusters were included in analysis.

### 516 *Position, direction and velocity estimation*

517 For all electrophysiological recordings, positional data was acquired at 30 frames per second at  
518 720 x 480 pixel resolution (4.9 pixels per cm) using a camera purchased from Neuralynx  
519 (Bozeman, MT). The estimated position of the animal was calculated as the centroid of a group of  
520 red and green diodes positioned on the recording head stage. Head direction was calculated as the  
521 angle between the red and green diodes. Up to five lost samples due to occlusion of tracking LEDs,  
522 or reflections in the environment were replaced by a linear interpolation for both position and  
523 directional data. Running velocity was calculated using a Kalman filter. Rate maps were  
524 constructed by calculating the occupancy-normalized firing rate for 3cm x 3cm bins of position  
525 data. Data were smoothed by a two-dimensional convolution with a pseudo-Gaussian kernel  
526 involving a three pixel (9 cm) standard deviation. To visualize periodicity of grid fields, we  
527 computed the spatial autocorrelation of the smoothed rate maps using Pearson’s product moment  
528 correlation coefficient as described in Supplementary Fig. 3.

### 529 *Gridness score*

530 To quantify the spatial periodicity of MEC neurons, we calculated a ‘gridness score’ as described  
531 in Brandon et al., 2011<sup>25</sup>. Briefly, this metric quantifies the hexagonal spatial periodicity in firing  
532 rate maps, while also accounting for elliptical eccentricity along one of two mirror lines that exist

533 in a hexagonal lattice structure. Distortion along one of the mirror lines was corrected after  
534 determining the major and minor axes of the grid based on the six fields closest to the central peak  
535 of the rate map autocorrelogram. The entire autocorrelogram was compressed along the major axis  
536 so that the major axis became equal to the minor axis. Large eccentricities (where the minor axis  
537 was less than half of the major axis) were not corrected. From the compressed autocorrelogram,  
538 we extracted a ring that encased the six peaks closest to the center peak but excluded the central  
539 peak to report periodicity between fields. We then calculated a rotational autocorrelation of this  
540 ring and observed the periodicity in paired pixel correlations across 180 degrees of rotation. The  
541 gridness score was computed as the difference between the lowest correlation observed at 60 or  
542 120 degrees of rotation and the highest correlation observed at 30, 90, or 150 degrees of rotation.  
543 To ensure that our finding that grid cell reduction was not observed because of double-sampling  
544 grid cells across recording sessions, we made efforts to reduce putative double-sampling.  
545 Recordings of grid cells with cluster centroids within 0.2mV on subsequent days were considered  
546 to be putative duplicate recordings, and the grid cell recording with the best separation index was  
547 chosen for statistics on gridness across groups in Supplementary Fig. 7. We used the full set of  
548 recordings for all other analyses.

### 549 ***Directionality***

550 Polar histograms of firing rate by head direction were generated to visualize the pattern of spiking  
551 dependent upon the animal's direction. To construct the polar plots, head direction was collected  
552 into bins of 6 degrees and the number of spikes in each bin was divided by the time spent facing  
553 that direction. The mean resultant length (MRL) of the polar plot was taken as a metric of head  
554 direction selectivity.

### 555 ***Cell selection***



556 We categorized each entorhinal neuron as a grid cell, head direction cell, or non-grid spatially-  
557 tuned cell. We performed a shuffling procedure to set significance criteria to determine grid cells  
558 and head direction cells. Spike trains from each neuron recorded were randomly shifted in time by  
559 at least 30 seconds. We then calculated gridness and directionality measures. This process was  
560 repeated 50 times for each neuron, and the 99<sup>th</sup> percentile of the resulting distribution of scores  
561 was determined as the significance criteria for both measures. This results in a gridness threshold  
562 of 0.54 and directionality threshold of 0.21 which we used to define grid cells and head direction  
563 cells in our full dataset. Any cell recorded in the MEC which did not qualify as a grid cell but had  
564 a split-half correlation  $\geq 0.6$  was categorized as a non-grid spatially-tuned cell. Putative  
565 interneurons in the MEC were selected by having a narrow wave form ( $<0.3\text{ms}$ ) and a mean firing  
566 rate of at least 0.5 Hz. Hippocampal neurons were classified as putative place cells if they had 1)  
567 a minimum mean firing rate of 0.1 Hz, 2) a maximum mean firing rate of 5.0 Hz, and 3) a spatial  
568 peak rate of greater than 5.0 Hz. Duplicate place cells sampled across recording sessions were  
569 removed for Fig. 2d and Fig. 3d.

### 570 *Spatial 2D displacement analysis*

571 To quantify noise in the two-dimensional (2D) phase of grid cells (and other cell types) on short  
572 timescales, we began by dividing the first 30 minutes of each recording into 10 epochs of three  
573 minutes each. For each epoch, we computed the resulting rate map. Next, for all pairwise  
574 comparisons of epoch rate maps, we computed the spatial cross-correlation between rate maps  
575 over a window of  $\pm 5$  pixel ( $\pm 15$  cm) lags in both dimensions. The peak of this cross-correlogram  
576 captures the 2D translation necessary to best align the current pair of rate maps. Because the  
577 periodic nature of the grid pattern might lead to multiple local maxima in the cross-correlogram,  
578 we first computed the patch of correlation values nearest the center for which all contiguous

579 correlation values were at least 50% of the maximum correlation value. We then chose the  
580 maximum correlation in this patch as our peak. The distance from the center (no difference in  
581 alignment) to this peak was computed as our measure of 2D phase-shift between these epochs. The  
582 average across all pairwise comparisons of epochs was then the final measure of 2D phase noise  
583 for that cell.

#### 584 *Speed modulation of theta power and frequency*

585 Local field potential traces obtained from the MEC were referenced to a cortical reference  
586 electrode and downsampled to 500 Hz. Power between 1-15Hz was calculated using a Morlett  
587 Wavelet with a 0.25 Hz bandwidth to obtain a power spectrum for each sample. Theta-by-Speed  
588 spectrograms were calculated as the power between 5-15 Hz divided by power in the delta band  
589 (2-4 Hz) across running speeds. The average Theta-by-Speed spectrogram is show in Fig. 2e. To  
590 quantify speed modulation of theta power, the mean power between 7-12 Hz across speeds was  
591 extracted from each Theta-by-Speed spectrogram across speeds (**Fig. 2e**). To quantify speed  
592 modulation of theta frequency, the frequency of the peak power for each running speed was  
593 extracted from the Theta-by-Speed spectrogram (**Fig. 2e**). Analysis of co-variance (ANCOVA)  
594 was performed on these extracted data.

#### 595 *Single-cell temporal autocorrelations and intrinsic frequency*

596 The spike times of each cell were binned at 5ms intervals and the temporal autocorrelation for the  
597 given spike train was computed. The obtained signal was smoothed by a Gaussian kernel with 2  
598 bin standard deviation, zero padded to  $2^{13}$  samples and the power spectrum was calculated using  
599 the Chronux toolbox function MTSPECTRUMC from Matlab. The intrinsic frequency of a given  
600 cell was then taken as the frequency with the max power in the 6-12 Hz range.

601 ***Cross-correlations and synchrony analysis***

602 To examine spiking synchrony unbiased cross-correlations were computed between  
603 simultaneously recorded grid cells, head direction cells, and putative interneurons with 5ms  
604 temporal bins from a lag of -400 to 400ms. The resulting cross-correlations were convolved with  
605 a 25ms gaussian and normalized to their median absolute deviation for comparison.

606 ***Path Integration Task***

607 Data were collected in a ten-sided maze (diameter = 63.8 cm) surrounded by black curtains. Steel  
608 bars were screwed into the walls of the testing room and hovered over the maze. A plastic base  
609 was positioned on these bars and acting as the ceiling for the maze. On this ceiling, an infrared  
610 camera purchased from Neuralynx was positioned and acquired positional data at 30 frames per  
611 second at 720 x 480 pixel resolution (6.13 pixels per cm). Black curtains were positioned on top  
612 and around this plastic base which draped over the maze and ensured a complete darkness  
613 environment. Within the maze, 10 refuge enclosures connected to the open environment were  
614 closed off by top-down sliding doors that acted as walls. For all trials, the same refuge was used  
615 for each subject. When the door was slid open, the mouse could voluntarily enter or exit the refuge  
616 by their own volition. The height of these walls (and the entire maze throughout) was 27.6 cm.

617 Mice were placed on food restriction and maintained at 85% of their *ad libidum* weight throughout  
618 training and testing phases. In each trial, the mouse was kept in the same refuge enclosure separated  
619 from the open environment by the sliding door. The maze was operated in darkness via a pulley  
620 system which consisted of a rope fastened to the top of the sliding door. This rope extended outside  
621 of the curtains by passing through 2 clamps that were installed along the steel bars above the maze.  
622 This setup mimicked a pulley system where the experimenter could pull on the rope and open the  
623 sliding door while the curtains were draped over the maze. The handle of the rope end was twisted

624 into a knot; at the start of each trial, the rope was pulled, and the knot was looped onto a third  
625 clamp fastened to a table post. Doing so kept the sliding door held up throughout the duration of  
626 each trial. At the end of a trial, the knot was lifted from the clamp which closed the door. This  
627 setup allowed the experimenter to quickly operate the door without needing to physically interact  
628 with the maze.

629 Once the mouse was let into the open environment, it had to forage for a randomly placed small  
630 food pellet and return to the refuge prior to consumption. These food pellets were the same kind  
631 as administered in the subjects' cages, but smaller in size weighing less than 0.2 g. Successful  
632 trials were defined as events where the mouse picked up the food pellet and navigated to the refuge  
633 before consumption. Failed trials were defined as events where the mouse failed to return to its  
634 refuge before consuming the pellet. Incomplete trials were defined as events where the mouse  
635 failed to retrieve the pellet before returning to its refuge.

636 Visual cues were set up along the walls of the environment to allow for increased allocentric-  
637 guided behavior in the light trials. The three visual cues used consisted of a triangle, square, and  
638 three stripes constructed using tape and were positioned on three almost-equally spaced walls  
639 (given that the environment is ten-sided, a cue couldn't be completely equally-spaced from the  
640 other two). White noise played throughout all trials to account for potential auditory cues that may  
641 affect the mouse's return trajectory. Furthermore, the maze environment was wiped using  
642 Peroxyguard following every five consecutive trials to reduce the extent to which olfactory cues  
643 influenced behavior. In light trials, room lighting was turned on and the curtains were pushed to  
644 the side. In dark trials, room lighting was turned off and the curtains completely covered the arena.  
645 The mouse's movements were tracked using an overhead infrared camera, and the maze was lit  
646 using an infrared light.

647 *Path Integration Behaviour Timecourse.* Mice reached 85% of their *ad libidum* weight before  
648 experiments commenced. Mice first underwent a training phase where they achieved a minimum  
649 of eight successful trials out of ten total complete trials within a session in light conditions.  
650 Incomplete trials did not count as a completed trial. Mice went through consecutive light training  
651 days until they reached the success criteria. During failed trials, the experimenter punished the  
652 mouse by holding it by the tail suspended in air for ten seconds before placing it back into the  
653 refuge.

654 Following light training, mice then underwent five consecutive days of dark training. The same  
655 protocol as the light training applied to dark training. Mice were required to achieve a minimum  
656 of eight successful trials out of ten total complete trials within a session in any of the five days.  
657 All mice reported in the dataset achieved success criteria. Four mice that did not pass the training  
658 criteria were excluded from analysis. These mice included two young nTG mice, one young APP  
659 mouse, and one aged APP mouse.

660 Following dark training, mice then underwent five consecutive days of light and dark testing. In  
661 days 1, 3 and 5, five light trials were conducted, followed by five dark trials. Incomplete trials  
662 counted as trials. This was repeated until the mouse achieved ten complete trials in each of the  
663 light and dark conditions. On days 2 and 4, the same protocol applied, but the mouse started with  
664 five dark trials, followed by five light trials.

### 665 ***Analysis of Behavior Testing***

666 All path integration behavioral data were recorded at 30 frames per second. The positional  
667 coordinates of the mice for each trial were obtained using an open-source deep learning tracker  
668 algorithm called DeepLabCut<sup>57</sup>. DeepLabCut was only used to quantify positional data in the path

669 integration task and not for electrophysiological recordings. Custom MATLAB scripts were used  
670 to analyze various behavioral parameters from the mice's positional data.

### 671 ***Genotyping***

672 Tail samples were collected at weaning for genotyping, and just prior to brain perfusion for  
673 additional confirmation. DNA sample were extracted and amplified using the REExtract-N-  
674 Amp™ Tissue PCR Kit (MilliporeSigma, XNAT-100RXN) and the primer sequence and PCR  
675 protocol provided by The Jackson Laboratory (MMRRC, 34836-JAX). Genotyping results were  
676 visualized using a QIAxcel instrument (Qiagen).

### 677 ***Immunofluorescence***

678 Mice were anesthetized with Isoflurane (Baxter, FDG9623) and intracardially perfused with 0.05%  
679 heparin (Sandoz, 10750) in ice-cold saline followed up cold and filtered 4% paraformaldehyde  
680 that was freshly made from powder (MilliporeSigma, 158127-500g). Extracted brains were  
681 cryopreserved in 30% sucrose (MilliporeSigma, S0389-1Kg), flash frozen in 2-methylbutane  
682 (Fisher Scientific, 03551-4), and kept at -80°C until sliced on a cryostat (Leica, CM3050-S).  
683 Sagittal sections (40µm) were collected on microscope slides for on-slide staining. Each slide had  
684 two positive controls (APP animals 18 months old) and at least one brain section from the  
685 remaining experimental groups (young APP, adult APP, young nTG, adult nTG). The same  
686 combinations of brain sections were used for both MEC and hippocampal staining. Sections that  
687 were too damaged were discarded. All slides were processed at the same time using the purified  
688 mouse monoclonal anti-beta-amyloid 1-16 antibody (6E10) (Biolegend, 803001) at 1/500 for 30  
689 minutes, along with the M.O.M.® Fluorescein Kit (Vector Laboratories, FMK-2201). Slides were  
690 mounted with DAPI containing Fluoromount-G (SouthernBiotech, 0100-20).

691 ***Analysis of Immunofluorescence***

692 Images for each section were acquired within the same session at 10x magnification with the same  
693 exposure settings (FITC: 250 ms, DAPI: 50 ms) on a slide scanner (Olympus, VS120) within one  
694 week of the immunofluorescence assay. The images were digitally processed using ImageJ<sup>47</sup>. ROIs  
695 were manually drawn for both MEC and the hippocampus and clear visually identifiable artifacts  
696 were removed from ROIs. Rolling ball background subtraction (70 $\mu$ m radius) was applied to every  
697 image. ROI areas were measured, and fluorescence intensity was extracted. A threshold was set  
698 for analysis to capture the plaque fluorescence signal (6000 a.u.), based on beta amyloid plaques  
699 observed in positive control animals. Using RStudio (RStudio Team 2016), the sections were  
700 grouped by structure: MEC or hippocampus. For each animal, the normalized fluorescence was  
701 calculated as the total fluorescence divided by the total area.

702 ***Immunoautoradiographic labelling of synaptic markers***

703 Immunoautoradiography experiments were performed on fresh frozen mouse brain sections  
704 (10 $\mu$ m) as described previously<sup>58,59</sup>. Brain slices were taken at the level of the MEC (bregma 2.76  
705 to 3.90) and the hippocampus (bregma -1.0 to -2.0). Slices were incubated overnight at 4° with  
706 rabbit polyclonal antiserum specific of VGLUT1 (dilution 1:10,000), VGLUT3 (dilution 1:20,000,  
707 Synaptic Systems, catalog number 135203, Göttingen Germany), VGAT (dilution 1:10,000,  
708 Synaptic Systems, catalog number 131002, Göttingen Germany), VACHT (dilution 1:10,000,  
709 Synaptic Systems, catalog number 139103, Göttingen Germany), NR1 (dilution 1:10,000,  
710 Synaptic Systems, catalog number 114103, Göttingen Germany) and then with anti-rabbit [125I]-  
711 IgG (PerkinElmer) for 2hr at 4°. Sections were then washed in PBS, rapidly rinsed in water, dried,  
712 and exposed to x-ray films (Biomax MR, Kodak) for 5 days. Standard radioactive microscapes  
713 were exposed to each film to ensure that labeling densities were in the linear range. Densitometry

714 measurements were performed with MCID analysis software on sections for each region per mouse  
715 (4 mice per experimental group for a total of 16 mice).

716 VGLUT1, VGLUT3, VACH and VGAT are vesicular transporters that mediate neurotransmission  
717 from the presynaptic side. VGLUT1 is necessary for the vesicular accumulation of glutamate and  
718 is a general marker for glutamatergic drive in synapses. In the context of grid cells, excitatory drive  
719 is a prerequisite for grid cell generation<sup>28</sup>. VGLUT3 is a specific marker for synapses made by  
720 CCK-positive basket cells in the MEC. VACHT expression in the MEC marks presynaptic  
721 cholinergic terminals from the medial septum. The severe loss of cholinergic neurons is a hallmark  
722 of Alzheimer's disease and a possible role of acetylcholine for grid cell activity has previously  
723 been reported. VGAT mediates vesicular accumulation of GABA and is a general marker for  
724 inhibitory drive which is important for grid cell generation<sup>32,33</sup>. In the case of NR1, it is a subunit  
725 of NMDA receptors that has previously been shown to be necessary for both the generation of grid  
726 cells and path integration ability<sup>35</sup>.

727

728

729

730

731

732

733

734

735

736



## References

1. Ferreira, S. T., Lourenco, M. V., Oliveira, M. M. & De Felice, F. G. Soluble amyloid-beta oligomers as synaptotoxins leading to cognitive impairment in Alzheimer's disease. *Front. Cell. Neurosci.* **9**, 191 (2015).
2. Alifragis, P. & Marsh, J. Synaptic dysfunction in Alzheimer's disease: the effects of amyloid beta on synaptic vesicle dynamics as a novel target for therapeutic intervention. *Neural Regen. Res.* **13**, 616 (2018).
3. Howett, D. *et al.* Differentiation of mild cognitive impairment using an entorhinal cortex-based test of virtual reality navigation. *Brain* **142**, 1751–1766 (2019).
4. Coughlan, G., Laczó, J., Hort, J., Minihane, A.-M. & Hornberger, M. Spatial navigation deficits - overlooked cognitive marker for preclinical Alzheimer disease? *Nat. Rev. Neurol.* **14**, 496–506 (2018).
5. Morris, R. G., Garrud, P., Rawlins, J. N. & O'Keefe, J. Place navigation impaired in rats with hippocampal lesions. *Nature* **297**, 681–683 (1982).
6. Smith, M. L. & Milner, B. The role of the right hippocampus in the recall of spatial location. *Neuropsychologia* **19**, 781–793 (1981).
7. Steffenach, H.-A., Witter, M., Moser, M.-B. & Moser, E. I. Spatial memory in the rat requires the dorsolateral band of the entorhinal cortex. *Neuron* **45**, 301–313 (2005).
8. O'Keefe, J. & Dostrovsky, J. The hippocampus as a spatial map. Preliminary evidence from unit activity in the freely-moving rat. *Brain Res.* **34**, 171–175 (1971).
9. Hafting, T., Fyhn, M., Molden, S., Moser, M.-B. & Moser, E. I. Microstructure of a spatial map in the entorhinal cortex. *Nature* **436**, 801–806 (2005).
10. Sargolini, F. *et al.* Conjunctive representation of position, direction, and velocity in entorhinal cortex. *Science* **312**, 758–762 (2006).
11. Ekstrom, A. D. *et al.* Cellular networks underlying human spatial navigation. *Nature* **425**, 184–188 (2003).
12. Jacobs, J. *et al.* Direct recordings of grid-like neuronal activity in human spatial navigation. *Nat. Neurosci.* **16**, 1188–1190 (2013).
13. Hasselmo, M. E., Hinman, J. R., Dannenberg, H. & Stern, C. E. Models of spatial and temporal dimensions of memory. *Curr. Opin. Behav. Sci.* **17**, 27–33 (2017).
14. O'Keefe, J. & Nadel, L. *The Hippocampus as a Cognitive Map*. (Oxford University Press, 1978).
15. Samsonovich, A. & McNaughton, B. L. Path integration and cognitive mapping in a continuous attractor neural network model. *J. Neurosci.* **17**, 5900–5920 (1997).
16. Burgess, N. & O'Keefe, J. Neuronal computations underlying the firing of place cells and their role in navigation. *Hippocampus* **6**, 749–762 (1996).
17. McNaughton, B. L., Battaglia, F. P., Jensen, O., Moser, E. I. & Moser, M.-B. Path integration and the neural basis of the “cognitive map.” *Nat. Rev. Neurosci.* **7**, 663–678 (2006).
18. Mucke, L. *et al.* High-level neuronal expression of abeta 1-42 in wild-type human amyloid protein precursor transgenic mice: synaptotoxicity without plaque formation. *J. Neurosci.* **20**, 4050–4058 (2000).
19. Harris, J. A. *et al.* Transsynaptic progression of amyloid- $\beta$ -induced neuronal dysfunction within the entorhinal-hippocampal network. *Neuron* **68**, 428–441 (2010).

- 782 20. Nagahara, A. H. *et al.* Early BDNF treatment ameliorates cell loss in the entorhinal cortex  
783 of APP transgenic mice. *J. Neurosci.* **33**, 15596–15602 (2013).
- 784 21. Wright, A. L. *et al.* Neuroinflammation and neuronal loss precede A $\beta$  plaque deposition in  
785 the hAPP-J20 mouse model of Alzheimer’s disease. *PLoS One* **8**, e59586 (2013).
- 786 22. Hong, S. *et al.* Complement and microglia mediate early synapse loss in Alzheimer mouse  
787 models. *Science* **352**, 712–716 (2016).
- 788 23. Saganich, M. J. *et al.* Deficits in synaptic transmission and learning in amyloid precursor  
789 protein (APP) transgenic mice require C-terminal cleavage of APP. *J. Neurosci.* **26**,  
790 13428–13436 (2006).
- 791 24. Bjerknes, T. L., Dagslott, N. C., Moser, E. I. & Moser, M.-B. Path integration in place cells  
792 of developing rats. *Proc. Natl. Acad. Sci. U. S. A.* **115**, E1637–E1646 (2018).
- 793 25. Brandon, M. P. *et al.* Reduction of theta rhythm dissociates grid cell spatial periodicity  
794 from directional tuning. *Science* **332**, 595–599 (2011).
- 795 26. Koenig, J., Linder, A. N., Leutgeb, J. K. & Leutgeb, S. The spatial periodicity of grid cells  
796 is not sustained during reduced theta oscillations. *Science* **332**, 592–595 (2011).
- 797 27. Cacucci, F., Yi, M., Wills, T. J., Chapman, P. & O’Keefe, J. Place cell firing correlates  
798 with memory deficits and amyloid plaque burden in Tg2576 Alzheimer mouse model.  
799 *Proc. Natl. Acad. Sci. U. S. A.* **105**, 7863–7868 (2008).
- 800 28. Bonnevie, T. *et al.* Grid cells require excitatory drive from the hippocampus. *Nat.*  
801 *Neurosci.* **16**, 309–317 (2013).
- 802 29. Kropff, E., Carmichael, J. E., Moser, M.-B. & Moser, E. I. Speed cells in the medial  
803 entorhinal cortex. *Nature* **523**, 419–424 (2015).
- 804 30. Cheng, I. H. *et al.* Accelerating amyloid-beta fibrillization reduces oligomer levels and  
805 functional deficits in Alzheimer disease mouse models. *J. Biol. Chem.* **282**, 23818–23828  
806 (2007).
- 807 31. Meilandt, W. J. *et al.* Neprilysin overexpression inhibits plaque formation but fails to  
808 reduce pathogenic A $\beta$  oligomers and associated cognitive deficits in human amyloid  
809 precursor protein transgenic mice. *J. Neurosci.* **29**, 1977–1986 (2009).
- 810 32. Buetfering, C., Allen, K. & Monyer, H. Parvalbumin interneurons provide grid cell-driven  
811 recurrent inhibition in the medial entorhinal cortex. *Nat. Neurosci.* **17**, 710–718 (2014).
- 812 33. Miao, C., Cao, Q., Moser, M.-B. & Moser, E. I. Parvalbumin and somatostatin  
813 interneurons control different space-coding networks in the medial entorhinal cortex. *Cell*  
814 **171**, 507–521.e17 (2017).
- 815 34. Winter, S. S., Clark, B. J. & Taube, J. S. Spatial navigation. Disruption of the head  
816 direction cell network impairs the parahippocampal grid cell signal. *Science* **347**, 870–874  
817 (2015).
- 818 35. Gil, M. *et al.* Impaired path integration in mice with disrupted grid cell firing. *Nat.*  
819 *Neurosci.* **21**, 81–91 (2018).
- 820 36. de Wilde, M. C., Overk, C. R., Sijben, J. W. & Masliah, E. Meta-analysis of synaptic  
821 pathology in Alzheimer’s disease reveals selective molecular vesicular machinery  
822 vulnerability. *Alzheimers. Dement.* **12**, 633–644 (2016).
- 823 37. Palop, J. J. *et al.* Aberrant excitatory neuronal activity and compensatory remodeling of  
824 inhibitory hippocampal circuits in mouse models of Alzheimer’s disease. *Neuron* **55**, 697–  
825 711 (2007).
- 826 38. Coyle, J. T., Price, D. L. & DeLong, M. R. Alzheimer’s disease: a disorder of cortical  
827 cholinergic innervation. *Science* **219**, 1184–1190 (1983).

- 828 39. Whitehouse, P. J., Price, D. L., Clark, A. W., Coyle, J. T. & DeLong, M. R. Alzheimer  
829 disease: evidence for selective loss of cholinergic neurons in the nucleus basalis. *Ann.*  
830 *Neurol.* **10**, 122–126 (1981).
- 831 40. Liu, A. K. L., Chang, R. C.-C., Pearce, R. K. B. & Gentleman, S. M. Nucleus basalis of  
832 Meynert revisited: anatomy, history and differential involvement in Alzheimer’s and  
833 Parkinson’s disease. *Acta Neuropathol.* **129**, 527–540 (2015).
- 834 41. Mably, A. J., Gereke, B. J., Jones, D. T. & Colgin, L. L. Impairments in spatial  
835 representations and rhythmic coordination of place cells in the 3xTg mouse model of  
836 Alzheimer’s disease. *Hippocampus* **27**, 378–392 (2017).
- 837 42. Zhao, R., Fowler, S. W., Chiang, A. C. A., Ji, D. & Jankowsky, J. L. Impairments in  
838 experience-dependent scaling and stability of hippocampal place fields limit spatial  
839 learning in a mouse model of Alzheimer’s disease. *Hippocampus* **24**, 963–978 (2014).
- 840 43. Jun, H. *et al.* Disrupted place cell remapping and impaired grid cells in a knockin model of  
841 Alzheimer’s disease. *Neuron* **107**, 1095-1112.e6 (2020).
- 842 44. LaFerla, F. M., Green, K. N. & Oddo, S. Intracellular amyloid-beta in Alzheimer’s disease.  
843 *Nat. Rev. Neurosci.* **8**, 499–509 (2007).
- 844 45. Bayer, T. A. & Wirths, O. Intracellular accumulation of amyloid-Beta - a predictor for  
845 synaptic dysfunction and neuron loss in Alzheimer’s disease. *Front. Aging Neurosci.* **2**, 8  
846 (2010).
- 847 46. Saido, T. & Leissring, M. A. Proteolytic degradation of amyloid  $\beta$ -protein. *Cold Spring*  
848 *Harb. Perspect. Med.* **2**, a006379 (2012).
- 849 47. Leissring, M. A. & Turner, A. J. Regulation of distinct pools of amyloid  $\beta$ -protein by  
850 multiple cellular proteases. *Alzheimers. Res. Ther.* **5**, 37 (2013).
- 851 48. Khan, U. A. *et al.* Molecular drivers and cortical spread of lateral entorhinal cortex  
852 dysfunction in preclinical Alzheimer’s disease. *Nat. Neurosci.* **17**, 304–311 (2014).
- 853 49. Reilly, J. F. *et al.* Amyloid deposition in the hippocampus and entorhinal cortex:  
854 quantitative analysis of a transgenic mouse model. *Proc. Natl. Acad. Sci. U. S. A.* **100**,  
855 4837–4842 (2003).
- 856 50. Xu, W., Fitzgerald, S., Nixon, R. A., Levy, E. & Wilson, D. A. Early hyperactivity in  
857 lateral entorhinal cortex is associated with elevated levels of A $\beta$ PP metabolites in the  
858 Tg2576 mouse model of Alzheimer’s disease. *Exp. Neurol.* **264**, 82–91 (2015).
- 859 51. Fu, H. *et al.* Tau pathology induces excitatory neuron loss, grid cell dysfunction, and  
860 spatial memory deficits reminiscent of early Alzheimer’s disease. *Neuron* **93**, 533-541.e5  
861 (2017).
- 862 52. Archetti, D. *et al.* Multi-study validation of data-driven disease progression models to  
863 characterize evolution of biomarkers in Alzheimer’s disease. *NeuroImage Clin.* **24**, 101954  
864 (2019).
- 865 53. Young, A. L. *et al.* A data-driven model of biomarker changes in sporadic Alzheimer’s  
866 disease. *Brain* **137**, 2564–2577 (2014).
- 867 54. Doeller, C. F., Barry, C. & Burgess, N. Evidence for grid cells in a human memory  
868 network. *Nature* **463**, 657–661 (2010).
- 869 55. Kunz, L. *et al.* Reduced grid-cell-like representations in adults at genetic risk for  
870 Alzheimer’s disease. *Science* **350**, 430–433 (2015).
- 871 56. Bierbrauer, A. *et al.* Unmasking selective path integration deficits in Alzheimer’s disease  
872 risk carriers. *Sci. Adv.* **6**, eaba1394 (2020).

- 873 57. Mathis, A. *et al.* DeepLabCut: markerless pose estimation of user-defined body parts with  
874 deep learning. *Nat. Neurosci.* **21**, 1281–1289 (2018).  
875 58. Amilhon, B. *et al.* VGLUT3 (vesicular glutamate transporter type 3) contribution to the  
876 regulation of serotonergic transmission and anxiety. *J. Neurosci.* **30**, 2198–2210 (2010).  
877 59. Vigneault, É. *et al.* Distribution of vesicular glutamate transporters in the human brain.  
878 *Front. Neuroanat.* **9**, 23 (2015).  
879

### 880 **Acknowledgments**

881 We graciously thank S. Kim, Z. Ante, K. Harandian, Q. He, A. Ismailova, D. Patel, A. Zhen and  
882 A. Milette-Gagnon for technical assistance. We also thank J. Poirer, M. Hasselmo, J. Hinman, S.  
883 Villeneuve, S. Williams, R. Rozeske, J. Lee, J. Robinson and E. Vachon-Presseau for comments  
884 on earlier versions of this manuscript and to all members of the Brandon laboratory for helpful  
885 discussions.  
886

### 887 **Author contributions**

888 J.Y. contributed to experimental design, recordings, analysis of data, and wrote the manuscript.  
889 R.L. contributed to immunohistochemistry quantifications. A.T.K contributed to analysis of data.  
890 E.V. and S.E.M contributed to immunoautoradiographic quantifications. M.P.B contributed to  
891 experimental design, analysis of data, and wrote the manuscript.  
892

### 893 **Competing interests**

894 Authors declare no competing interests.  
895

### 896 **Materials & Correspondence**

897 Correspondence to Mark P. Brandon.  
898

### 899 **Data availability**

900 Source data for all experiments are publicly available at [insert Dryad link] or via request to the  
901 corresponding author.  
902

### 903 **Code availability**

904 All custom codes written for reported analyses are publicly available at [insert GitHub link] or  
905 via request to the corresponding author.  
906  
907  
908

909 **Table 1. Summary of MEC cell yield within subject.**

| <b>Animal ID#</b> | <b>Genotype</b> | <b>Sex</b> | <b>Age Group</b> | <b># recording sessions</b> | <b># total cells</b> | <b># total cells MEC</b> | <b># grid cells</b> | <b># HD cells</b> | <b># spatial cells</b> |
|-------------------|-----------------|------------|------------------|-----------------------------|----------------------|--------------------------|---------------------|-------------------|------------------------|
| 12015             | nTG             | F          | A                | 5                           | 21                   | 18                       | 0                   | 7                 | 0                      |
| 12040             | APP             | M          | A                | 11                          | 35                   | 35                       | 1                   | 5                 | 1                      |
| 12375             | nTG             | F          | Y                | 21                          | 114                  | 114                      | 1                   | 35                | 14                     |
| 12378             | nTG             | F          | Y                | 9                           | 28                   | 28                       | 1                   | 12                | 0                      |

|       |     |   |      |    |     |     |    |    |    |
|-------|-----|---|------|----|-----|-----|----|----|----|
| 12644 | nTG | F | A    | 7  | 32  | 0   | 0  | 0  | 0  |
| 12646 | APP | F | A    | 2  | 3   | 3   | 1  | 3  | 0  |
| 12655 | nTG | F | A    | 5  | 15  | 4   | 0  | 2  | 0  |
| 12656 | nTG | F | A    | 8  | 36  | 0   | 0  | 0  | 0  |
| 12746 | nTG | F | A    | 10 | 36  | 36  | 2  | 20 | 3  |
| 12748 | nTG | F | A    | 33 | 97  | 97  | 16 | 25 | 7  |
| 12756 | nTG | F | A    | 10 | 36  | 8   | 0  | 3  | 4  |
| 12757 | nTG | F | A    | 18 | 64  | 55  | 0  | 20 | 4  |
| 12758 | APP | F | A    | 24 | 112 | 40  | 1  | 17 | 0  |
| 12759 | APP | F | A    | 23 | 70  | 70  | 0  | 30 | 3  |
| 12784 | APP | M | A    | 18 | 81  | 81  | 1  | 26 | 7  |
| 12785 | APP | M | A    | 22 | 32  | 32  | 2  | 11 | 2  |
| 12786 | nTG | M | A    | 18 | 60  | 60  | 1  | 9  | 7  |
| 12787 | nTG | M | A    | 24 | 153 | 91  | 1  | 13 | 9  |
| 12788 | APP | M | A    | 7  | 9   | 7   | 0  | 4  | 0  |
| 12790 | APP | M | A    | 18 | 79  | 79  | 2  | 27 | 2  |
| 12791 | nTG | M | A    | 38 | 192 | 192 | 1  | 49 | 17 |
| 12792 | APP | M | A    | 14 | 31  | 31  | 1  | 11 | 1  |
| 12794 | nTG | M | A    | 14 | 29  | 29  | 0  | 7  | 1  |
| 13530 | APP | F | Y    | 10 | 29  | 5   | 0  | 3  | 0  |
| 13532 | APP | F | Y    | 28 | 117 | 117 | 4  | 38 | 10 |
| 13534 | APP | F | Y    | 30 | 142 | 142 | 27 | 21 | 31 |
| 13601 | nTG | F | Y    | 18 | 67  | 7   | 0  | 0  | 0  |
| 13630 | nTG | M | Y, A | 33 | 260 | 260 | 79 | 45 | 29 |
| 13631 | nTG | M | Y    | 16 | 95  | 95  | 0  | 38 | 6  |
| 13683 | APP | F | A    | 12 | 64  | 64  | 1  | 17 | 3  |
| 13781 | nTG | M | A    | 16 | 46  | 16  | 5  | 4  | 2  |
| 13782 | nTG | M | A    | 26 | 168 | 168 | 31 | 54 | 20 |
| 13783 | nTG | M | A    | 23 | 104 | 104 | 7  | 20 | 6  |
| 13784 | nTG | M | A    | 14 | 65  | 11  | 1  | 2  | 1  |
| 13791 | APP | F | A    | 14 | 43  | 43  | 0  | 5  | 0  |
| 13792 | APP | F | A    | 13 | 40  | 40  | 0  | 5  | 2  |
| 13794 | APP | F | Y    | 17 | 63  | 63  | 0  | 24 | 7  |
| 13795 | APP | M | Y    | 21 | 91  | 64  | 0  | 15 | 3  |
| 13798 | nTG | M | Y    | 19 | 106 | 106 | 7  | 16 | 10 |
| 13799 | APP | M | Y    | 25 | 86  | 86  | 31 | 13 | 3  |
| 13827 | nTG | M | Y    | 17 | 84  | 84  | 0  | 36 | 5  |
| 13828 | APP | M | A    | 19 | 52  | 52  | 8  | 17 | 2  |
| 13884 | nTG | F | Y, A | 22 | 57  | 29  | 1  | 12 | 2  |

|       |     |   |      |    |     |     |    |     |    |
|-------|-----|---|------|----|-----|-----|----|-----|----|
| 13885 | nTG | F | Y, A | 25 | 87  | 87  | 6  | 23  | 7  |
| 13894 | APP | F | A    | 17 | 86  | 86  | 2  | 12  | 14 |
| 13895 | nTG | F | Y    | 18 | 63  | 63  | 1  | 17  | 0  |
| 13927 | APP | F | A    | 23 | 97  | 97  | 0  | 44  | 2  |
| 13928 | nTG | F | Y    | 10 | 20  | 20  | 0  | 10  | 0  |
| 13931 | APP | F | A    | 16 | 53  | 53  | 1  | 12  | 10 |
| 14012 | APP | F | A    | 13 | 40  | 40  | 0  | 18  | 0  |
| 14014 | APP | M | A    | 15 | 62  | 62  | 1  | 12  | 1  |
| 14015 | APP | M | A    | 15 | 80  | 80  | 0  | 30  | 4  |
| 14020 | APP | F | A    | 12 | 47  | 47  | 0  | 20  | 3  |
| 14117 | APP | F | A    | 12 | 29  | 29  | 0  | 9   | 2  |
| 14118 | APP | F | A    | 12 | 34  | 34  | 6  | 3   | 4  |
| 14125 | APP | M | A    | 15 | 59  | 59  | 12 | 10  | 1  |
| 14574 | APP | F | A    | 22 | 71  | 71  | 0  | 10  | 6  |
| 14593 | APP | F | A    | 20 | 63  | 63  | 6  | 21  | 7  |
| 14598 | APP | M | A    | 14 | 57  | 36  | 0  | 20  | 0  |
| 14599 | APP | M | A    | 25 | 68  | 68  | 2  | 9   | 8  |
| 14623 | APP | M | A    | 25 | 94  | 63  | 1  | 9   | 28 |
| 14754 | APP | M | Y, A | 30 | 175 | 139 | 1  | 31  | 5  |
| 14756 | APP | M | Y, A | 30 | 267 | 267 | 3  | 127 | 26 |
| 14757 | APP | M | Y, A | 34 | 168 | 164 | 8  | 43  | 7  |
| 14847 | nTG | F | Y, A | 21 | 63  | 63  | 0  | 25  | 1  |
| 14849 | nTG | M | Y, A | 20 | 95  | 52  | 1  | 16  | 1  |
| 15035 | APP | F | Y, A | 30 | 188 | 188 | 2  | 45  | 22 |
| 15036 | nTG | F | Y    | 25 | 108 | 64  | 1  | 19  | 10 |

910

**Table 2. Summary of MEC cell yield within group.**

| Group | # total cells | # grid cells | # HD cells | #spatial cells |
|-------|---------------|--------------|------------|----------------|
| APP-y | 1032          | 74           | 306        | 106            |
| nTG-y | 998           | 64           | 295        | 82             |
| APP-a | 1665          | 50           | 471        | 119            |
| nTG-a | 964           | 99           | 244        | 83             |

911

**Table 3. Summary of CA1 cell yield within subject.**

| Animal ID# | Genotype | Sex | # recording sessions | # total cells | # place cells |
|------------|----------|-----|----------------------|---------------|---------------|
| 16129      | APP      | F   | 17                   | 58            | 28            |
| 16130      | nTG      | F   | 15                   | 74            | 58            |
| 16132      | nTG      | M   | 14                   | 60            | 27            |
| 16133      | APP      | M   | 14                   | 102           | 76            |
| 16135      | nTG      | M   | 24                   | 137           | 79            |
| 16153      | nTG      | F   | 2                    | 9             | 4             |

|       |     |   |    |     |    |
|-------|-----|---|----|-----|----|
| 16154 | APP | F | 17 | 138 | 45 |
| 17624 | APP | F | 22 | 53  | 18 |
| 17625 | nTG | F | 18 | 87  | 37 |
| 17627 | APP | F | 19 | 115 | 51 |
| 17628 | nTG | F | 18 | 74  | 49 |
| 17903 | APP | M | 8  | 85  | 33 |

912 **Table 4. Summary of CA1 cell yield within group.**

| Group | # total cells | # place cells |
|-------|---------------|---------------|
| APP-a | 551           | 251           |
| nTG-a | 441           | 254           |

913 **Table 5. Sample sizes of all statistical comparisons between groups in the main figures.**

| Figure        | nTG-y | nTG-a | J20-y | J20-a |
|---------------|-------|-------|-------|-------|
| 1a-e          | 64    | 99    | 74    | 50    |
| 2a            | 295   | 244   | 306   | 471   |
| 2b            | 82    | 83    | 106   | 119   |
| 2c            | n/a   | 118   | n/a   | 109   |
| 2e            | 273   | 302   | 253   | 492   |
| 3a            | 64    | 98    | 74    | 50    |
| 3d – grid     | 61    | 95    | 73    | 49    |
| 3d – nongrid  | 82    | 83    | 106   | 119   |
| 3d - place    | n/a   | 114   | n/a   | 96    |
| 3e            | 61    | 95    | 73    | 49    |
| 4c – grid/int | 60    | 115   | 34    | 54    |
| 4c – grid/HD  | 73    | 110   | 34    | 30    |
| 5d            | 377   | 307   | 500   | 301   |

914

915

916

917

918

919

920

921

922

923

924

## Figure Legend:

925

**Fig. 1.** Reduction of grid cell spatial periodicity in adult APP transgenic mice. **a**, Firing rate maps for grid cells from each experimental group. Each row includes 15 grid cells with the highest grid scores sorted in descending order. The spatial peak firing rate and grid score are indicated in the rate map's top-left and top-right, respectively. Non-transgenic young mice (nTG-y); non-transgenic adult mice (nTG-a); APP young mice (APP-y); APP adult mice (APP-a). **b**, Cumulative distribution function (CDF) compares the distribution of grid scores between experimental groups. Inset bar graph displays the median and 3rd interquartile range (solid error bars). Y-axis of inset bar graph indicates the grid score. (nTG-y vs. nTG-a:  $p = 0.12$ , nTG-y vs. APP-y:  $p = 0.73$ , APP-y vs. APP-a:  $p = 0.0000001$ , nTG-a vs. APP-a:  $p = 0.0000025$ ). **c**, Scatter plot displays grid score by age recorded (in days). A two-way ANOVA was conducted to examine the effects of age and genotype on grid score. There was a significant interaction between the effects of age and genotype:  $F(1, 280) = 11.99$ ,  $p = 0.00062$ . **d**, Color-coded rotational correlations are shown, sorted in descending order of the grid score value. All neurons within the top 20% of grid scores are shown. The max grid score in each experimental group is displayed at the top of the respective plot. **e**, Same as (**b**), but panels compare spatial information, spatial peak firing rate, and mean firing rate between groups. Inset bar graphs display the median and 3rd interquartile range (solid error bars). (Spatial information: nTG-y vs. nTG-a:  $p = 0.77$ , nTG-y vs. APP-y:  $p = 0.34$ , APP-y vs. APP-a:  $p = 0.0000065$ , nTG-a vs. APP-a:  $p = 0.0012$ ; Spatial peak firing rate: nTG-y vs. nTG-a:  $p = 0.59$ , nTG-y vs. APP-y:  $p = 0.79$ , APP-y vs. APP-a:  $p = 0.77$ , nTG-a vs. APP-a:  $p = 0.27$ ; Mean firing rate: nTG-y vs. nTG-a:  $p = 0.99$ , nTG-y vs. APP-y:  $p = 0.086$ , APP-y vs. APP-a:  $p = 0.13$ , nTG-a vs. APP-a:  $p = 0.79$ ). Y-axes of all inset bar graphs indicate the value of the metric being compared by the corresponding CDF plot. \*\* =  $p < 0.01$ , \*\*\* =  $p < 0.001$ , corrected for multiple comparisons.

948

949

**Fig. 2.** Medial entorhinal head direction cells, non-grid spatially-tuned cells, CA1 place cells, and medial entorhinal theta oscillations in adult APP mice. **a**, (Top) Polar plots of eight head-direction cells for each group. Directional peak firing rate and mean resultant length (MRL) are indicated in the top-left and top-right, respectively. (Bottom) CDF plots compare MRL, directional peak firing rate, and mean firing rate of all head direction cells between experimental groups. Inset bar graphs display the median and 3rd interquartile range (solid error bars). Y-axes of all inset bar graphs

954



955 indicate the value of the metric being compared by the corresponding CDF plot. (MRL: nTG-y vs.  
956 nTG-a:  $p = 0.051$ , nTG-y vs. APP-y:  $p = 0.45$ , APP-y vs. APP-a:  $p = 0.41$ , nTG-a vs. APP-a:  $p =$   
957  $0.11$ ; Spatial peak firing rate: nTG-y vs. nTG-a:  $p = 0.44$ , nTG-y vs. APP-y:  $p = 0.21$ , APP-y vs.  
958 APP-a:  $p = 0.96$ , nTG-a vs. APP-a:  $p = 0.073$ ; Mean firing rate: nTG-y vs. nTG-a:  $p = 0.18$ , nTG-  
959 y vs. APP-y:  $p = 0.28$ , APP-y vs. APP-a:  $p = 0.87$ , nTG-a vs. APP-a:  $p = 0.08$ ). **b**, (Top) Rate maps  
960 of eight non-grid spatially-tuned cells for each group. Spatial peak firing rate and split-half  
961 reliability scores are indicated in the top-left and top-right, respectively. (Bottom) Same as **(a)**, but  
962 panels compare the average firing field size, spatial peak firing rate, and mean firing rate across  
963 groups. (Firing field size: nTG-y vs. nTG-a:  $p = 0.40$ , nTG-y vs. APP-y:  $p = 0.66$ , APP-y vs. APP-  
964 a:  $p = 0.64$ , nTG-a vs. APP-a:  $p = 0.37$ ; Spatial peak firing rate: nTG-y vs. nTG-a:  $p = 0.028$ , nTG-  
965 y vs. APP-y:  $p = 0.49$ , APP-y vs. APP-a:  $p = 0.73$ , nTG-a vs. APP-a:  $p = 0.032$ ; Mean firing rate:  
966 nTG-y vs. nTG-a:  $p = 0.76$ , nTG-y vs. APP-y:  $p = 0.37$ , APP-y vs. APP-a:  $p = 0.50$ , nTG-a vs.  
967 APP-a:  $p = 0.93$ ). **c**, (Top) Rate maps of eight CA1 place cells in nTG and APP adult mice.  
968 (Bottom) Same as **(a)**, but panels compare spatial information, spatial peak firing rate, and mean  
969 firing rate between adult nTG and adult APP mice. (Spatial information: nTG-a vs. APP-a:  $p =$   
970  $0.08$ ; Spatial peak firing rate: nTG-a vs. APP-a:  $p = 0.32$ ; Mean firing rate: nTG-a vs. APP-a:  $p =$   
971  $0.31$ ). **d**, Comparison of spatial information and mean firing rates of CA1 place cells in adult nTG  
972 and APP mice when varying the cell selection criteria of peak spatial firing rate. The central mark  
973 of each bar is the median value of the metric being compared, the edges of each bar represent the  
974 25th and 75th percentiles, and the solid lines extend to the most extreme values not considered  
975 outliers. The colored dots indicate the number of place cells that passed the selection threshold. **e**,  
976 (Left) Spectrograms compare the MEC theta frequency and power as a function of the animal's  
977 running speed. (Right) MEC theta power and frequency are independently displayed as a function  
978 of the animal's running speed. \* =  $p < 0.05$ .

979

980 **Fig. 3.** Grid cells in adult APP mice are spatially unstable. **a**, CDF plot compares the normalized  
981 firing field size of grid cells between groups. Inset bar graph displays the median and 3rd  
982 interquartile range (solid error bars). Y-axis of inset bar graph indicates the normalized firing field  
983 size. (nTG-y vs. nTG-a:  $p = 0.076$ , nTG-y vs. APP-y:  $p = 0.76$ , APP-y vs. APP-a:  $p = 0.52$ , nTG-  
984 a vs. APP-a:  $p = 0.0025$ ). **b**, Each grid cell recording was split into 10 three minute partitions. Two  
985 dimensional spatial cross-correlations were computed across all partition pairs. Example cross-

986 correlations of the first partition to subsequent partitions in two grid cells recorded from a nTG  
987 and an APP mouse are shown to the right. **c**, (Left) Schematic shows that two dimensional spatial  
988 displacement was calculated as the distance between the peak correlation pixel and the center pixel  
989 of the cross-correlation. (Right) Two dimensional displacement of grid cells, non-grid spatially-  
990 tuned cells and place cells as a function of lags between partitions. Dots indicate mean values and  
991 arrow bars indicate standard error of mean. **d**, CDF plots compare the mean two dimensional  
992 displacement of grid cells, non-grid spatially-tuned cells and place cells between groups. Inset bar  
993 graphs display the median and 3rd interquartile range (solid error bars). Y-axes of all inset bar  
994 graphs indicate the mean two dimensional displacement. (Grid cells: nTG-y vs. nTG-a:  $p = 0.76$ ,  
995 nTG-y vs. APP-y:  $p = 0.76$ , APP-y vs. APP-a:  $p = 0.00091$ , nTG-a vs. APP-a:  $p = 0.00034$ ;  
996 Nongrid spatial cells: nTG-y vs. nTG-a:  $p = 0.74$ , nTG-y vs. APP-y:  $p = 0.24$ , APP-y vs. APP-a:  
997  $p = 0.19$ , nTG-a vs. APP-a:  $p = 0.87$ ; Place cells: nTG-a vs. APP-a:  $p = 0.37$ ). **e**, CDF plot compares  
998 the mean two dimensional rotational displacement of one grid cell partition relative to another in  
999 the cross-correlation between groups. Inset bar graph displays the median and 3rd interquartile  
1000 range (solid error bars). Y-axis of inset bar graph indicates the mean two dimensional rotational  
1001 displacement. (nTG-y vs. nTG-a:  $p = 0.15$ , nTG-y vs. APP-y:  $p = 0.87$ , APP-y vs. APP-a:  $p = 0.73$ ,  
1002 nTG-a vs. APP-a:  $p = 0.15$ ). \*\*\* =  $p < 0.001$ , corrected for multiple comparisons.

1003  
1004 **Fig. 4.** Reduced spike-time synchrony in grid cell-interneuron and grid cell-head direction cell  
1005 pairs. **a**, Spike-time cross-correlations between grid cell-interneuron pairs (left) and grid cell-head  
1006 direction cell pairs (right) for all experimental groups (rows). Each panel displays the normalized  
1007 correlation (by median) by time lag (in ms). Black curves indicate median values and gray contours  
1008 indicate median absolute deviation. Lighter gray columns indicate the 25 ms time window in each  
1009 lag direction from 0 ms. **b**, Color-coded raster plots show the magnitude of co-activity within a  
1010 400 ms time window. Y-axes are sorted in descending order by cell-pairs with the maximum co-  
1011 activity within a 25 ms time window, and numbers indicate the number of cell-pairs in each  
1012 experimental group. **c**, Cumulative distribution functions (CDFs) compare the mean co-activity  
1013 within a 25 ms time window between experimental groups for different cell-pair types. Inset bar  
1014 graphs display the median and 3rd interquartile range (solid error bars). Y-axes of inset bar graphs  
1015 indicate the mean co-activity within a 25 ms time window. (Grid-Interneuron: nTG-y vs. nTG-a:  
1016  $p = 0.30$ , nTG-y vs. APP-y:  $p = 0.13$ , APP-y vs. APP-a:  $p = 0.51$ , nTG-a vs. APP-a:  $p = 0.0018$ ;

1017 Grid-HD: nTG-y vs. nTG-a:  $p = 0.33$ , nTG-y vs. APP-y:  $p = 0.56$ , APP-y vs. APP-a:  $p = 0.078$ ,  
1018 nTG-a vs. APP-a:  $p = 0.038$ ). \* =  $p < 0.05$ , \*\*\* =  $p < 0.001$ . # =  $p = 0.078$ , corrected for multiple  
1019 comparisons.

1020

1021 **Fig. 5.** Path integration is impaired in APP mice and worsens across age. **a**, Schematic of food-  
1022 foraging task in total darkness. Mice left their refuge to forage for a randomly placed food pellet.  
1023 Upon discovery, they navigated back to the refuge prior to consumption. **b**, (Left) The probability  
1024 of reaching the refuge at the initial wall encounter is depicted in a polar plot. (Right) Probability  
1025 density plot compares the likelihood of arriving at each of the ten walls between groups. W1 and  
1026 W10 refer to the ten walls in consecutive order. **c**, Polar plots compare the probability of reaching  
1027 the refuge at the initial wall encounter between groups. Probability values are indicated below  
1028 polar plots for each group. **d**, CDF plots compare the initial wall angle, the initial heading angle,  
1029 the normalized distance travelled and the proportion of the return path spent along the periphery  
1030 between groups. Inset bar graphs display the median and 3rd interquartile range (solid error bars).  
1031 Y-axes of all inset bar graphs indicate the value of the metric being compared by the corresponding  
1032 CDF plot. The calculation of each metric is shown in schematics above their respective plots.  
1033 (Initial wall angle: nTG-y vs. nTG-a:  $p = 0.50$ , nTG-y vs. APP-y:  $p = 6.3e-15$ , APP-y vs. APP-a:  
1034  $p = 0.11$ , nTG-a vs. APP-a:  $p = 5.6e-15$ ; Initial heading angle: nTG-y vs. nTG-a:  $p = 0.22$ , nTG-  
1035 y vs. APP-y:  $p = 3.1e-10$ , APP-y vs. APP-a:  $p = 1.9e-5$ , nTG-a vs. APP-a:  $p = 9.5e-17$ ; Normalized  
1036 distance travelled: nTG-y vs. nTG-a:  $p = 0.0083$ , nTG-y vs. APP-y:  $p = 1.2e-6$ , APP-y vs. APP-a:  
1037  $p = 1.2e-6$ , nTG-a vs. APP-a:  $p = 3.9e-11$ ; Proportion of path along walls: nTG-y vs. nTG-a:  $p =$   
1038  $0.74$ , nTG-y vs. APP-y:  $p = 0.011$ , APP-y vs. APP-a:  $p = 7.1e-5$ , nTG-a vs. APP-a:  $p = 1.6e-7$ ). \*\*  
1039 =  $p < 0.01$ , \*\*\* =  $p < 0.001$ , corrected for multiple comparisons. **e**, Bar graphs compare the relative  
1040 percent increase of the initial wall angle, the initial heading angle, the normalized distance travelled  
1041 and the proportion of the return path spent along the periphery between groups. Each bar consists  
1042 of adult group values that were normalized against the mean value of their young genotype-  
1043 matched counterparts. Bars indicate the mean and error bars indicate standard error of means.  
1044 (Initial wall angle:  $p = 0.031$ ; Initial heading angle:  $p = 0.00011$ ; Normalized distance travelled:  $p =$   
1045  $0.031$ ; Proportion of path along walls:  $p = 0.00032$ ). \* =  $p < 0.05$ , \*\*\* =  $p < 0.001$ .

1046

1047

1048

## Figure 1 - Ying

1049

**a**

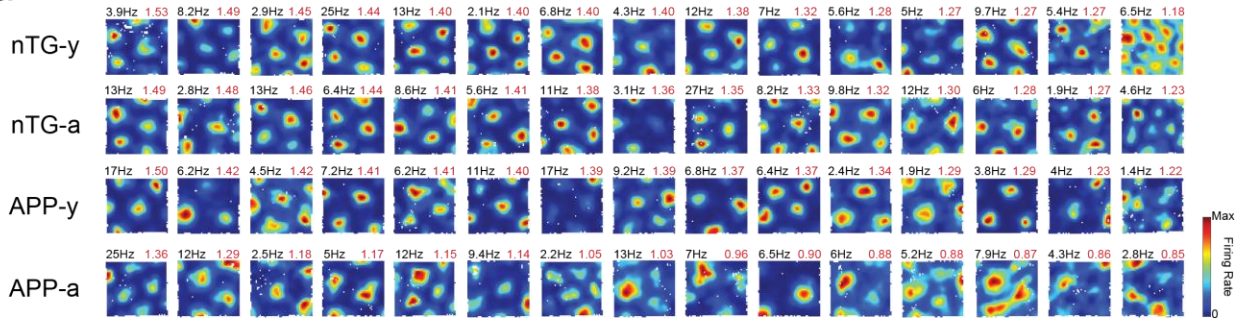

1050

1051

1052

1053

**b**

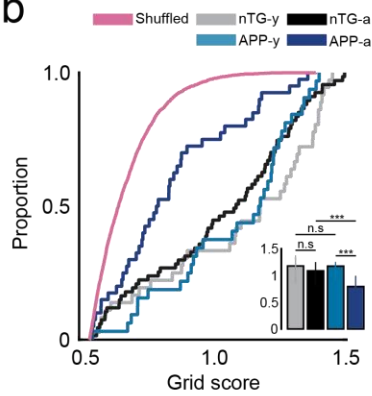

1054

1055

1056

1057

**c**

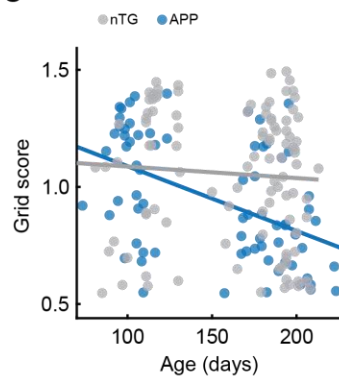

1058

**e**

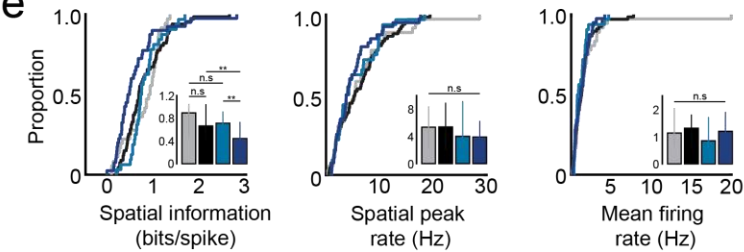

1059

1060

1061

**Fig. 1.** Reduction of grid cell spatial periodicity in adult APP transgenic mice. **a**, Firing rate maps for grid cells from each experimental group. Each row includes 15 grid cells with the highest grid scores sorted in descending order. The spatial peak firing rate and grid score are indicated in the rate map's top-left and top-right, respectively. Non-transgenic young mice (nTG-y); non-transgenic adult mice (nTG-a); APP young mice (APP-y); APP adult mice (APP-a). **b**, Cumulative distribution function (CDF) compares the distribution of grid scores between experimental groups. Inset bar graph displays the median and 3rd interquartile range (solid error bars). Y-axis of inset bar graph indicates the grid score. (nTG-y vs. nTG-a:  $p = 0.12$ , nTG-y vs. APP-y:  $p = 0.73$ , APP-y vs. APP-a:  $p = 0.0000001$ , nTG-a vs. APP-a:  $p = 0.0000025$ ). **c**, Scatter plot displays grid score by age recorded (in days). A two-way ANOVA was conducted to examine the effects of age and genotype on grid score. There was a significant interaction between the effects of age and genotype:  $F(1, 280) = 11.99$ ,  $p = 0.00062$ . **d**, Color-coded rotational correlations are shown, sorted in descending order of the grid score value. All neurons within the top 20% of grid scores are shown. The max grid score in each experimental group is displayed at the top of the respective plot. **e**, Same as (b), but panels compare spatial information, spatial peak firing rate, and mean firing rate between groups. Inset bar graphs display the median and 3rd interquartile range (solid error bars). (Spatial information: nTG-y vs. nTG-a:  $p = 0.77$ , nTG-y vs. APP-y:  $p = 0.34$ , APP-y vs. APP-a:  $p = 0.0000065$ , nTG-a vs. APP-a:  $p = 0.0012$ ; Spatial peak firing rate: nTG-y vs. nTG-a:  $p = 0.59$ , nTG-y vs. APP-y:  $p = 0.79$ , APP-y vs. APP-a:  $p = 0.77$ , nTG-a vs. APP-a:  $p = 0.27$ ; Mean firing rate: nTG-y vs. nTG-a:  $p = 0.99$ , nTG-y vs. APP-y:  $p = 0.086$ , APP-y vs. APP-a:  $p = 0.13$ , nTG-a vs. APP-a:  $p = 0.79$ ). Y-axes of all inset bar graphs indicate the value of the metric being compared by the corresponding CDF plot. \*\* =  $p < 0.01$ , \*\*\* =  $p < 0.001$ , corrected for multiple comparisons.

1062

1063

1064

1065

1066

1067

1068

## Figure 2 - Ying

1069

1070

1071

1072

1073

1074

1075

1076

1077

1078

1079

1080

1081

1082

1083

1084

1085

1086

1087

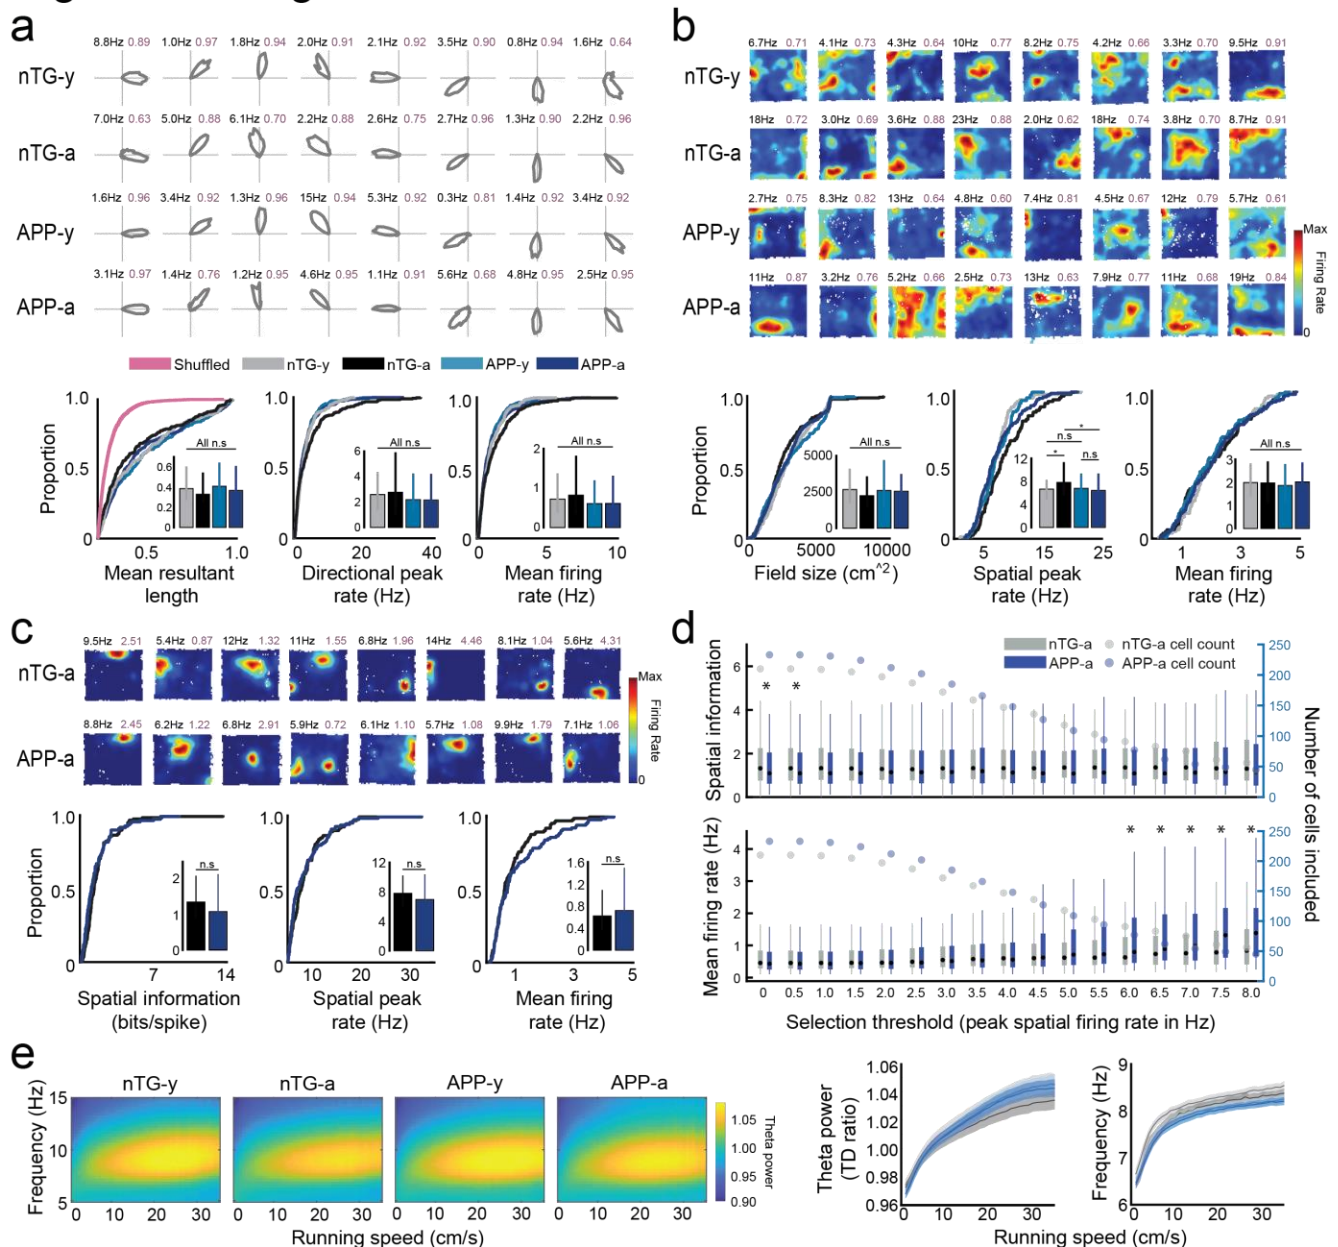

**Fig. 2.** Medial entorhinal head direction cells, non-grid spatially-tuned cells, CA1 place cells, and medial entorhinal theta oscillations in adult APP mice. **a**, (Top) Polar plots of eight head-direction cells for each group. Directional peak firing rate and mean resultant length (MRL) are indicated in the top-left and top-right, respectively. (Bottom) CDF plots compare MRL, directional peak firing rate, and mean firing rate of all head direction cells between experimental groups. Inset bar graphs display the median and 3rd interquartile range (solid error bars). Y-axes of all inset bar graphs indicate the value of the metric being compared by the corresponding CDF plot. (MRL: nTG-y vs. nTG-a:  $p = 0.051$ , nTG-y vs. APP-y:  $p = 0.45$ , APP-y vs. APP-a:  $p = 0.11$ ; Spatial peak firing rate: nTG-y vs. nTG-a:  $p = 0.44$ , nTG-y vs. APP-y:  $p = 0.21$ , APP-y vs. APP-a:  $p = 0.96$ , nTG-a vs. APP-a:  $p = 0.073$ ; Mean firing rate: nTG-y vs. nTG-a:  $p = 0.18$ , nTG-y vs. APP-y:  $p = 0.28$ , APP-y vs. APP-a:  $p = 0.87$ , nTG-a vs. APP-a:  $p = 0.08$ ). **b**, (Top) Rate maps of eight non-grid spatially-tuned cells for each group. Spatial peak firing rate and split-half reliability scores are indicated in the top-left and top-right, respectively. (Bottom) Same as **a**, but panels compare the average firing field size, spatial peak firing rate, and mean firing rate across groups. (Firing field size: nTG-y vs. nTG-a:  $p = 0.40$ , nTG-y vs. APP-y:  $p = 0.66$ , APP-y vs. APP-a:  $p = 0.64$ , nTG-a vs. APP-a:  $p = 0.37$ ; Spatial peak firing rate: nTG-y vs. nTG-a:  $p = 0.028$ , nTG-y vs. APP-y:  $p = 0.49$ , APP-y vs. APP-a:  $p = 0.73$ , nTG-a vs. APP-a:  $p = 0.032$ ; Mean firing rate: nTG-y vs. nTG-a:  $p = 0.76$ , nTG-y vs. APP-y:  $p = 0.37$ , APP-y vs. APP-a:  $p = 0.50$ , nTG-a vs. APP-a:  $p = 0.93$ ). **c**, (Top) Rate maps of eight CA1 place cells in nTG and APP adult mice. (Bottom) Same as **a**, but panels compare spatial information, spatial peak firing rate, and mean firing rate between adult nTG and adult APP mice. (Spatial information: nTG-a vs. APP-a:  $p = 0.08$ ; Spatial peak firing rate: nTG-a vs. APP-a:  $p = 0.32$ ; Mean firing rate: nTG-a vs. APP-a:  $p = 0.31$ ). **d**, Comparison of spatial information and mean firing rates of CA1 place cells in adult nTG and APP mice when varying the cell selection criteria of peak spatial firing rate. The central mark of each bar is the median value of the metric being compared, the edges of each bar represent the 25th and 75th percentiles, and the solid lines extend to the most extreme values not considered outliers. The colored dots indicate the number of place cells that passed the selection threshold. **e**, (Left) Spectrograms compare the MEC theta frequency and power as a function of the animal's running speed. (Right) MEC theta power and frequency are independently displayed as a function of the animal's running speed. \* =  $p < 0.05$ .

1088

## Figure 3 - Ying

1089

1090

1091

1092

1093

1094

1095

1096

1097

1098

1099

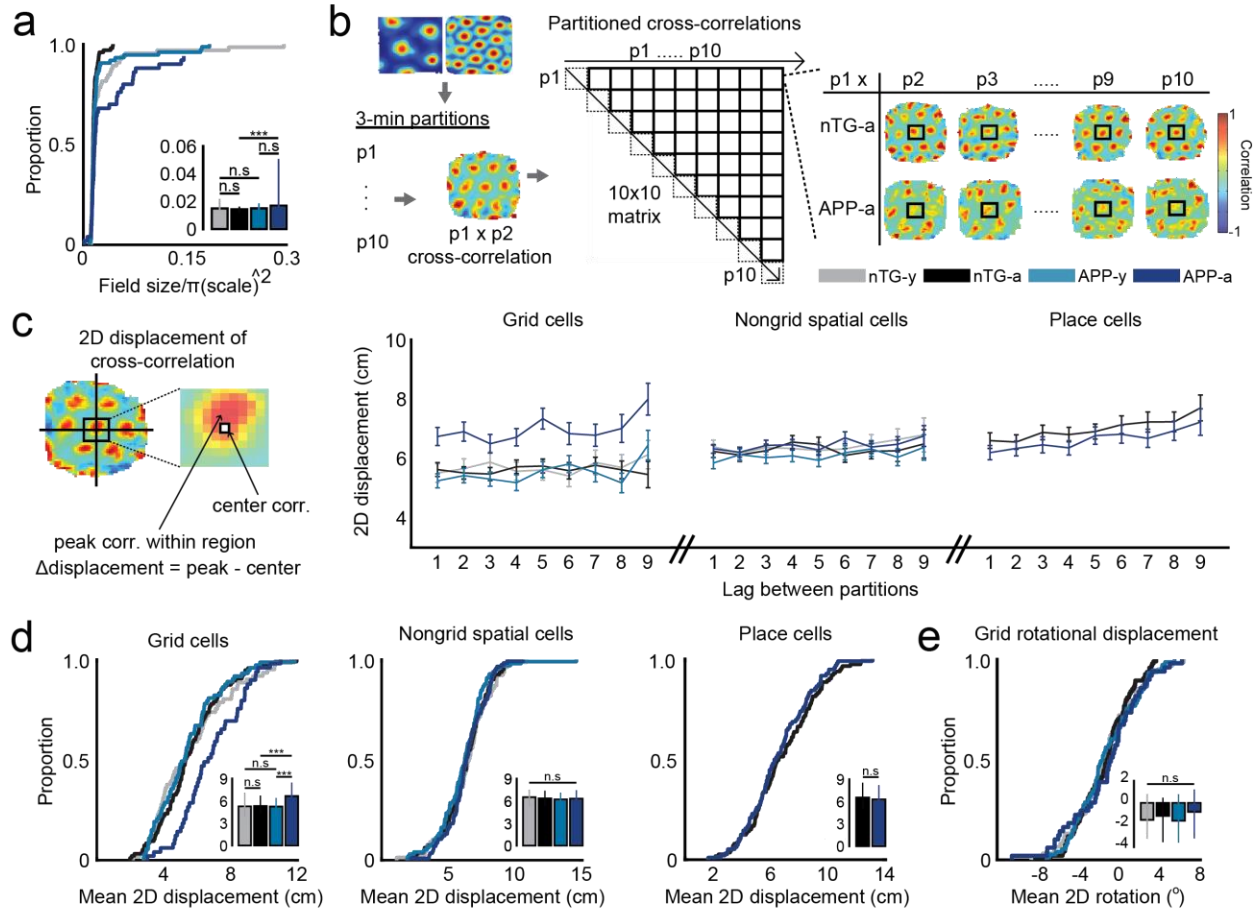

1100

1101

1102

1103

1104

1105

1106

1107

**Fig. 3.** Grid cells in adult APP mice are spatially unstable. **a**, CDF plot compares the normalized firing field size of grid cells between groups. Inset bar graph displays the median and 3rd interquartile range (solid error bars). Y-axis of inset bar graph indicates the normalized firing field size. (nTG-y vs. nTG-a:  $p = 0.076$ , nTG-y vs. APP-y:  $p = 0.76$ , APP-y vs. APP-a:  $p = 0.52$ , nTG-a vs. APP-a:  $p = 0.0025$ ). **b**, Each grid cell recording was split into 10 three minute partitions. Two dimensional spatial cross-correlations were computed across all partition pairs. Example cross-correlations of the first partition to subsequent partitions in two grid cells recorded from a nTG and an APP mouse are shown to the right. **c**, (Left) Schematic shows that two dimensional spatial displacement was calculated as the distance between the peak correlation pixel and the center pixel of the cross-correlation. (Right) Two dimensional displacement of grid cells, non-grid spatially-tuned cells and place cells as a function of lags between partitions. Dots indicate mean values and arrow bars indicate standard error of mean. **d**, CDF plots compare the mean two dimensional displacement of grid cells, non-grid spatially-tuned cells and place cells between groups. Inset bar graphs display the median and 3rd interquartile range (solid error bars). Y-axes of all inset bar graphs indicate the mean two dimensional displacement. (Grid cells: nTG-y vs. nTG-a:  $p = 0.76$ , nTG-y vs. APP-y:  $p = 0.76$ , APP-y vs. APP-a:  $p = 0.00091$ , nTG-a vs. APP-a:  $p = 0.00034$ ; Nongrid spatial cells: nTG-y vs. nTG-a:  $p = 0.74$ , nTG-y vs. APP-y:  $p = 0.24$ , APP-y vs. APP-a:  $p = 0.19$ , nTG-a vs. APP-a:  $p = 0.87$ ; Place cells: nTG-a vs. APP-a:  $p = 0.37$ ). **e**, CDF plot compares the mean two dimensional rotational displacement of one grid cell partition relative to another in the cross-correlation between groups. Inset bar graph displays the median and 3rd interquartile range (solid error bars). Y-axis of inset bar graph indicates the mean two dimensional rotational displacement. (nTG-y vs. nTG-a:  $p = 0.15$ , nTG-y vs. APP-y:  $p = 0.87$ , APP-y vs. APP-a:  $p = 0.73$ , nTG-a vs. APP-a:  $p = 0.15$ ). \*\*\* =  $p < 0.001$ , corrected for multiple comparisons.

## Figure 4 - Ying

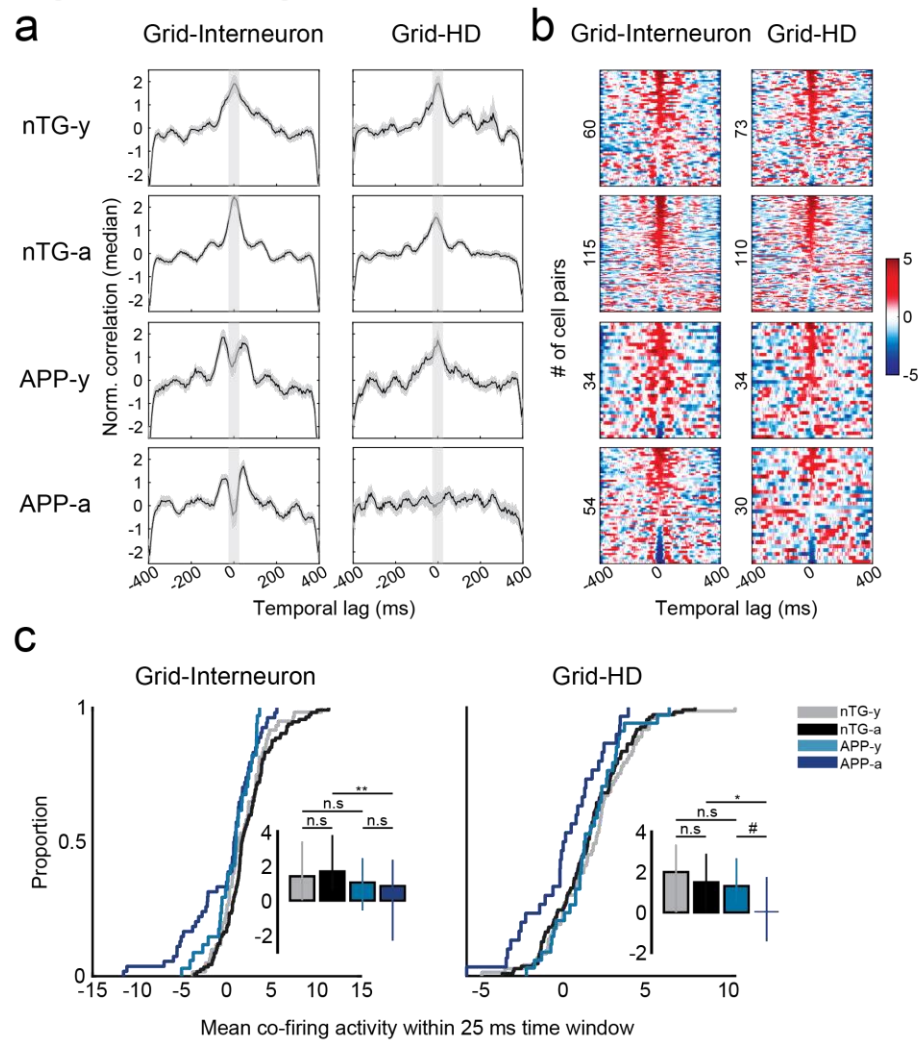

**Fig. 4.** Reduced spike-time synchrony in grid cell-interneuron and grid cell-head direction cell pairs. **a**, Spike-time cross-correlations between grid cell-interneuron pairs (left) and grid cell-head direction cell pairs (right) for all experimental groups (rows). Each panel displays the normalized correlation (by median) by time lag (in ms). Black curves indicate median values and gray contours indicate median absolute deviation. Lighter gray columns indicate the 25 ms time window in each lag direction from 0 ms. **b**, Color-coded raster plots show the magnitude of co-activity within a 400 ms time window. Y-axes are sorted in descending order by cell-pairs with the maximum co-activity within a 25 ms time window, and numbers indicate the number of cell-pairs in each experimental group. **c**, Cumulative distribution functions (CDFs) compare the mean co-activity within a 25 ms time window between experimental groups for different cell-pair types. Inset bar graphs display the median and 3rd interquartile range (solid error bars). Y-axes of inset bar graphs indicate the mean co-activity within a 25 ms time window. (Grid-Interneuron: nTG-y vs. nTG-a:  $p = 0.30$ , nTG-y vs. APP-y:  $p = 0.13$ , APP-y vs. APP-a:  $p = 0.51$ , nTG-a vs. APP-a:  $p = 0.0018$ ; Grid-HD: nTG-y vs. nTG-a:  $p = 0.33$ , nTG-y vs. APP-y:  $p = 0.56$ , APP-y vs. APP-a:  $p = 0.078$ , nTG-a vs. APP-a:  $p = 0.038$ ). \* =  $p < 0.05$ , \*\*\* =  $p < 0.001$ . # =  $p = 0.078$ , corrected for multiple comparisons.

1128

## Figure 5 - Ying

1129

1130

1131

1132

1133

1134

1135

1136

1137

1138

1139

1140

1141

1142

1143

1144

1145

1146

1147

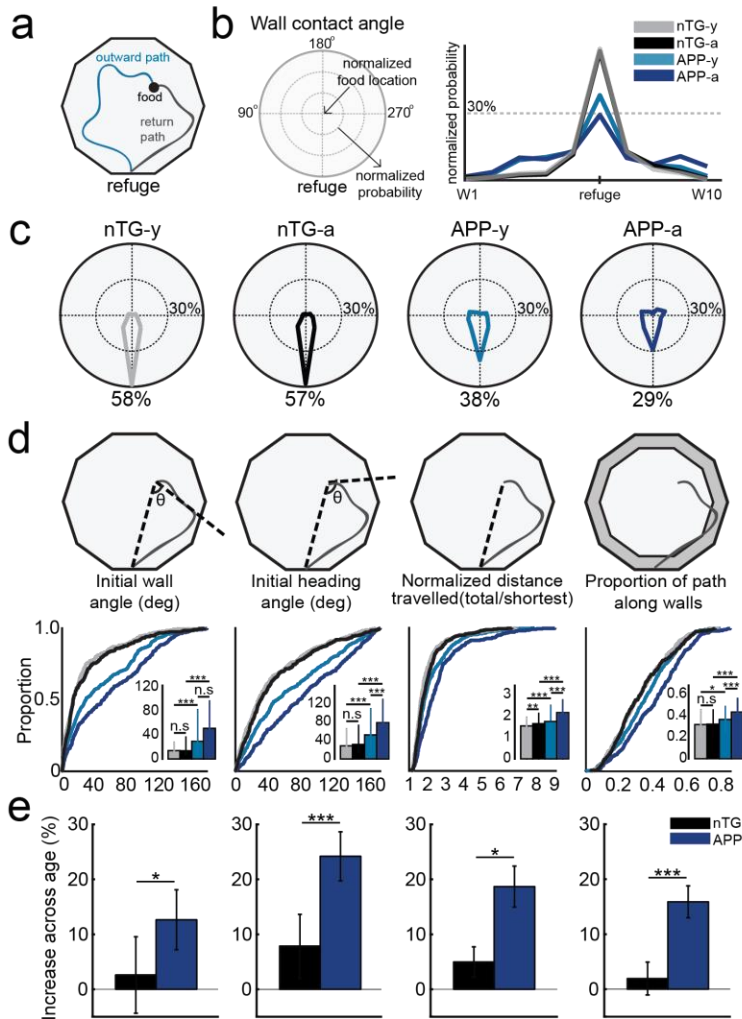

**Fig. 5.** Path integration is impaired in APP mice and worsens across age. **a**, Schematic of food-foraging task in total darkness. Mice left their refuge to forage for a randomly placed food pellet. Upon discovery, they navigated back to the refuge prior to consumption. **b**, (Left) The probability of reaching the refuge at the initial wall encounter is depicted in a polar plot. (Right) Probability density plot compares the likelihood of arriving at each of the ten walls between groups. W1 and W10 refer to the ten walls in consecutive order. **c**, Polar plots compare the probability of reaching the refuge at the initial wall encounter between groups. Probability values are indicated below polar plots for each group. **d**, CDF plots compare the initial wall angle, the initial heading angle, the normalized distance travelled and the proportion of the return path spent along the periphery between groups. Inset bar graphs display the median and 3rd interquartile range (solid error bars). Y-axes of all inset bar graphs indicate the value of the metric being compared by the corresponding CDF plot. The calculation of each metric is shown in schematics above their respective plots. (Initial wall angle: nTG-y vs. nTG-a:  $p = 0.50$ , nTG-y vs. APP-y:  $p = 6.3e-15$ , APP-y vs. APP-a:  $p = 0.11$ , nTG-a vs. APP-a:  $p = 5.6e-15$ ; Initial heading angle: nTG-y vs. nTG-a:  $p = 0.22$ , nTG-y vs. APP-y:  $p = 3.1e-10$ , APP-y vs. APP-a:  $p = 1.9e-5$ , nTG-a vs. APP-a:  $p = 9.5e-17$ ; Normalized distance travelled: nTG-y vs. nTG-a:  $p = 0.0083$ , nTG-y vs. APP-y:  $p = 1.2e-6$ , APP-y vs. APP-a:  $p = 1.2e-6$ , nTG-a vs. APP-a:  $p = 3.9e-11$ ; Proportion of path along walls: nTG-y vs. nTG-a:  $p = 0.74$ , nTG-y vs. APP-y:  $p = 0.011$ , APP-y vs. APP-a:  $p = 7.1e-5$ , nTG-a vs. APP-a:  $p = 1.6e-7$ ). \*\* =  $p < 0.01$ , \*\*\* =  $p < 0.001$ , corrected for multiple comparisons. **e**, Bar graphs compare the relative percent increase of the initial wall angle, the initial heading angle, the normalized distance travelled and the proportion of the return path spent along the periphery between groups. Each bar consists of adult group values that were normalized against the mean value of their young genotype-matched counterparts. Bars indicate the mean and error bars indicate standard error of means. (Initial wall angle:  $p = 0.031$ ; Initial heading angle:  $p = 0.00011$ ; Normalized distance travelled:  $p = 0.031$ ; Proportion of path along walls:  $p = 0.00032$ ). \* =  $p < 0.05$ , \*\*\* =  $p < 0.001$ .



1148

1149

1150

1151

1152

1153

1154

**Supplementary Figures for:**

1155

**Disruption of the grid cell network in a mouse model of early Alzheimer's**

1156

**disease**

1157

1158

1159

1160

1161

1162

1163

1164

1165

1166

1167

1168

1169

1170

1171

1172

1173

1174

1175

1176

1177

1178

## Supplementary Figure 1

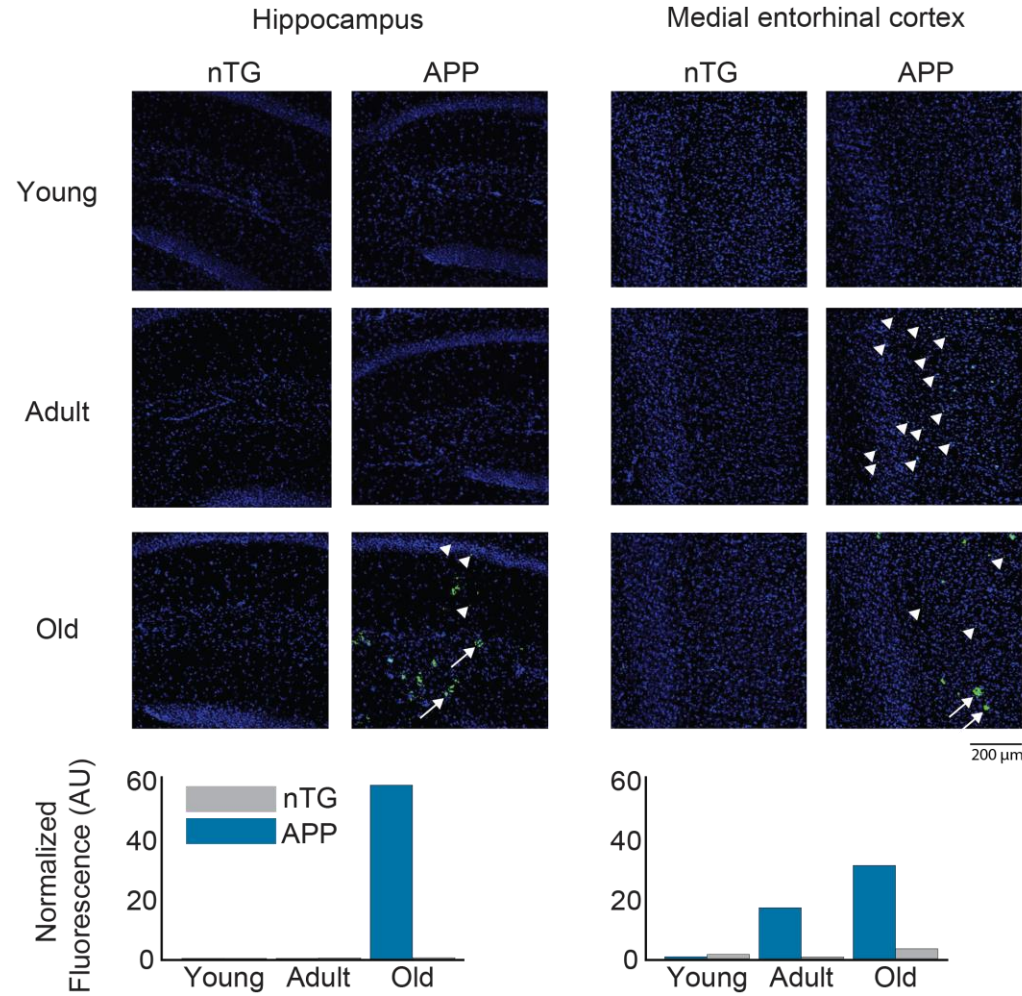

**Supplementary Figure 1.** Quantification of amyloid-beta plaques in APP mice. Representative examples of magnified brain sections of the hippocampus and medial entorhinal cortex of nTG and APP mice across 3 different age groups: young (3-4.5 mo.), adult (4.5-7 mo.) and old (18 mo.). Arrows and arrowheads indicate the presence of two different kinds of fluorescent morphologies. Adult APP mice have low levels of fluorescence in the medial entorhinal cortex, but the fluorescent signal is intracellular and does not resemble the bigger and widespread morphology observed in the hippocampus and medial entorhinal cortex of old APP mice. The fluorescence signal in adult APP mice might therefore represent early deposition of fibrillar amyloid-beta prior to the formation of mature plaques.

## Supplementary Figure 2. Page 1

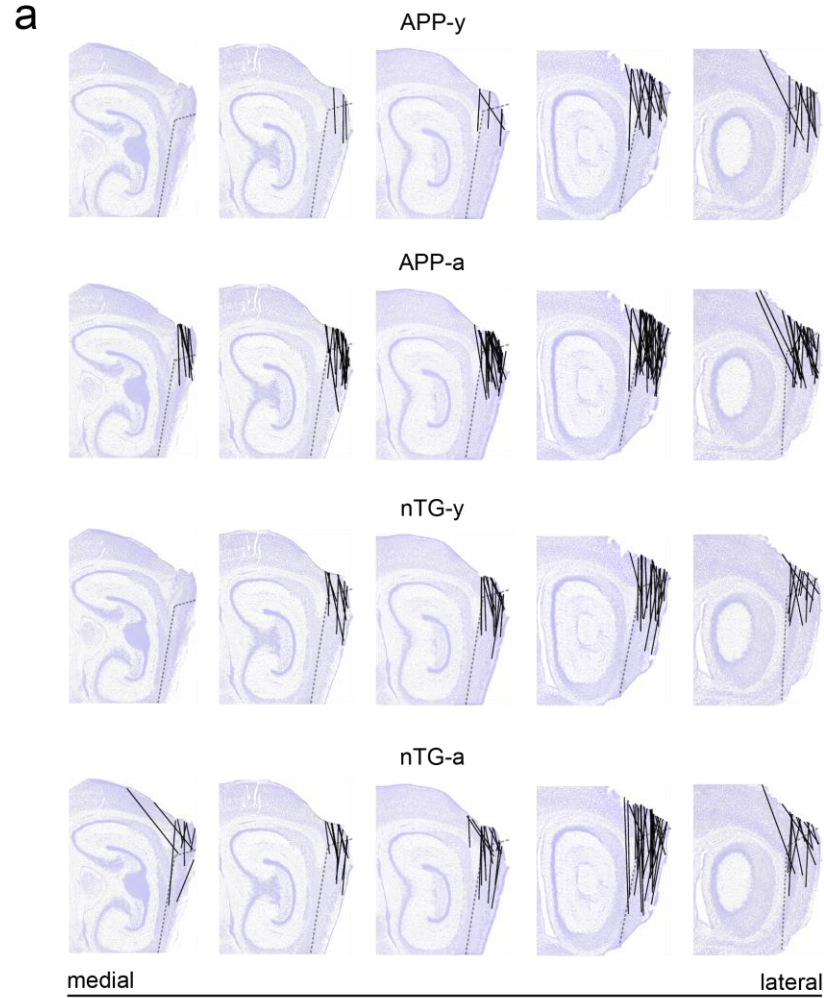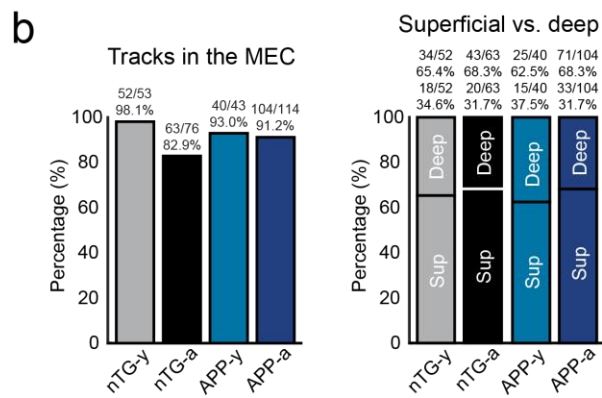

## Supplementary Figure 2. Page 2

C

nTG-y

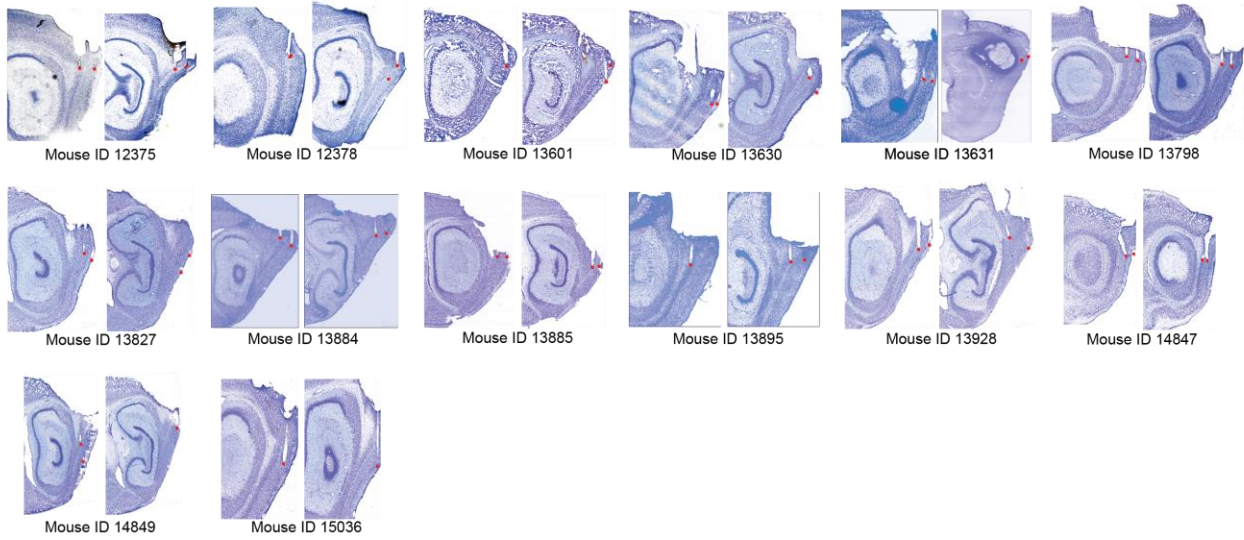

nTG-a

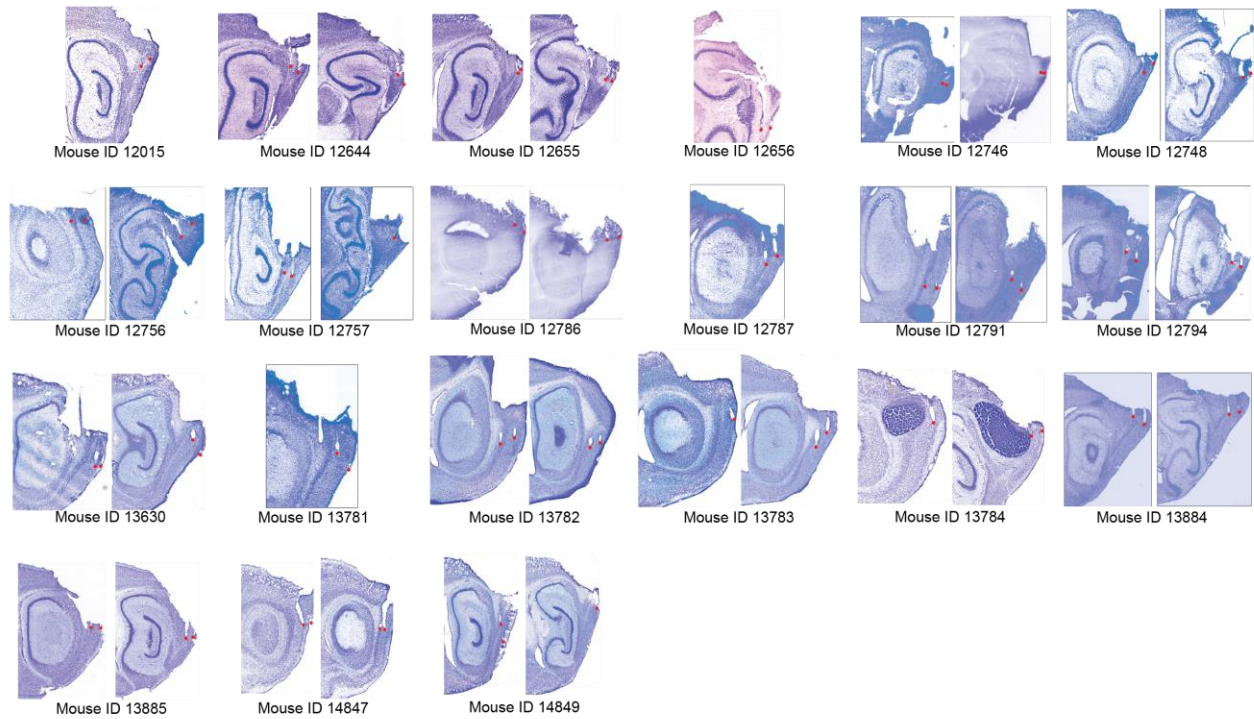

1259  
1260  
1261  
1262  
1263  
1264  
1265  
1266  
1267  
1268  
1269  
1270  
1271  
1272  
1273  
1274  
1275  
1276  
1277  
1278  
1279  
1280  
1281  
1282  
1283  
1284  
1285  
1286  
1287  
1288  
1289  
1290  
1291  
1292  
1293  
1294  
1295  
1296  
1297  
1298

## Supplementary Figure 2. Page 3

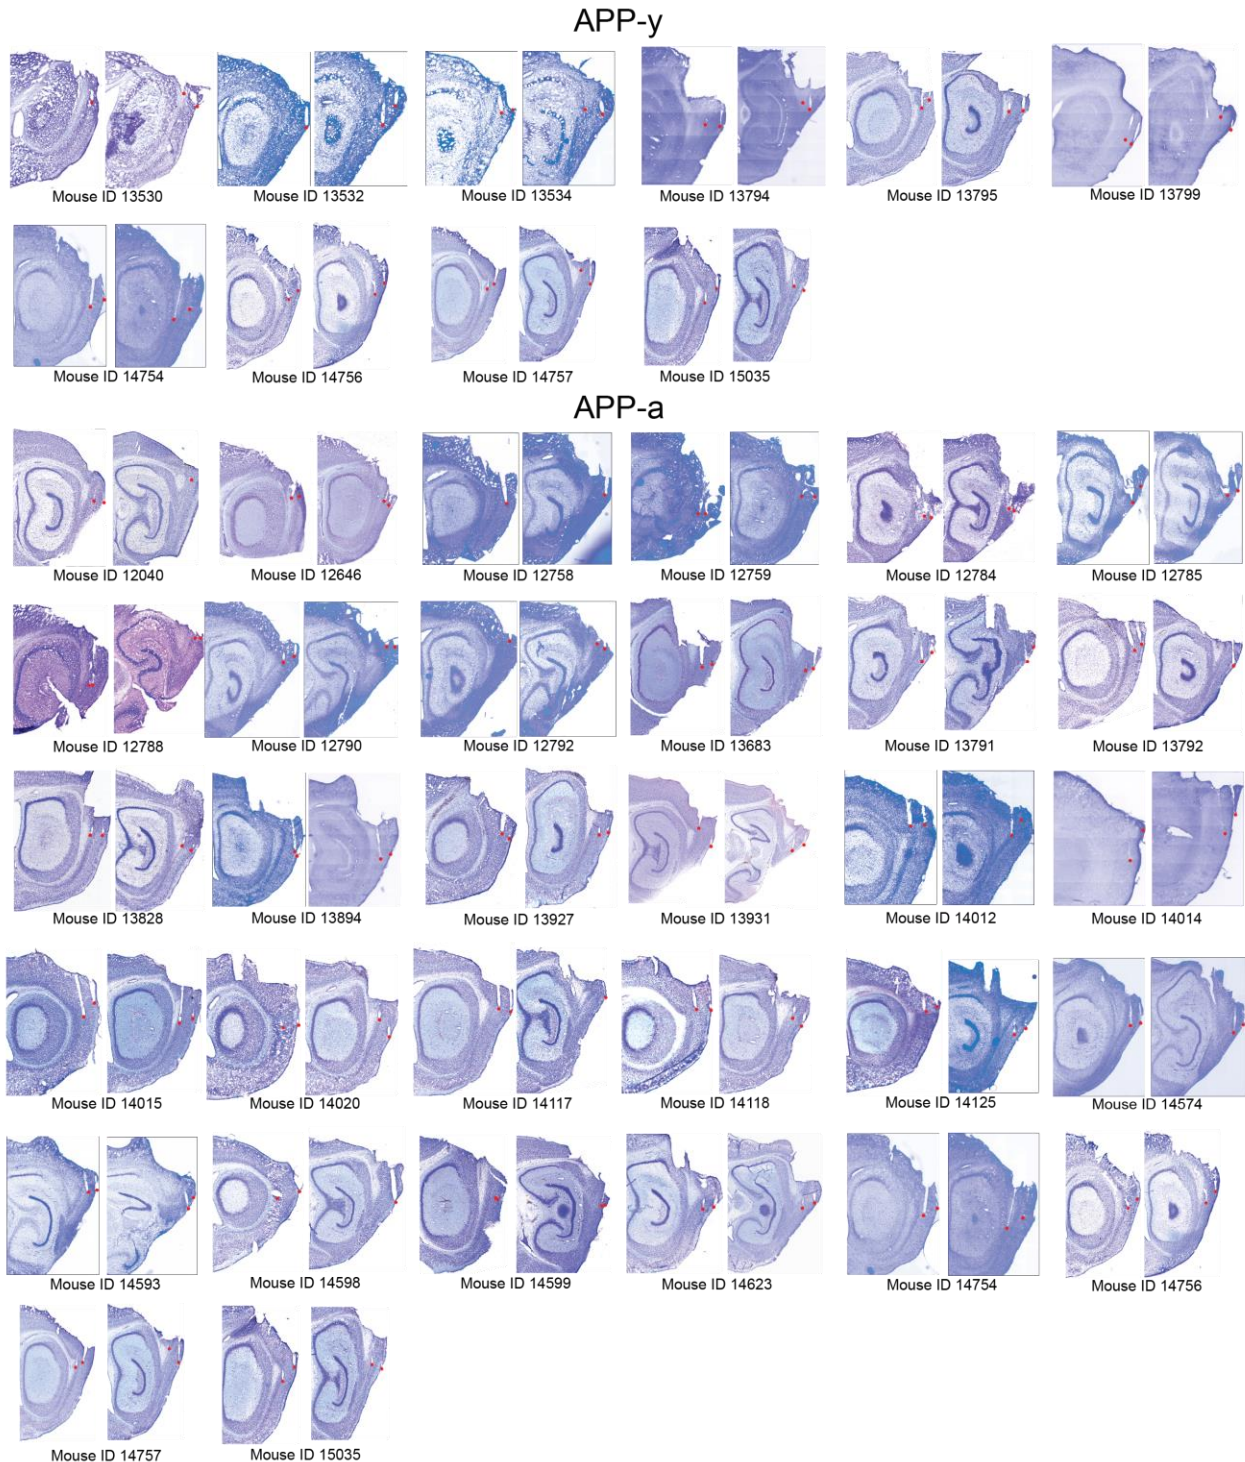

**Supplementary Figure 2.** Tetrode track histology for MEC recordings. **a**, Averaged sagittal brain sections from the most lateral part of MEC (far right) to the start of parasubiculum (far left). The individual track locations obtained from each animal were plotted along these sections by experimental group. **b**, Quantification of track locations shown in **(a)**. (Left) Comparison of the percentage of tetrode tips located in the MEC between groups. (Right) Comparison of the percentage of tetrode tip in either the superficial or deep layers of MEC between groups. **c**, Track locations of each animal ordered by genotype and age. The tips of tracks are highlighted with a red dot.

### Supplementary Figure 3

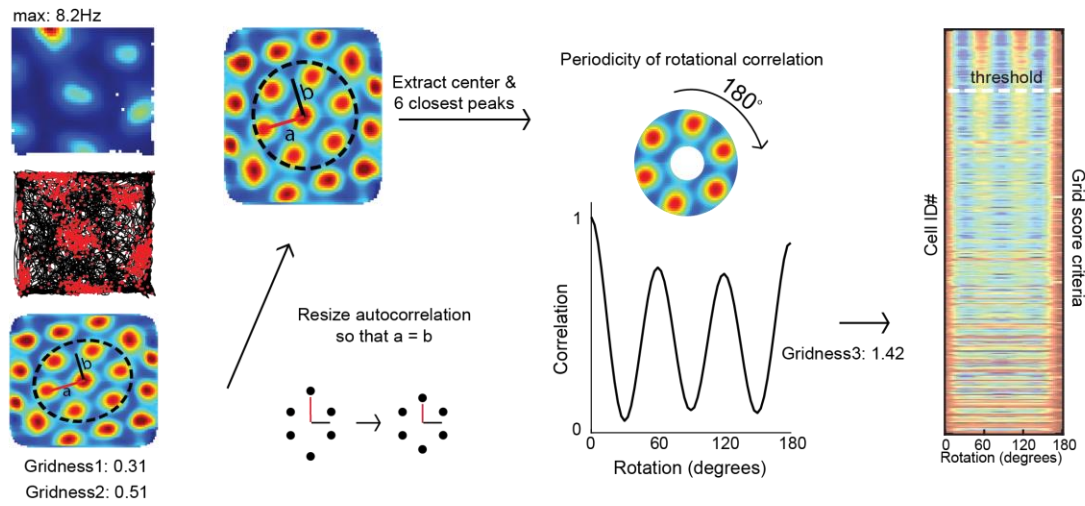

**Supplementary Figure 3.** Creation of raster plots indicating the strength of rotational correlation of each cell. Autocorrelations of grid cell rate maps were resized to ensure that the major and minor axes, a and b, were equal in length. The resulting image was then rotated 180 degrees to compute a color-coded row indicating the correlation strength at each degree of rotation. These rows were then sorted by decreasing order of grid score in a raster plot.

1339  
1340  
1341  
1342  
1343  
1344  
1345  
1346  
1347  
1348  
1349  
1350  
1351  
1352  
1353  
1354  
1355  
1356  
1357  
1358  
1359  
1360  
1361  
1362  
1363  
1364  
1365  
1366  
1367  
1368  
1369  
1370  
1371  
1372  
1373  
1374  
1375  
1376  
1377  
1378

1379  
1380  
1381  
1382  
1383  
1384  
1385  
1386  
1387  
1388  
1389  
1390  
1391  
1392  
1393  
1394  
1395  
1396  
1397  
1398  
1399  
1400  
1401  
1402  
1403  
1404  
1405  
1406  
1407  
1408  
1409  
1410  
1411  
1412  
1413  
1414  
1415  
1416  
1417  
1418

## Supplementary Figure 4

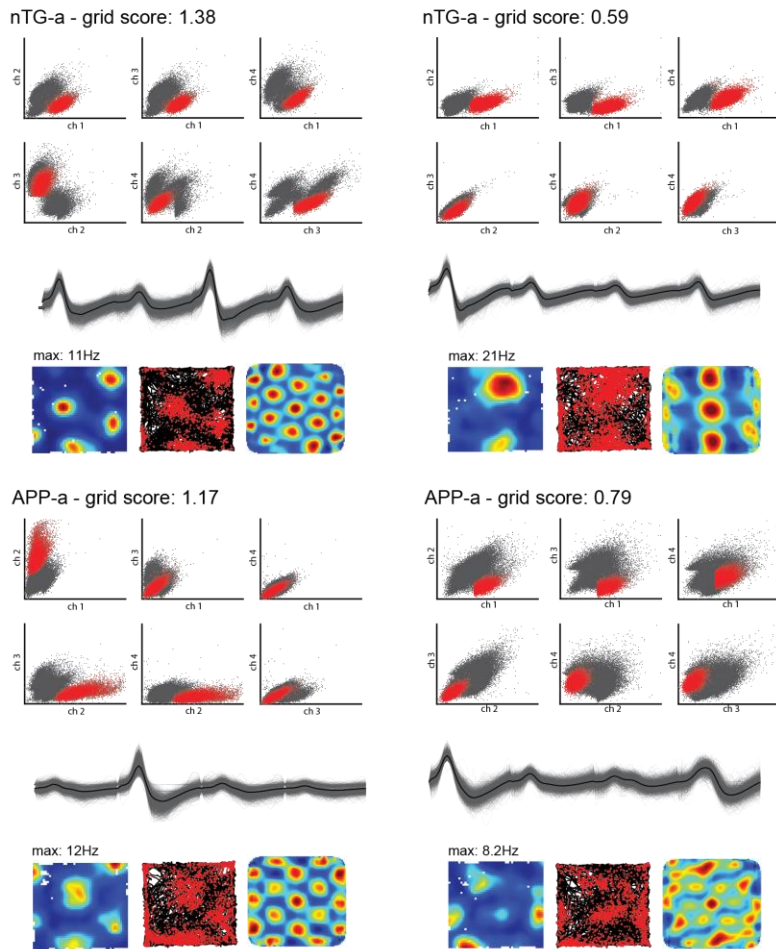

**Supplementary Figure 4.** Example of well-isolated waveforms of four grid cells recorded in nTG-a and APP-a mice. Cells with a high and low grid score were selected in each group for comparison. Each panel consists of the cell's grid score, the unit location in the six possible conformations of cluster space sorted by waveform amplitude, individual waveforms recorded across the four recording channels (grey) and the average waveform (black), the cell's rate map, trajectory map and rate map autocorrelation.

## Supplementary Figure 5

a

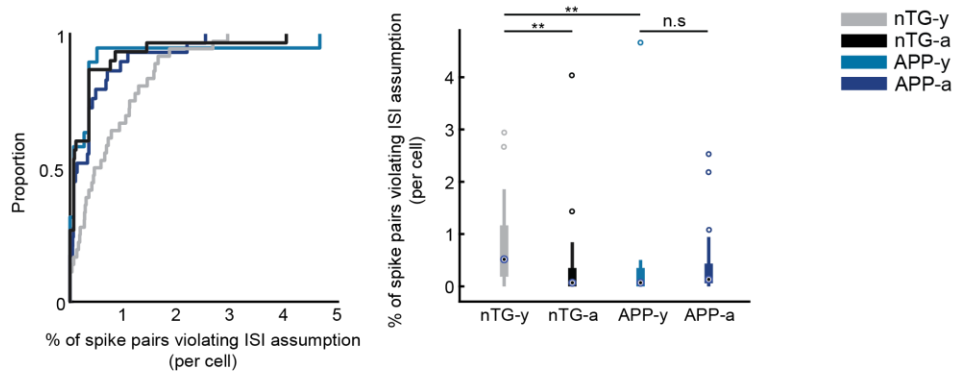

b

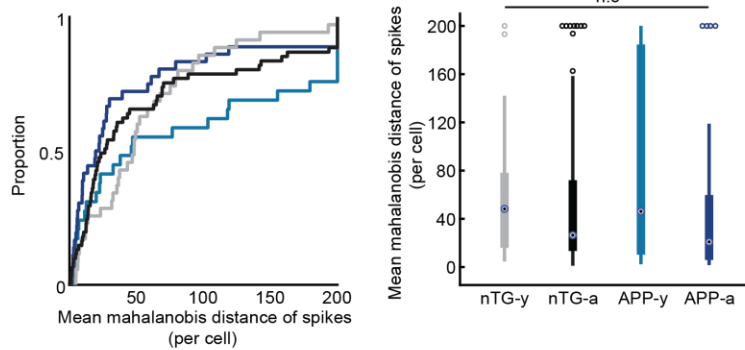

**Supplementary Figure 5.** Spike isolation quality of grid cells. **a**, (left) CDF plot compares the % of spike pairs with an interspike interval (ISI) less than 1 millisecond. These instances are considered non-physiological and may be due to faulty isolation or the presence of noisy spikes. (right) Box plot comparing the same thing as the CDF plot. The central dot of each bar is the median value, the edges of each bar represent the 25th and 75th percentiles, and the solid lines extend to the most extreme values not considered outliers. Separate dots are considered outliers. **b**, Same as (**a**), but comparing the mean mahalanobis distance of spikes per grid cell. \*\* =  $p < 0.01$ , corrected for multiple comparisons.



## Supplementary Figure 6

Two-way ANOVA: Grid cells

| Source      | Sum Square | df  | MS   | F     | p           |
|-------------|------------|-----|------|-------|-------------|
| Age         | 2.01       | 1   | 2.01 | 28.26 | = 0.0000002 |
| Genotype    | 0.37       | 1   | 0.37 | 5.15  | = 0.024     |
| Interaction | 0.86       | 1   | 0.86 | 11.99 | = 0.00062   |
| Error       | 19.96      | 280 | 0.07 |       |             |
| Total       | 22.65      | 283 |      |       |             |

Two-way ANOVA: Head-direction cells

| Source      | Sum Square | df   | MS   | F    | p       |
|-------------|------------|------|------|------|---------|
| Age         | 0.19       | 1    | 0.19 | 3.71 | = 0.054 |
| Genotype    | 0.17       | 1    | 0.17 | 3.25 | = 0.072 |
| Interaction | 0.01       | 1    | 0.01 | 0.2  | = 0.65  |
| Error       | 67.45      | 1311 | 0.05 |      |         |
| Total       | 67.77      | 1314 |      |      |         |

Two-way ANOVA: Non-grid spatial cells

| Source      | Sum Square             | df  | MS                     | F    | p      |
|-------------|------------------------|-----|------------------------|------|--------|
| Age         | 9.41 x 10 <sup>5</sup> | 1   | 9.41 x 10 <sup>5</sup> | 0.48 | = 0.49 |
| Genotype    | 9.34 x 10 <sup>5</sup> | 1   | 9.34 x 10 <sup>5</sup> | 0.47 | = 0.49 |
| Interaction | 7.35 x 10 <sup>5</sup> | 1   | 7.35 x 10 <sup>5</sup> | 0.37 | = 0.54 |
| Error       | 7.60 x 10 <sup>8</sup> | 386 | 1.97 x 10 <sup>6</sup> |      |        |
| Total       | 7.62 x 10 <sup>5</sup> | 389 |                        |      |        |

**Supplementary Figure 6.** Two-way unbalanced ANOVAs comparing the effects of age, genotype, and interaction on spatial tuning scores for grid cells (grid score), head-direction cells (mean resultant length) and non-grid spatial cells (field size cm<sup>2</sup>).

df= degrees of freedom, MS = mean square.

## Supplementary Figure 7

a

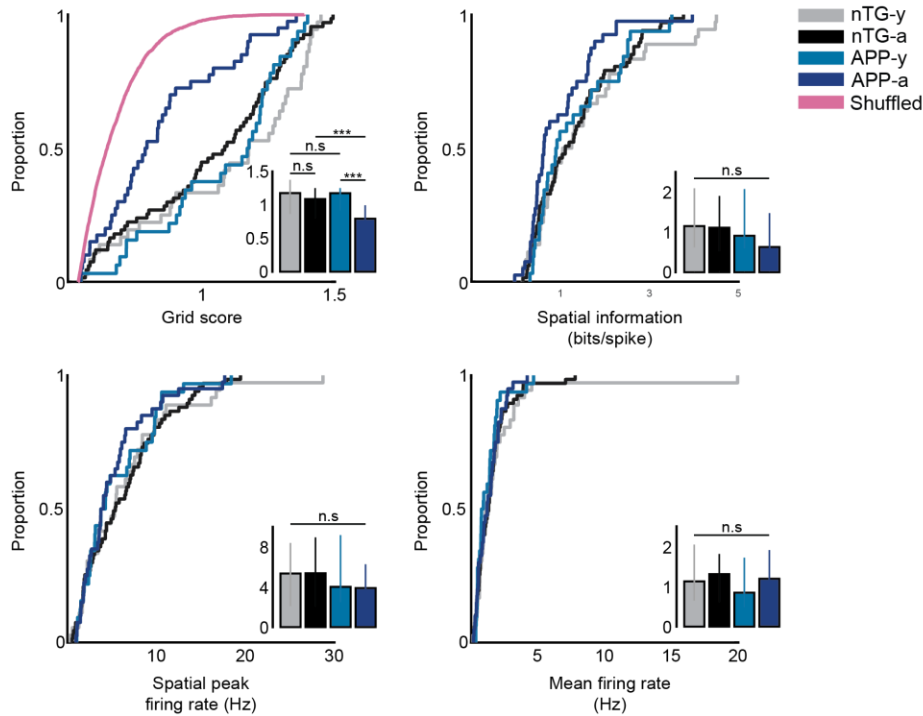

b

| Two-way ANOVA: Grid cells |            |     |      |       |           |
|---------------------------|------------|-----|------|-------|-----------|
| Source                    | Sum Square | df  | MS   | F     | p         |
| Age                       | 0.90       | 1   | 0.90 | 12.81 | = 0.00045 |
| Genotype                  | 0.44       | 1   | 0.44 | 6.31  | = 0.013   |
| Interaction               | 0.28       | 1   | 0.28 | 4.04  | = 0.046   |
| Error                     | 12.06      | 171 | 0.07 |       |           |
| Total                     | 13.62      | 174 |      |       |           |

**Supplementary Figure 7.** Grid cell spatial tuning remains impaired in adult APP mice when duplicate cell counts are removed. **a**, CDF plots compare grid score, spatial information, spatial peak firing rate, and mean firing rate of all grid cells between experimental groups. Inset bar graphs display the median and 3rd interquartile range (solid error bars). Y-axes of all inset bar graphs indicate the value of the metric being compared by the corresponding CDF plot. \*\* =  $p < 0.01$ , \*\*\* =  $p < 0.001$ , corrected for multiple comparisons. (Grid score: nTG-y vs. nTG-a:  $p = 0.19$ , nTG-y vs. APP-y:  $p = 0.44$ , APP-y vs. APP-a:  $p = 0.00041$ , nTG-a vs. APP-a:  $p = 0.0031$ ; Spatial information: nTG-y vs. nTG-a:  $p = 0.65$ , nTG-y vs. APP-y:  $p = 0.61$ , APP-y vs. APP-a:  $p = 0.14$ , nTG-a vs. APP-a:  $p = 0.14$ ; Spatial peak firing rate: nTG-y vs. nTG-a:  $p = 0.89$ , nTG-y vs. APP-y:  $p = 0.64$ , APP-y vs. APP-a:  $p = 0.73$ , nTG-a vs. APP-a:  $p = 0.22$ ; Mean firing rate: nTG-y vs. nTG-a:  $p = 0.67$ , nTG-y vs. APP-y:  $p = 0.23$ , APP-y vs. APP-a:  $p = 0.45$ , nTG-a vs. APP-a:  $p = 0.80$ ). **b**, Two-way unbalanced ANOVAs comparing the effects of age, genotype, and interaction on grid scores for grid cells. df = degrees of freedom, MS = mean square.

## Supplementary Figure 8

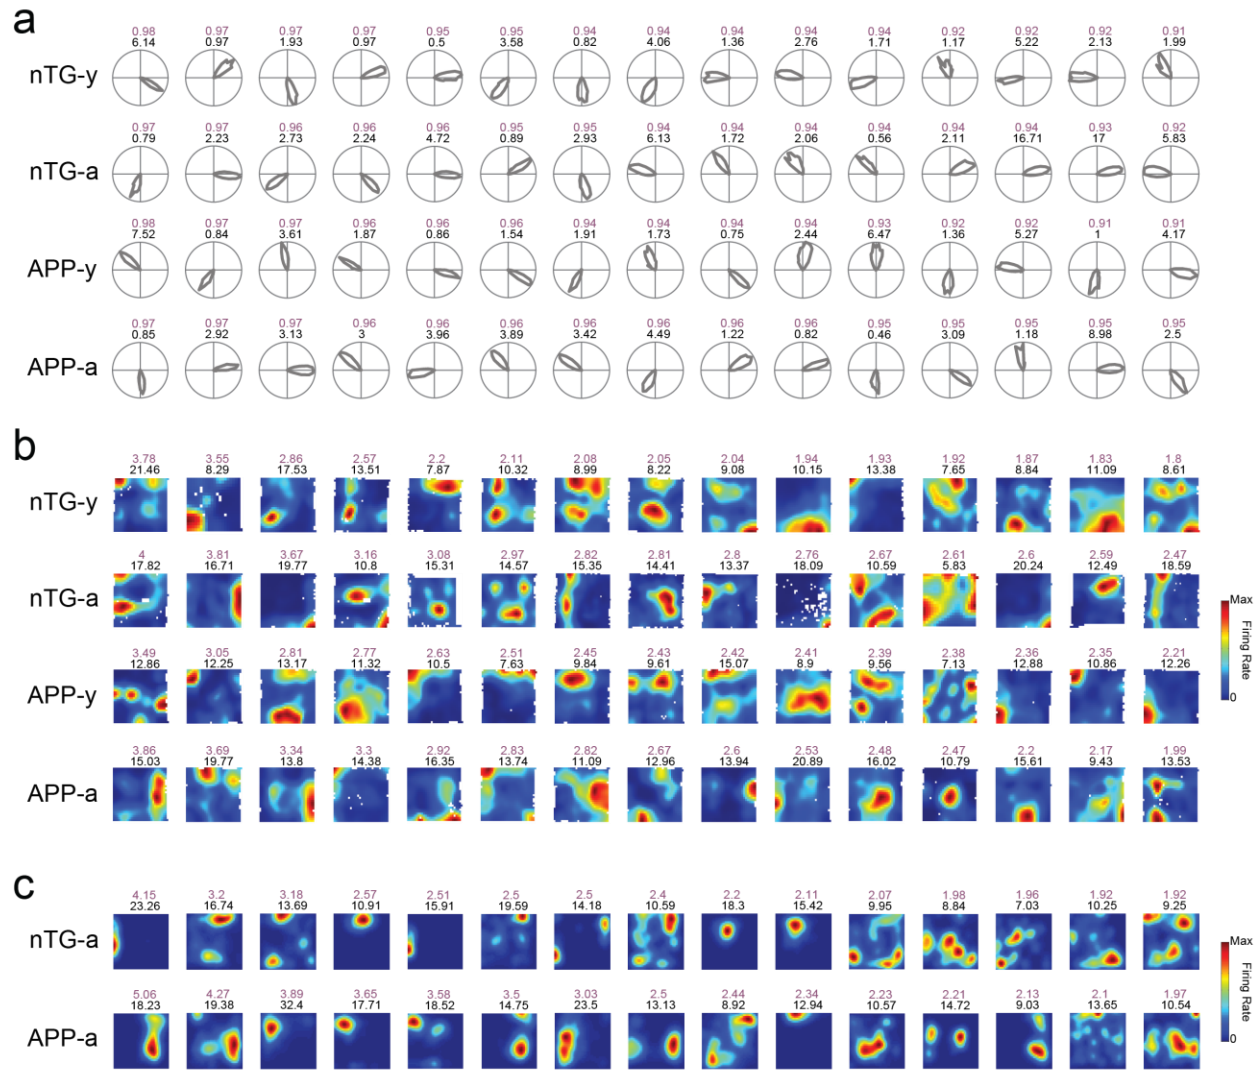

**Supplementary Figure 8.** Top 15 quality cells across groups. **a**, Polar rate maps for head direction cells from each experimental group. Each row includes 15 head direction cells with the highest mean resultant scores sorted in descending order. The mean resultant length (light purple) and peak firing rate (Hz) (black) of each cell are indicated on top of their respective rate maps. **b**, Same as (a) but for non-grid spatially-tuned cells. Cells are sorted by the highest spatial information scores in descending order. The spatial information (light purple) and peak firing rate (Hz) (black) of each cell are indicated on top of their respective rate maps. **c**, Same as (a) but for place cells. Cells are sorted by the highest spatial information scores in descending order. The spatial information (light purple) and peak firing rate (Hz) (black) of each cell are indicated on top of their respective rate maps.

Non-transgenic young mice (nTG-y); non-transgenic adult mice (nTG-a); APP young mice (APP-y); APP adult mice (APP-a).

## Supplementary Figure 9

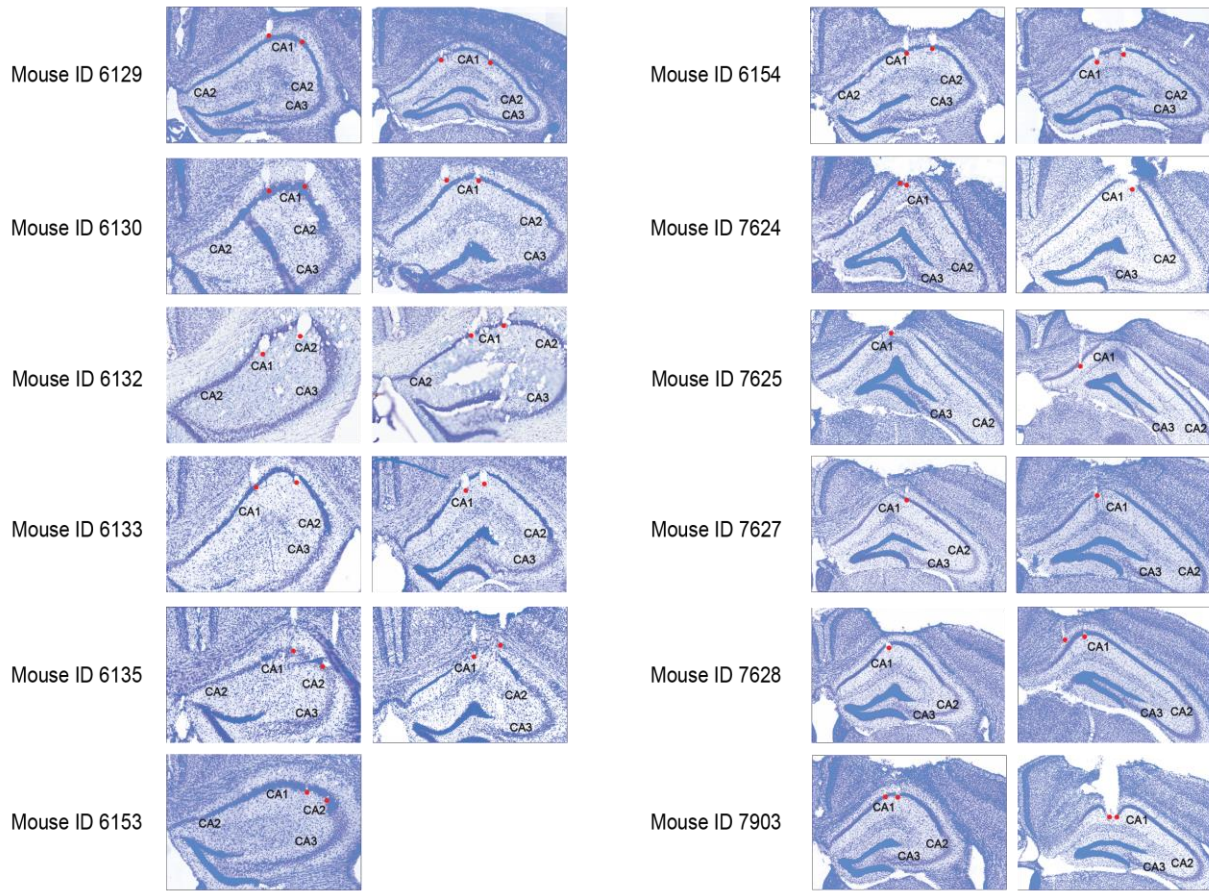

**Supplementary Figure 9.** Tetrode track histology for CA1 recordings. Track tips in each animal are shown in red dots.

## Supplementary Figure 10

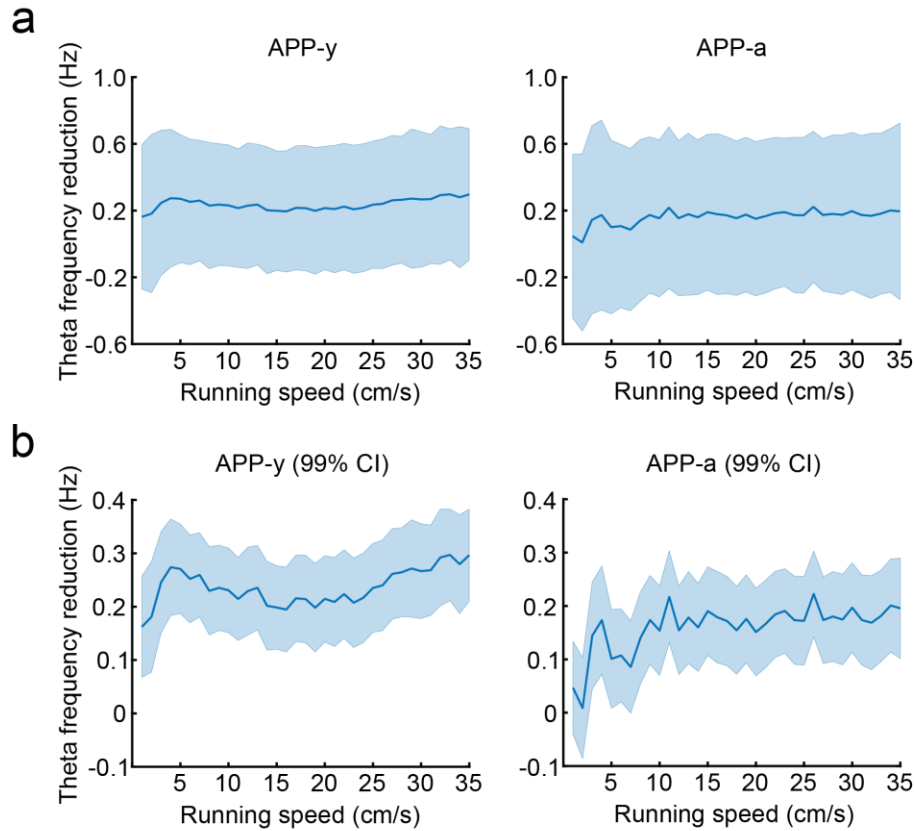

**Supplementary Figure 10.** The magnitude of theta frequency reduction in APP mice is roughly equal across all running speeds. **a**, Reduction of theta frequency in APP-y (left) and APP-a (right) mice across running speeds (APP mice theta frequencies were subtracted from age-matched non-transgenic counterparts). Solid blue lines indicate the mean and light blue contours indicate standard deviation. **b**, Same as (a) but values represent the 99% confidence interval.

## Supplementary Figure 11

a

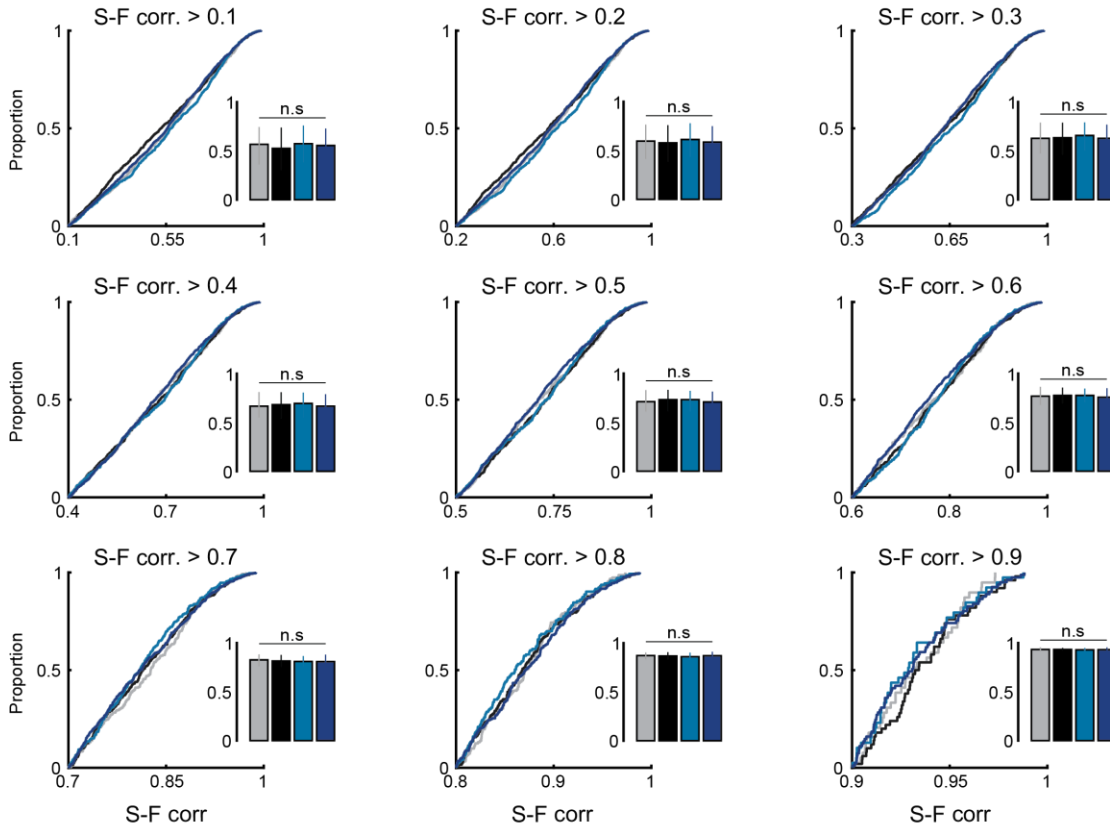

b

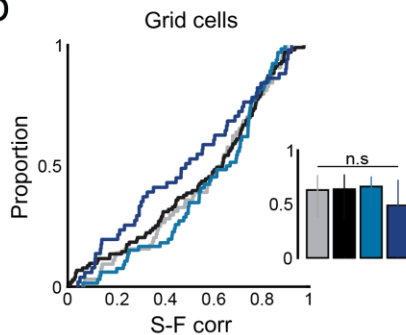

c

Two-way ANOVA: S-F corr. for grid cells

| Source      | Sum Square | df  | MS    | F    | p       |
|-------------|------------|-----|-------|------|---------|
| Age         | 0.26       | 1   | 0.26  | 3.9  | = 0.049 |
| Genotype    | 0.034      | 1   | 0.034 | 0.51 | = 0.48  |
| Interaction | 0.12       | 1   | 0.12  | 1.88 | = 0.17  |
| Error       | 18.45      | 280 | 0.066 |      |         |
| Total       | 18.79      | 283 |       |      |         |

**Supplementary Figure 11.** Intact speed coding in APP mice. **a**, CDF plots compare the running speed vs. firing rate correlation (S-F corr.) of putative speed cells between groups. Putative speed cells were selected based on an arbitrary S-F corr. threshold ranging from 0.1 to 0.9. Inset bar graphs indicate the median S-F corr. and 3rd interquartile range (solid error bar). Y-axes of all inset bar graphs indicate the S-F corr. **b**, Same as (a) but panels compare the S-F corr. for grid cells. Grid-Interneuron: nTG-y vs. nTG-a:  $p = 0.78$ , nTG-y vs. APP-y:  $p = 0.67$ , APP-y vs. APP-a:  $p = 0.059$ , nTG-a vs. APP-a:  $p = 0.20$ . **c**, Two-way unbalanced ANOVAs comparing the effects of age, genotype, and interaction on the S-F corr. for grid cells across groups. df= degrees of freedom, MS = mean square.

## Supplementary Figure 12

Two-way ANOVA: Mean 2D displacement

| Source      | Sum Square | df  | MS    | F    | p        |
|-------------|------------|-----|-------|------|----------|
| Genotype    | 33.79      | 1   | 33.79 | 8.43 | = 0.0038 |
| Cell type   | 38.57      | 2   | 19.29 | 4.81 | = 0.0084 |
| Interaction | 34.83      | 2   | 17.41 | 4.34 | = 0.013  |
| Error       | 3296.64    | 822 | 4.01  |      |          |
| Total       | 3410.74    | 827 |       |      |          |

Pairwise comparisons: Tukey's test

| Comparisons                          | Mean diff.   | 95% C.I. for true mean diff. |              | p             |
|--------------------------------------|--------------|------------------------------|--------------|---------------|
|                                      |              | LL                           | UL           |               |
| <b>nTG-a grid - APP-a grid</b>       | <b>-1.23</b> | <b>-2.23</b>                 | <b>-0.23</b> | <b>0.0064</b> |
| nTG-a grid - nTG-a nongrid           | -0.69        | -1.56                        | 0.17         | 0.2           |
| nTG-a grid - APP-a nongrid           | -0.79        | -1.58                        | 0.00         | 0.049         |
| nTG-a grid - nTG-a place             | -1.08        | -1.77                        | -0.39        | 0.00012       |
| nTG-a grid - APP-a place             | -1.18        | -1.87                        | -0.49        | 1.60E-05      |
| APP-a grid - nTG-a nongrid           | 0.54         | -0.50                        | 1.57         | 0.68          |
| APP-a grid - APP-a nongrid           | 0.44         | -0.54                        | 1.41         | 0.8           |
| APP-a grid - nTG-a place             | 0.15         | -0.75                        | 1.04         | 1             |
| APP-a grid - APP-a place             | 0.05         | -0.84                        | 0.94         | 1             |
| <b>nTG-a nongrid - APP-a nongrid</b> | <b>-0.10</b> | <b>-0.93</b>                 | <b>0.73</b>  | <b>1</b>      |
| nTG-a nongrid - nTG-a place          | -0.39        | -1.13                        | 0.35         | 0.66          |
| nTG-a nongrid - APP-a place          | -0.49        | -1.22                        | 0.25         | 0.41          |
| APP-a nongrid - nTG-a place          | -0.29        | -0.94                        | 0.36         | 0.8           |
| APP-a nongrid - APP-a place          | -0.39        | -1.03                        | 0.26         | 0.53          |
| <b>nTG-a place - APP-a place</b>     | <b>-0.10</b> | <b>-0.61</b>                 | <b>0.42</b>  | <b>0.99</b>   |

**Supplementary Figure 12.** Two-way unbalanced ANOVAs comparing the effects of genotype, cell type, and interaction on the mean 2D displacement scores for grid cells, non-grid spatially-tuned cells and place cells. Grid cells, non-grid spatially-tuned cells and place cells were included in the "Cell type" factor. Multiple pairwise comparisons with Tukey's test at a corrected alpha value of 0.05 are shown at the bottom. The 3 comparisons of interest (nTG-a grid - APP-a grid; nTG-a nongrid - APP-a nongrid; nTG-a place - APP-a place) are bolded.

df= degrees of freedom, MS = mean square.

## Supplementary Figure 13. Page 1

a

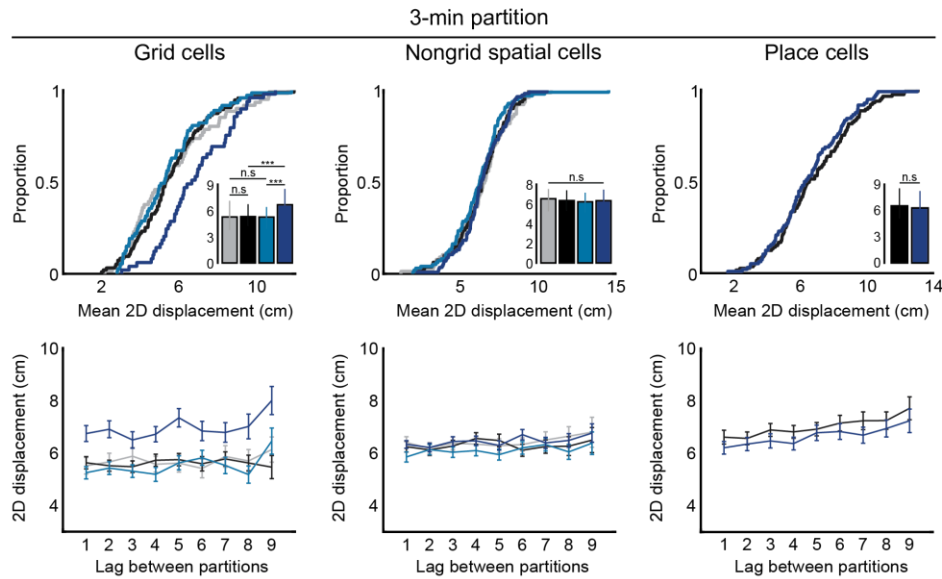

b

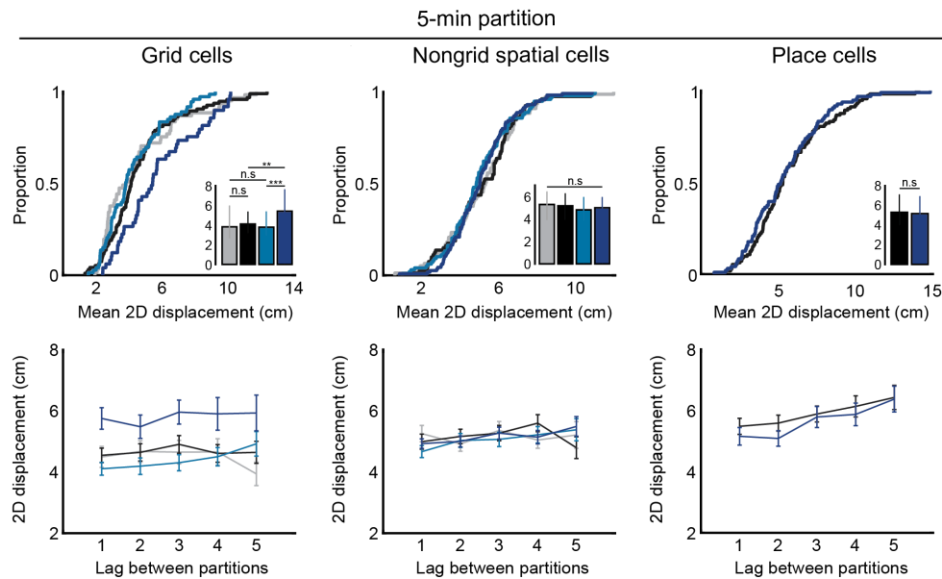



## Supplementary Figure 13. Page 2

c

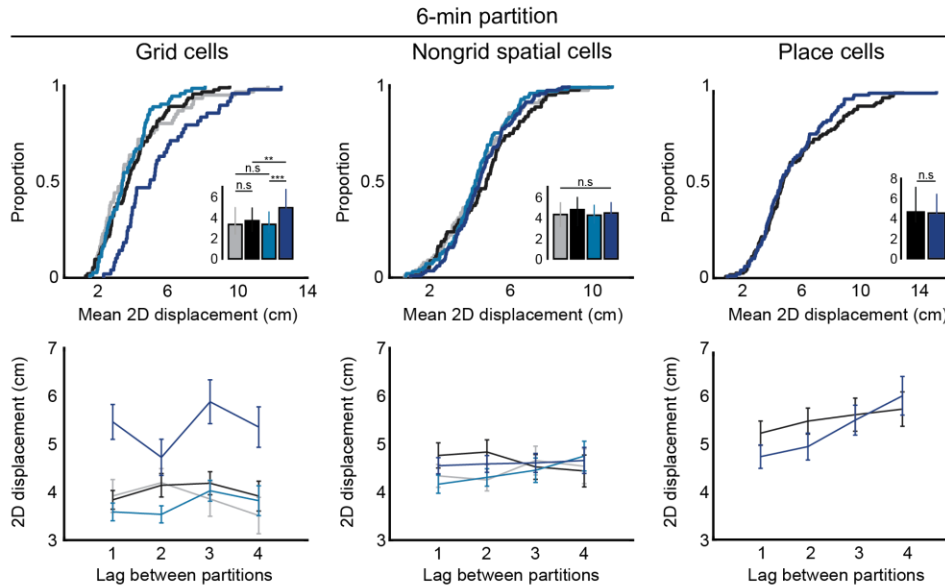

d

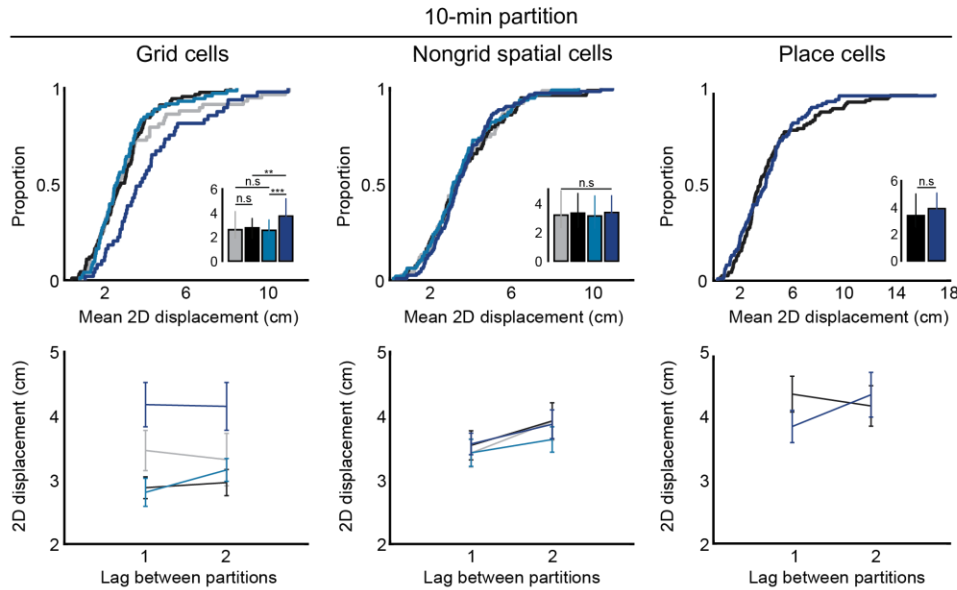

**Supplementary Figure 13.** Reduced grid cell spatial stability in adult APP mice persists across different partition lengths. **a**, 3-minute partition analyses. (top-row) CDF plots compare the mean two dimensional displacement of grid cells, non-grid spatially-tuned cells and place cells between groups. Inset bar graph displays the median displacement and 3rd interquartile range (solid error bar). Y-axes of all inset bar graphs indicate the mean two dimensional displacement. (Grid cells: nTG-y vs. nTG-a:  $p = 0.76$ , nTG-y vs. APP-y:  $p = 0.76$ , APP-y vs. APP-a:  $p = 0.00091$ , nTG-a vs. APP-a:  $p = 0.00034$ ; Nongrid spatial cells: nTG-y vs. nTG-a:  $p = 0.74$ , nTG-y vs. APP-y:  $p = 0.24$ , APP-y vs. APP-a:  $p = 0.19$ , nTG-a vs. APP-a:  $p = 0.87$ ; Place cells: nTG-a vs. APP-a:  $p = 0.37$ ). (bottom-row) Two dimensional displacement of grid cells, non-grid spatially-tuned cells and place cells as a function of lags between partitions. Dots indicate mean values and error bars indicate standard error of mean. **b, c, d**, Same as **(a)** but panels compare 5-minute, 6-minute, and 10-minute partitions respectively. (*5 min partitions*: Grid cells: nTG-y vs. nTG-a:  $p = 0.35$ , nTG-y vs. APP-y:  $p = 0.98$ , APP-y vs. APP-a:  $p = 0.0019$ , nTG-a vs. APP-a:  $p = 0.01$ ; Nongrid spatial cells: nTG-y vs. nTG-a:  $p = 0.92$ , nTG-y vs. APP-y:  $p = 0.35$ , APP-y vs. APP-a:  $p = 0.65$ , nTG-a vs. APP-a:  $p = 0.58$ ; Place cells: nTG-a vs. APP-a:  $p = 0.67$ ). (*6 min partitions*: Grid cells: nTG-y vs. nTG-a:  $p = 0.39$ , nTG-y vs. APP-y:  $p = 1$ , APP-y vs. APP-a:  $p = 0.00006$ , nTG-a vs. APP-a:  $p = 0.0025$ ; Nongrid spatial cells: nTG-y vs. nTG-a:  $p = 0.31$ , nTG-y vs. APP-y:  $p = 0.96$ , APP-y vs. APP-a:  $p = 0.41$ , nTG-a vs. APP-a:  $p = 0.67$ ; Place cells: nTG-a vs. APP-a:  $p = 0.47$ ). (*10 min partitions*: Grid cells: nTG-y vs. nTG-a:  $p = 0.93$ , nTG-y vs. APP-y:  $p = 0.53$ , APP-y vs. APP-a:  $p = 0.00084$ , nTG-a vs. APP-a:  $p = 0.0026$ ; Nongrid spatial cells: nTG-y vs. nTG-a:  $p = 0.92$ , nTG-y vs. APP-y:  $p = 0.65$ , APP-y vs. APP-a:  $p = 0.35$ , nTG-a vs. APP-a:  $p = 0.79$ ; Place cells: nTG-a vs. APP-a:  $p = 0.61$ ). \*\* =  $p < 0.01$ , \*\*\* =  $p < 0.001$ , corrected for multiple comparisons.

## Supplementary Figure 14

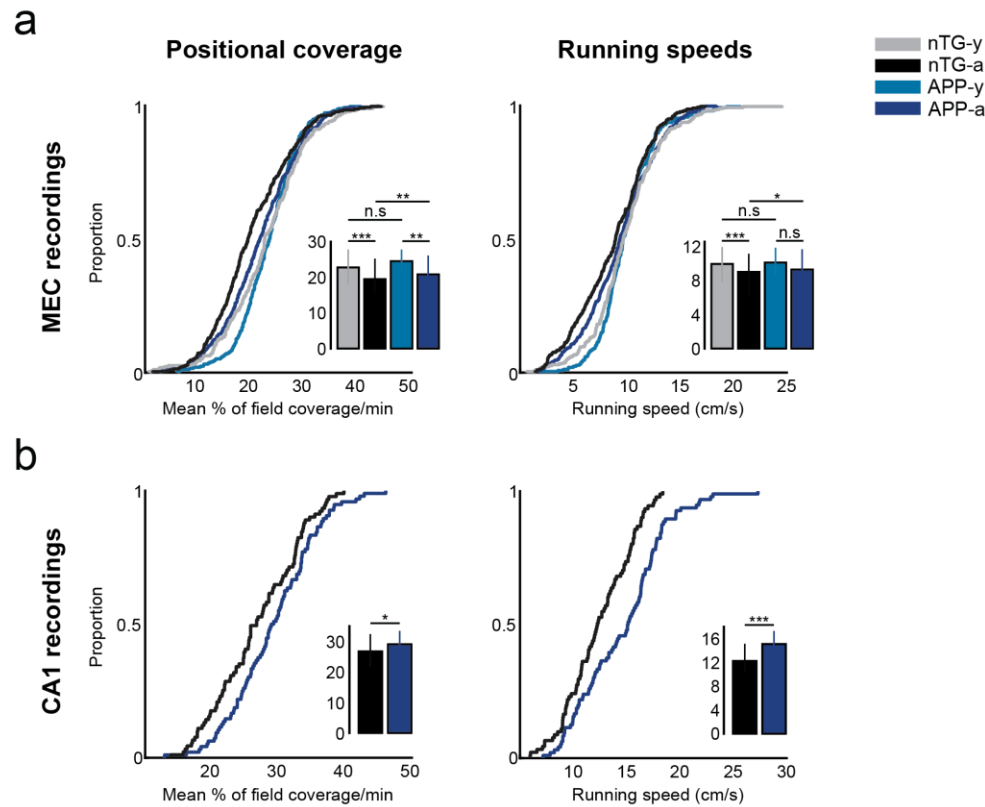

1839 **Supplementary Figure 14.** Positional coverage and running speeds across groups for MEC and CA1 recordings. **a**, CDF plots  
1840 compare the mean % of the environment covered per minute and average running speed between experimental groups for MEC  
1841 recordings. Inset bar graphs display the median and 3rd interquartile range (solid error bars). Y-axes of all inset bar graphs  
1842 indicate the value of the metric being compared by the corresponding CDF plot. (Mean % of field coverage/min: nTG-y vs.  
1843 nTG-a:  $p = 0.000033$ , nTG-y vs. APP-y:  $p = 0.51$ , APP-y vs. APP-a:  $p = 0.0053$ , nTG-a vs. APP-a:  $p = 0.0041$ ; Running speed:  
1844 nTG-y vs. nTG-a:  $p = 0.00091$ , nTG-y vs. APP-y:  $p = 0.91$ , APP-y vs. APP-a:  $p = 0.099$ , nTG-a vs. APP-a:  $p = 0.047$ ). **b**, Same  
1845 as (a), but for CA1 recordings. (Mean % of field coverage/min: nTG-a vs. APP-a:  $p = 0.017$ ; Running speed: nTG-a vs. APP-a:  $p$   
1846 =  $0.00014$ ). \* =  $p < 0.05$ , \*\* =  $p < 0.01$ , \*\*\* =  $p < 0.001$ , corrected for multiple comparisons.

1847  
1848  
1849  
1850  
1851  
1852  
1853  
1854  
1855  
1856  
1857  
1858

## Supplementary Figure 15

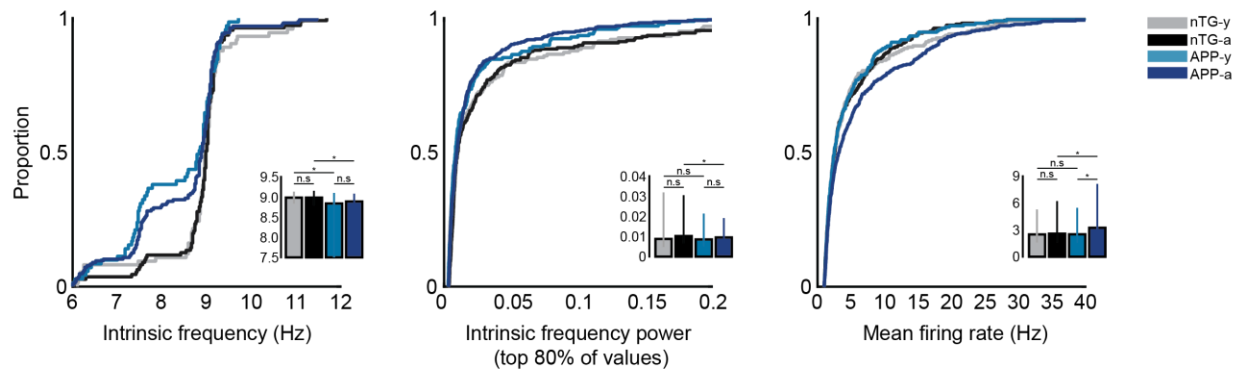

1869 **Supplementary Figure 15.** Interneuron firing properties. Cumulative distribution functions (CDFs) compare the intrinsic frequen-  
1870 cy, intrinsic frequency power (for the top 80% of values), and mean firing rates of interneurons between experimental groups.  
1871 Inset bar graphs display the median and 3rd interquartile range (solid error bars). Y-axes of inset bar graphs indicate the value  
1872 of the metric being compared by the corresponding CDF plot. (Intrinsic frequency: nTG-y vs. nTG-a:  $p = 0.99$ , nTG-y vs. APP-y:  
1873  $p = 0.038$ , APP-y vs. APP-a:  $p = 0.49$ , nTG-a vs. APP-a:  $p = 0.023$ ; Intrinsic frequency power (top 80% of values): nTG-y vs.  
1874 nTG-a:  $p = 0.056$ , nTG-y vs. APP-y:  $p = 0.58$ , APP-y vs. APP-a:  $p = 0.38$ , nTG-a vs. APP-a:  $p = 0.034$ ; Mean firing rate: nTG-y  
1875 vs. nTG-a:  $p = 0.95$ , nTG-y vs. APP-y:  $p = 0.82$ , APP-y vs. APP-a:  $p = 0.034$ , nTG-a vs. APP-a:  $p = 0.028$ ). \* =  $p < 0.05$ , correct-  
1876 ed for multiple comparisons.

## Supplementary Figure 16

1899  
1900  
1901  
1902  
1903  
1904  
1905  
1906  
1907  
1908  
1909  
1910  
1911  
1912  
1913  
1914  
1915  
1916  
1917  
1918  
1919  
1920  
1921  
1922  
1923  
1924  
1925  
1926  
1927  
1928  
1929  
1930  
1931  
1932  
1933  
1934  
1935  
1936  
1937  
1938

**Two-way ANOVA: Intrinsic frequency (Hz)**

| Source      | Sum Square | df  | MS    | F     | p           |
|-------------|------------|-----|-------|-------|-------------|
| Age         | 0.58       | 1   | 0.58  | 0.60  | = 0.44      |
| Genotype    | 20.42      | 1   | 20.42 | 21.23 | = 0.0000054 |
| Interaction | 0.61       | 1   | 0.61  | 0.63  | = 0.43      |
| Error       | 403.04     | 419 | 0.96  |       |             |
| Total       | 423.90     | 422 |       |       |             |

**Two-way ANOVA: Intrinsic frequency power (top 80% of values)**

| Source      | Sum Square            | df  | MS                    | F     | p        |
|-------------|-----------------------|-----|-----------------------|-------|----------|
| Age         | $9 \times 10^{-5}$    | 1   | $9 \times 10^{-5}$    | 0.03  | = 0.85   |
| Genotype    | $3.74 \times 10^{-2}$ | 1   | $3.74 \times 10^{-2}$ | 14.72 | = 0.0001 |
| Interaction | $5.80 \times 10^{-4}$ | 1   | $5.80 \times 10^{-4}$ | 0.23  | = 0.63   |
| Error       | 2.28                  | 897 | $2.54 \times 10^{-3}$ |       |          |
| Total       | 2.33                  | 900 |                       |       |          |

**Two-way ANOVA: Mean firing rate (Hz)**

| Source      | Sum Square         | df   | MS     | F    | p        |
|-------------|--------------------|------|--------|------|----------|
| Age         | 147.70             | 1    | 147.70 | 3.06 | = 0.081  |
| Genotype    | 63.60              | 1    | 63.60  | 1.32 | = 0.25   |
| Interaction | 326.10             | 1    | 326.10 | 6.75 | = 0.0095 |
| Error       | $5.42 \times 10^4$ | 1123 | 48.34  |      |          |
| Total       | $5.50 \times 10^4$ | 1126 |        |      |          |

**Supplementary Figure 16.** Two-way unbalanced ANOVAs comparing the effects of age, genotype, and interaction on the intrinsic frequency, intrinsic frequency power (for the top 80% of values), and mean firing rates of interneurons between experimental groups.

df= degrees of freedom, MS = mean square.

1939  
1940  
1941  
1942  
1943  
1944  
1945  
1946  
1947  
1948  
1949  
1950  
1951  
1952  
1953  
1954  
1955  
1956  
1957  
1958  
1959  
1960  
1961  
1962  
1963  
1964  
1965  
1966  
1967  
1968  
1969  
1970  
1971  
1972  
1973  
1974  
1975  
1976  
1977  
1978

## Supplementary Figure 17

**Two-way ANOVA: Grid cell-interneuron synchrony**

| Source      | Sum Square | df  | MS     | F    | p          |
|-------------|------------|-----|--------|------|------------|
| Age         | 2.38       | 1   | 2.38   | 0.27 | = 0.60     |
| Genotype    | 173.58     | 1   | 173.58 | 19.8 | = 0.000013 |
| Interaction | 25.16      | 1   | 25.17  | 2.87 | = 0.09     |
| Error       | 2270.69    | 259 | 8.77   |      |            |
| Total       | 2520.39    | 262 |        |      |            |

**Two-way ANOVA: Grid cell-head direction cell synchrony**

| Source      | Sum Square | df  | MS    | F    | p        |
|-------------|------------|-----|-------|------|----------|
| Age         | 37.53      | 1   | 37.53 | 7.07 | = 0.0083 |
| Genotype    | 34.11      | 1   | 34.11 | 6.43 | = 0.0119 |
| Interaction | 16.08      | 1   | 16.08 | 3.03 | = 0.08   |
| Error       | 1289.16    | 243 | 5.31  |      |          |
| Total       | 1356.97    | 246 |       |      |          |

**Supplementary Figure 17.** Two-way unbalanced ANOVAs comparing the effects of age, genotype, and interaction on the mean co-activity within a 25 ms time window for grid cell-interneuron pairs, and grid cell-head direction cell pairs.

df= degrees of freedom, MS = mean square.

## Supplementary Figure 18

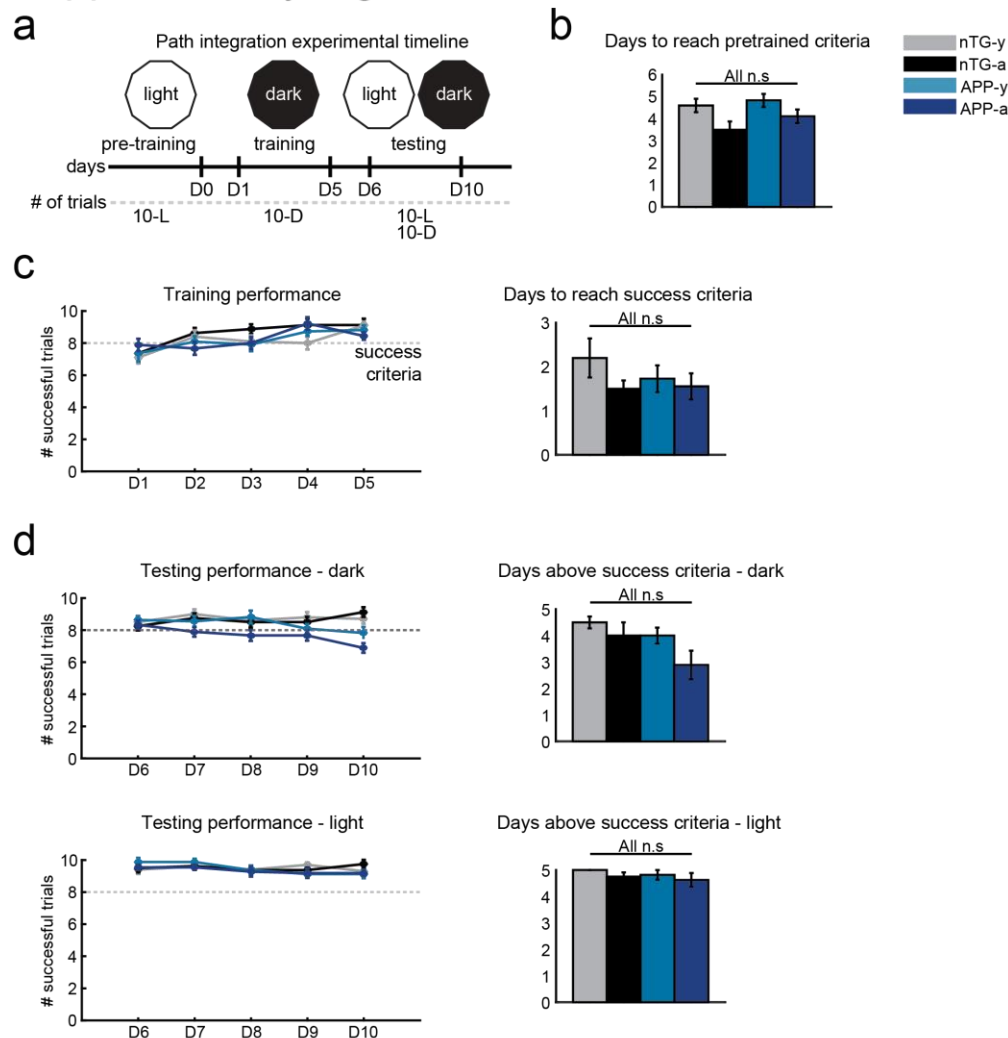

**Supplementary Figure 18.** Experimental timeline for the path integration task and mouse performance across days. **a**, Experimental timeline for the food-foraging task. Days are indicated as D0, D1, etc. The number of trials that each mouse performed are indicated as 10-L (i.e. 10 light trials) and 10-D (i.e. 10 dark trials). **b**, The number of days that it took mice in each group to achieve the success criteria in the pre-training phase (8/10 successful trials). (nTG-y vs. nTG-a:  $p = 0.079$ , nTG-y vs. APP-y:  $p = 0.65$ , APP-y vs. APP-a:  $p = 0.24$ , nTG-a vs. APP-a:  $p = 0.28$ ). **c**, (Left) The number of successful trials achieved by mice across 5 days of training. (Right) The number of days within this training period that mice took to reach the success criteria. (nTG-y vs. nTG-a:  $p = 0.42$ , nTG-y vs. APP-y:  $p = 0.45$ , APP-y vs. APP-a:  $p = 0.70$ , nTG-a vs. APP-a:  $p = 0.84$ ). **d**, (Top-Left) Same as (c) but across 5 days of testing in dark conditions. (Top-Right) The number of days within this testing period that mice performed at or above the success criteria. (nTG-y vs. nTG-a:  $p = 0.60$ , nTG-y vs. APP-y:  $p = 0.24$ , APP-y vs. APP-a:  $p = 0.11$ , nTG-a vs. APP-a:  $p = 0.11$ ). (Bottom-Left) Same as (c) but across 5 days of testing in light conditions. (Bottom-Right) The number of days within this testing period that mice performed at or above the success criteria. (nTG-y vs. nTG-a:  $p = 0.37$ , nTG-y vs. APP-y:  $p = 0.39$ , APP-y vs. APP-a:  $p = 0.75$ , nTG-a vs. APP-a:  $p = 1$ ). Bars indicate mean values and error bars indicate standard error of mean.

## Supplementary Figure 19

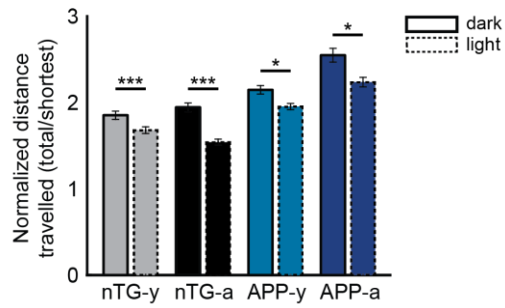

**Supplementary Figure 19.** Overall navigation ability improves in light trials for all mice. Bar graph compares the normalized distance travelled in dark (solid lines) versus light (dashed lines) trials. Bars indicate mean values and error bars indicate standard error of mean. (nTG-y:  $p = 2.1e-8$ ; nTG-a:  $p = 5.7e-21$ ; APP-y:  $p = 0.017$ ; APP-a:  $p = 0.017$ ). \* =  $p < 0.05$ , \*\*\* =  $p < 0.001$ , corrected for multiple comparisons.

2019  
2020  
2021  
2022  
2023  
2024  
2025  
2026  
2027  
2028  
2029  
2030  
2031  
2032  
2033  
2034  
2035  
2036  
2037  
2038  
2039  
2040  
2041  
2042  
2043  
2044  
2045  
2046  
2047  
2048  
2049  
2050  
2051  
2052  
2053  
2054  
2055  
2056  
2057  
2058

## Supplementary Figure 20

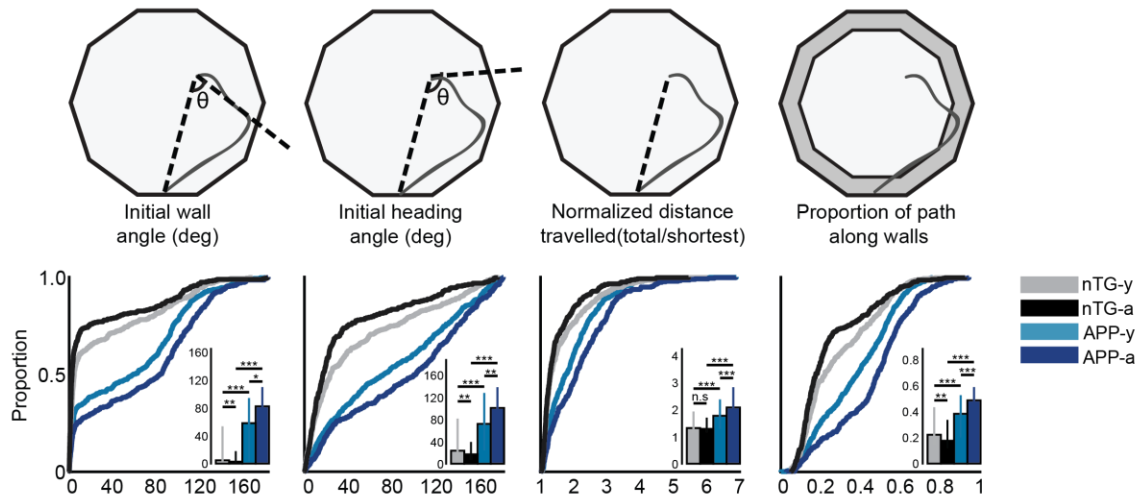

**Supplementary Figure 20.** APP mice have impaired path integration ability in light conditions. CDF plots compare the initial wall angle, the initial heading angle, the normalized distance travelled and the proportion of the return path spent along the periphery between groups. Inset bar graphs display the median and 3rd interquartile range (solid error bars). Y-axes of all inset bar graphs indicate the value of the metric being compared by the corresponding CDF plot. The calculation of each metric is shown in schematics above their respective plots. (Initial wall angle: nTG-y vs. nTG-a:  $p = 0.0075$ , nTG-y vs. APP-y:  $p = 1.1e-18$ , APP-y vs. APP-a:  $p = 0.013$ , nTG-a vs. APP-a:  $p = 1.5e-32$ ; Initial heading angle: nTG-y vs. nTG-a:  $p = 0.0029$ , nTG-y vs. APP-y:  $p = 3.4e-17$ , APP-y vs. APP-a:  $p = 0.0044$ , nTG-a vs. APP-a:  $p = 1.2e-33$ ; Normalized distance travelled: nTG-y vs. nTG-a:  $p = 0.053$ , nTG-y vs. APP-y:  $p = 7.7e-12$ , APP-y vs. APP-a:  $p = 6.3e-5$ , nTG-a vs. APP-a:  $p = 1.2e-26$ ; Proportion of path along walls: nTG-y vs. nTG-a:  $p = 0.0015$ , nTG-y vs. APP-y:  $p = 8.2e-13$ , APP-y vs. APP-a:  $p = 9.5e-9$ , nTG-a vs. APP-a:  $p = 9.3e-35$ ). \* =  $p < 0.05$ , \*\* =  $p < 0.01$ , \*\*\* =  $p < 0.001$ , corrected for multiple comparisons.



## Supplementary Figure 21

a

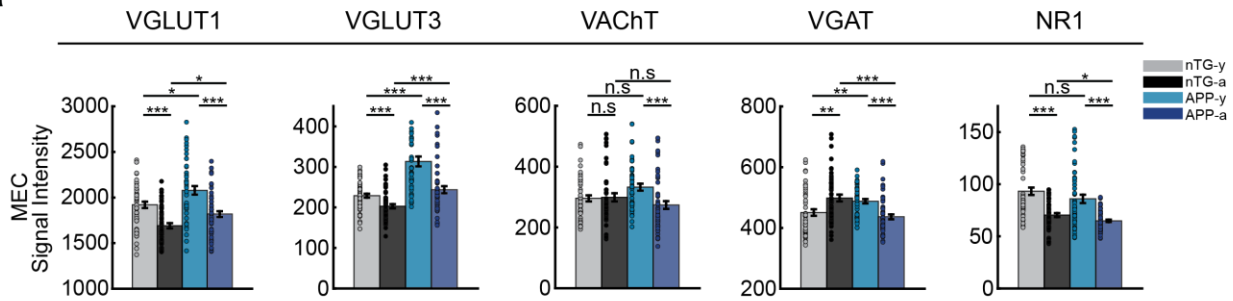

b

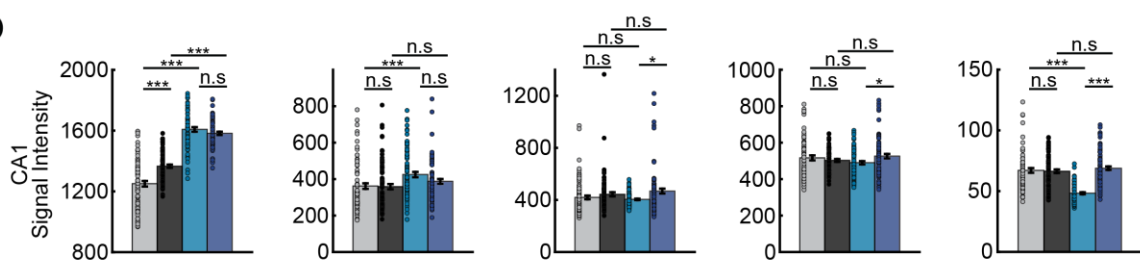

**Supplementary Figure 21.** Immunohistochemical labelling of synaptic markers in the MEC and CA1. **a**, Bar graphs compare signal intensity of VGLUT1, VGLUT3, VACHT, VGAT and NR1 synaptic markers in the MEC. Bars indicate mean and error bars indicate standard error of mean. Individual data points are scattered. (VGLUT1: nTG-y vs. nTG-a:  $p = 1.3 \times 10^{-5}$ , nTG-y vs. APP-y:  $p = 0.014$ , APP-y vs. APP-a:  $p = 1.1 \times 10^{-4}$ , nTG-a vs. APP-a:  $p = 0.014$ ; VGLUT3: nTG-y vs. nTG-a:  $p = 1.9 \times 10^{-4}$ , nTG-y vs. APP-y:  $p = 1.5 \times 10^{-8}$ , APP-y vs. APP-a:  $p = 2.6 \times 10^{-6}$ , nTG-a vs. APP-a:  $p = 2.3 \times 10^{-4}$ ; VACHT: nTG-y vs. nTG-a:  $p = 0.87$ , nTG-y vs. APP-y:  $p = 0.053$ , APP-y vs. APP-a:  $p = 4.5 \times 10^{-4}$ , nTG-a vs. APP-a:  $p = 0.051$ ; VGAT: nTG-y vs. nTG-a:  $p = 0.0037$ , nTG-y vs. APP-y:  $p = 0.0027$ , APP-y vs. APP-a:  $p = 7.4 \times 10^{-6}$ , nTG-a vs. APP-a:  $p = 2.1 \times 10^{-5}$ ; NR1: nTG-y vs. nTG-a:  $p = 1.6 \times 10^{-5}$ , nTG-y vs. APP-y:  $p = 0.063$ , APP-y vs. APP-a:  $p = 2.7 \times 10^{-5}$ , nTG-a vs. APP-a:  $p = 0.023$ ). **b**, Same as (a), but for CA1. (VGLUT1: nTG-y vs. nTG-a:  $p = 4.6 \times 10^{-6}$ , nTG-y vs. APP-y:  $p = 3.9 \times 10^{-21}$ , APP-y vs. APP-a:  $p = 0.15$ , nTG-a vs. APP-a:  $p = 4.5 \times 10^{-21}$ ; VGLUT3: nTG-y vs. nTG-a:  $p = 0.76$ , nTG-y vs. APP-y:  $p = 5.7 \times 10^{-4}$ , APP-y vs. APP-a:  $p = 0.066$ , nTG-a vs. APP-a:  $p = 0.10$ ; VACHT: nTG-y vs. nTG-a:  $p = 0.14$ , nTG-y vs. APP-y:  $p = 0.30$ , APP-y vs. APP-a:  $p = 0.039$ , nTG-a vs. APP-a:  $p = 0.39$ ; VGAT: nTG-y vs. nTG-a:  $p = 0.87$ , nTG-y vs. APP-y:  $p = 0.33$ , APP-y vs. APP-a:  $p = 0.074$ , nTG-a vs. APP-a:  $p = 0.35$ ; NR1: nTG-y vs. nTG-a:  $p = 0.71$ , nTG-y vs. APP-y:  $p = 2.1 \times 10^{-14}$ , APP-y vs. APP-a:  $p = 9.4 \times 10^{-19}$ , nTG-a vs. APP-a:  $p = 0.41$ ). \* =  $p < 0.05$ , \*\* =  $p < 0.01$ , \*\*\* =  $p < 0.001$ , corrected for multiple comparisons.

## Supplementary Figure 22

a

### Linear mixed effects model predicting VGLUT3 expression in the MEC

#### Model information

Number of observations : 198  
 Fixed effects coefficients : 3  
 Random effects coefficients : 48  
 Covariance parameters : 4

#### Model fit statistics

AIC : 2071.4  
 BIC : 2094.4  
 Log Likelihood : -1028.7  
 Deviance : 2057.4

#### Fixed effects coefficients (95% CIs):

| Name      | Estimate | Std. Error | tStat | DF  | p         | 95% CI  |        |
|-----------|----------|------------|-------|-----|-----------|---------|--------|
|           |          |            |       |     |           | LL      | UL     |
| Intercept | 253.03   | 18.12      | 13.96 | 195 | = 3.6e-31 | 217.29  | 288.77 |
| Genotype  | -60.5    | 21.78      | -2.78 | 195 | = 0.006   | -103.45 | -17.55 |
| Age       | 48.23    | 21.96      | 2.2   | 195 | = 0.0292  | 4.93    | 91.55  |

#### Random effects covariance (95% CIs):

| Subject(16 levels) | Estimate | 95% CI |       |
|--------------------|----------|--------|-------|
|                    |          | LL     | UL    |
| Intercept          | 39.48    | 25.95  | 60.05 |
| * Genotype         | < 0.001  | NaN    | NaN   |
| * Age              | 22.15    | 19.98  | 24.56 |

  

| Error    | Estimate | 95% CI |       |
|----------|----------|--------|-------|
|          |          | LL     | UL    |
| Residual | 39.1     | 35.29  | 43.33 |

b

### Linear mixed effects model predicting VGLUT1 expression in CA1

#### Model information

Number of observations : 308  
 Fixed effects coefficients : 3  
 Random effects coefficients : 48  
 Covariance parameters : 4

#### Model fit statistics

AIC : 3687.8  
 BIC : 3713  
 Log Likelihood : -1836.9  
 Deviance : 3673.8

#### Fixed effects coefficients (95% CIs):

| Name      | Estimate | Std. Error | tStat | DF  | p          | 95% CI  |        |
|-----------|----------|------------|-------|-----|------------|---------|--------|
|           |          |            |       |     |            | LL      | UL     |
| Intercept | 1590.7   | 21.47      | 74.09 | 305 | = 4.8e-197 | 1548.5  | 1633   |
| Genotype  | -270.68  | 45.09      | -6    | 305 | = 5.5e-9   | -359.41 | -181.9 |
| Age       | -3.91    | 38.68      | -0.1  | 305 | = 0.92     | -80.02  | 72.2   |

#### Random effects covariance (95% CIs):

| Subject(16 levels) | Estimate | 95% CI |        |
|--------------------|----------|--------|--------|
|                    |          | LL     | UL     |
| Intercept          | 39.6     | 17.22  | 91.03  |
| * Genotype         | 96.99    | 30.2   | 311.5  |
| * Age              | 61.3     | 9.05   | 415.14 |

  

| Error    | Estimate | 95% CI |       |
|----------|----------|--------|-------|
|          |          | LL     | UL    |
| Residual | 84.54    | 80.72  | 94.93 |

**Supplementary Figure 22.** We used the fitlme function in MATLAB to perform linear mixed effects analyses on the relationship between the subjects' genotype (nTG and APP), age (young and adult) and expression of VGLUT3 and VGLUT1 levels in the MEC and CA1 respectively. The fixed effects of the model comprised genotype and age (without interaction between the two). The random effects of the model comprised random intercepts by-subject, random slopes for the effects of genotype and age by-subject, and independence between the intercepts and slopes. P-values obtained in the model output were considered as the measurements for significance.

**a,** Table shows the model information, statistics of fit, the fixed effects coefficients, and the random effects covariance parameters. In the fixed effects panel, the 'Intercept' refers to the aged APP experimental group; its estimate is the predicted mean VGLUT3 signal intensity. The estimates for genotype and age refer to the predicted slope change from the intercept. Std. Error refers to the standard error associated with the slope. T-values and P-values for the contribution of genotype and age are bolded. **b,** Same as (a) but for levels of VGLUT1 in CA1.

tStat = T-value, CI = confidence interval, DF = degrees of freedom, LL = lower limit, UL = upper limit.  
 \* = independence between intercepts and slopes.

## Supplementary Figure 23

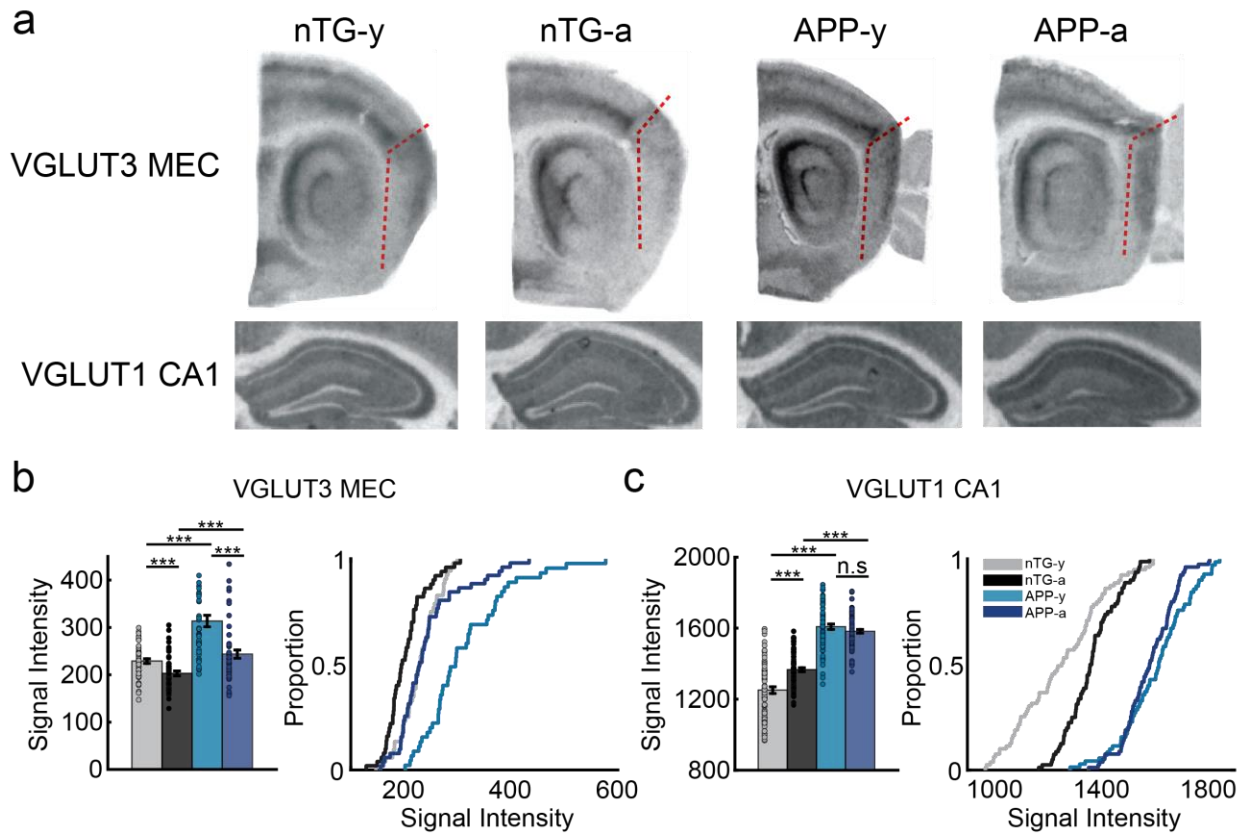

**Supplementary Figure 23.** Pathological expression of MEC VGLUT3 levels and CA1 VGLUT1 levels in APP mice. **a**, Single slice examples of VGLUT3 and VGLUT1 expression in MEC and CA1 respectively. Darker signals indicate higher marker expression levels. **b**, (left) Bar graph shows signal intensity of VGLUT3 levels in the MEC between experimental groups. Error bars indicate standard error of mean, and individual sample points are scattered. (right) Cumulative distribution function (CDF) compares the signal intensity between experimental groups. (nTG-y vs. nTG-a:  $p = 1.9 \times 10^{-4}$ , nTG-y vs. APP-y:  $p = 1.5 \times 10^{-8}$ , APP-y vs. APP-a:  $p = 2.6 \times 10^{-6}$ , nTG-a vs. APP-a:  $p = 2.3 \times 10^{-4}$ ). **c**, Same as (b), but panels compare signal intensity of VGLUT1 levels in the CA1 between experimental groups. (nTG-y vs. nTG-a:  $p = 4.6 \times 10^{-6}$ , nTG-y vs. APP-y:  $p = 3.9 \times 10^{-21}$ , APP-y vs. APP-a:  $p = 0.15$ , nTG-a vs. APP-a:  $p = 4.5 \times 10^{-21}$ ). \* =  $p < 0.05$ , \*\* =  $p < 0.01$ , \*\*\* =  $p < 0.001$ , corrected for multiple comparisons.

## Supplementary Figure 24

Two-way ANOVA: VGLUT3 signal in the MEC

| Source      | Sum Square (10 <sup>4</sup> ) | df  | MS(10 <sup>4</sup> ) | F     | p         |
|-------------|-------------------------------|-----|----------------------|-------|-----------|
| Age         | 11.34                         | 1   | 11.34                | 35.83 | = 1e-8    |
| Genotype    | 19.34                         | 1   | 19.34                | 61.09 | = 3.4e-13 |
| Interaction | 2.36                          | 1   | 2.36                 | 7.46  | = 0.0069  |
| Error       | 61.42                         | 194 | 0.32                 |       |           |
| Total       | 92.71                         | 197 |                      |       |           |

Two-way ANOVA: VGLUT1 signal in CA1

| Source      | Sum Square (10 <sup>4</sup> ) | df  | MS(10 <sup>4</sup> ) | F      | p         |
|-------------|-------------------------------|-----|----------------------|--------|-----------|
| Age         | 15.28                         | 1   | 15.28                | 9.94   | = 0.0018  |
| Genotype    | 631.66                        | 1   | 631.66               | 410.95 | = 2.1e-58 |
| Interaction | 38.18                         | 1   | 38.18                | 24.84  | = 1e-6    |
| Error       | 467.27                        | 304 | 1.54                 |        |           |
| Total       | 1150.26                       | 307 |                      |        |           |

**Supplementary Figure 24.** Two-way unbalanced ANOVAs comparing the effects of age, genotype, and interaction on VGLUT3 and VGLUT1 signal levels in the MEC and CA1 respectively.

df= degrees of freedom, MS = mean square.
